# Supplementary material for: Rhodium(i)-catalyzed C–S bond formation via enantioselective carbenoid S–H insertion: catalytic asymmetric synthesis of α-thioesters
Source: Royal Society of Chemistry journal article supplement (doi:10.1039/d2qo00164k), 2022-01-01
Supplement: d2qo00164k1.pdf [file d2qo00164k1.pdf]

*Supplementary Information for*

## **Rhodium(I)-Catalyzed C-S Bond Formation via Enantioselective Carbenoid S-H Insertion: Catalytic Asymmetric Synthesis of $\alpha$ - Thioesters**

Yu-Tuo Sun,<sup>a,b</sup> Xiaofeng Rao,<sup>a</sup> Weici Xu,<sup>a</sup> and Ming-Hua Xu\*<sup>a</sup>

<sup>a</sup> *Shenzhen Grubbs Institute and Department of Chemistry, Guangdong Provincial Key Laboratory of Catalysis, Southern University of Science and Technology, 1088 Xueyuan Boulevard, Shenzhen 518055, China. Email: xumh@sustech.edu.cn.*

<sup>b</sup> *Shanghai Institute of Materia Medica, Chinese Academy of Sciences, 555 Zuchongzhi Road, Shanghai 201203, China.*

### **Contents**

|                                                                       |     |
|-----------------------------------------------------------------------|-----|
| 1. General information .....                                          | S2  |
| 2. General procedure for Rh(I)-catalyzed S-H insertion reaction ..... | S2  |
| 3. Gram-scale synthesis of <b>3a</b> .....                            | S11 |
| 4. The synthesis of <b>4a</b> .....                                   | S11 |
| 5. The effect of adding an external proton source .....               | S12 |
| 6. Computational Details .....                                        | S13 |
| 7. Crystal structure of compound <b>3a</b> .....                      | S25 |
| 8. NMR spectra .....                                                  | S26 |
| 7. HPLC spectra .....                                                 | S53 |

## 1. General information

All reactions were carried out in dry solvents under argon atmosphere unless otherwise noted. Solvents were dried and distilled before use according to the standard methods. The progress of reactions was monitored by thin layer chromatography to ensure that the reactions had reached completion. NMR spectra were recorded on Varian spectrometers (400 MHz for  $^1\text{H}$ , and 100 MHz for  $^{13}\text{C}$ ). Chemical shifts are reported in  $\delta$  (ppm) referenced to an internal  $\text{SiMe}_4$  standard for  $^1\text{H}$  NMR and chloroform-*d* ( $\delta$  77.16) for  $^{13}\text{C}$  NMR. MS and HRMS were measured in EI or ESI mode, and the mass analyzer type used for HRMS was Magnetic Sector. Chiral HPLC was performed on a SIMADZU 2030C instrument by using Daicel chiral columns with *n*-hexane/*i*-propanol as the eluent at 220 nm. Diazo substrates were prepared according to the literature procedure.

## 2. General procedure for Rh-catalyzed S-H insertion reaction

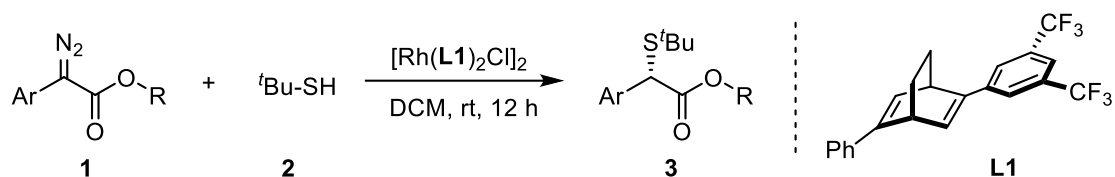

A solution of catalyst  $[\text{Rh}(\text{L1})\text{Cl}]_2$  (2.5 mol%, 2.6 mg, 0.005 mmol of  $[\text{Rh}]$ ) in 1 mL of DCM was added into substrate **1** (0.15 mmol), **2** (0.1 mmol) at ambient temperature under argon. After being stirred at ambient temperature for 12 h, the solvent was evaporated in vacuo. The desired product **3** was afforded after purification of the residue by column chromatography.

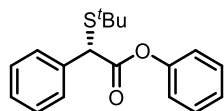

phenyl (*S*)-2-(*tert*-butylthio)-2-phenylacetate (**3a**).

Yellow solid (90% yield);  $[\alpha]_{\text{D}}^{25} +27.0$  (*c* 1.2  $\text{CHCl}_3$ ) for 70% ee;  $^1\text{H}$  NMR (400 MHz,  $\text{CDCl}_3$ )  $\delta$  7.57 (d,  $J = 7.5$  Hz, 2H), 7.35 (m,  $J = 15.8, 8.1$  Hz, 5H), 7.29 - 7.03 (m, 2H),

7.03 - 6.99 (m, 1H), 4.80 (s, 1H), 1.42 (s, 9H);  $^{13}\text{C}$  NMR (101 MHz,  $\text{CDCl}_3$ )  $\delta$  170.7, 150.9, 137.0, 129.5, 129.0, 128.6, 128.2, 126.1, 121.3, 50.2, 45.2, 31.2; HRMS (EI) for  $\text{C}_{18}\text{H}_{20}\text{O}_2\text{S}$   $[\text{M}]^+$ : calcd. 300.1179, found 300.1185.

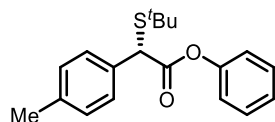

phenyl (*S*)-2-(*tert*-butylthio)-2-(*p*-tolyl)acetate (**3b**).

Yellow solid (94% yield);  $[\alpha]_{\text{D}}^{25}$  +35.9 (*c* 1.0  $\text{CHCl}_3$ ) for 61% ee;  $^1\text{H}$  NMR (400 MHz,  $\text{CDCl}_3$ )  $\delta$  7.46 (d,  $J = 7.9$  Hz, 2H), 7.35 (d,  $J = 7.9$  Hz, 2H), 7.19 (t,  $J = 7.8$  Hz, 3H), 7.04 (d,  $J = 7.8$  Hz, 2H), 4.78 (s, 1H), 2.35 (s, 3H), 1.42 (s, 9H);  $^{13}\text{C}$  NMR (101 MHz,  $\text{CDCl}_3$ )  $\delta$  170.9, 151.0, 138.1, 134.0, 129.7, 129.5, 128.4, 126.1, 121.4, 49.9, 45.2, 31.2, 21.3; HRMS (EI) for  $\text{C}_{19}\text{H}_{22}\text{O}_2\text{S}$   $[\text{M}]^+$ : calcd. 314.1335, found 314.1341.

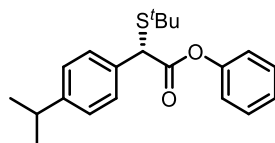

phenyl (*S*)-2-(*tert*-butylthio)-2-(4-isopropylphenyl)acetate (**3c**)

Yellow solid (95% yield);  $[\alpha]_{\text{D}}^{25}$  +17.0 (*c* 0.9  $\text{CHCl}_3$ ) for 77% ee;  $^1\text{H}$  NMR (400 MHz,  $\text{CDCl}_3$ )  $\delta$  7.47 (d,  $J = 8.0$  Hz, 2H), 7.34 (t,  $J = 7.8$  Hz, 2H), 7.19 - 7.23 (m, 3H), 7.04 - 7.07 (m, 2H), 4.78 (s, 1H), 2.87 - 2.94 (m, 1H), 1.43 (s, 9H), 1.24 (d,  $J = 6.8$  Hz, 6H);  $^{13}\text{C}$  NMR (101 MHz,  $\text{CDCl}_3$ )  $\delta$  170.0, 150.9, 148.9, 134.1, 129.5, 128.4, 127.0, 126.1, 121.4, 49.9, 45.2, 34.0, 31.2, 24.0; HRMS (ESI) for  $\text{C}_{21}\text{H}_{26}\text{NaO}_2\text{S}$   $[\text{M}+\text{Na}]^+$ : calcd. 365.1546, found 365.1545.

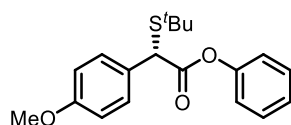

phenyl (*S*)-2-(*tert*-butylthio)-2-(4-methoxyphenyl)acetate (**3d**).

Yellow solid (89% yield);  $[\alpha]_{\text{D}}^{25}$  +24.2 (*c* 1.0  $\text{CHCl}_3$ ) for 82% ee;  $^1\text{H}$  NMR (400 MHz,

CDCl<sub>3</sub>)  $\delta$  7.49 (d,  $J$  = 6.6 Hz, 2H), 7.35 (t,  $J$  = 6.9 Hz, 2H), 7.21 (t,  $J$  = 6.9 Hz, 1H), 7.04 (d,  $J$  = 8.2 Hz, 2H), 6.90 (d,  $J$  = 6.7 Hz, 2H), 4.77 (s, 1H), 3.81 (s, 3H), 1.42 (s, 9H); <sup>13</sup>C NMR (101 MHz, CDCl<sub>3</sub>)  $\delta$  170.9, 159.6, 151.0, 129.7, 129.5, 129.0, 126.1, 121.4, 114.4, 55.4, 49.5, 45.1, 31.2; HRMS (EI) for C<sub>19</sub>H<sub>22</sub>O<sub>3</sub>S [M]<sup>+</sup> calcd. 330.1284, found 330.1291.

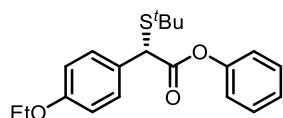

phenyl (*S*)-2-(tert-butylthio)-2-(4-ethoxyphenyl)acetate (**3e**)

Yellow solid (90% yield); [ $\alpha$ ]<sub>D</sub><sup>25</sup> +36.7 (*c* 0.98 CHCl<sub>3</sub>) for 79% ee; <sup>1</sup>H NMR (400 MHz, CDCl<sub>3</sub>)  $\delta$  7.47 (d,  $J$  = 8.8 Hz, 2H), 7.34 (t,  $J$  = 8.0 Hz, 2H), 7.20 (t,  $J$  = 7.8 Hz, 2H), 7.04 (d,  $J$  = 7.8 Hz, 2H), 6.88 (d,  $J$  = 8.8 Hz, 2H), 4.76 (s, 1H), 4.03 (dd,  $J$  = 6.8, 7.2 Hz, 2H), 1.41 (s, 9H), 1.39 - 1.42 (m, 3H); <sup>13</sup>C NMR (101 MHz, CDCl<sub>3</sub>)  $\delta$  170.9, 158.9, 151.0, 129.7, 129.5, 128.8, 126.0, 121.4, 114.9, 63.6, 49.6, 45.1, 31.2, 15.0; HRMS (ESI) for C<sub>20</sub>H<sub>24</sub>NaO<sub>3</sub>S [M+Na]<sup>+</sup>: calcd. 367.1338, found 367.1341.

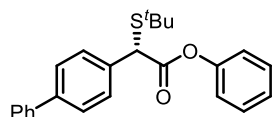

phenyl (*S*)-2-([1,1'-biphenyl]-4-yl)-2-(tert-butylthio)acetate (**3f**)

Yellow solid (79% yield); [ $\alpha$ ]<sub>D</sub><sup>25</sup> +27.0 (*c* 0.96 CHCl<sub>3</sub>) for 63% ee; <sup>1</sup>H NMR (400 MHz, CDCl<sub>3</sub>)  $\delta$  7.64 (d,  $J$  = 8.4, Hz, 2H), 7.58 - 7.60 (m, 4H), 7.44 (t,  $J$  = 7.6, Hz, 2H), 7.34 - 7.38 (m, 3H), 7.22 (t,  $J$  = 7.8, Hz, 1H), 7.07 (d,  $J$  = 8.0, Hz, 2H), 4.84 (s, 1H), 1.45 (s, 9H); <sup>13</sup>C NMR (101 MHz, CDCl<sub>3</sub>)  $\delta$  170.8, 151.0, 141.2, 140.7, 136.0, 129.6, 129.0, 128.9, 127.7, 127.6, 127.3, 126.2, 121.4, 49.9, 45.4, 31.2; HRMS (ESI) for C<sub>24</sub>H<sub>24</sub>NaO<sub>2</sub>S [M+Na]<sup>+</sup>: calcd. 399.1389, found 399.1390.

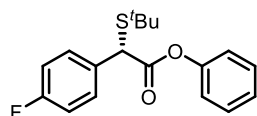

phenyl (*S*)-2-(tert-butylthio)-2-(4-fluorophenyl)acetate (**3g**).

Yellow solid (85% yield);  $[\alpha]_{\text{D}}^{25} +24.9$  (*c* 0.9 CHCl<sub>3</sub>) for 68% ee; <sup>1</sup>H NMR (400 MHz, CDCl<sub>3</sub>)  $\delta$  7.55 (dd, *J* = 8.7, 5.3 Hz, 2H), 7.42 - 7.32 (m, 2H), 7.22 (s, 1H), 7.11 - 7.01 (m, 4H), 4.78 (s, 1H), 1.41 (s, 9H); <sup>13</sup>C NMR (101 MHz, CDCl<sub>3</sub>)  $\delta$  170.6, 162.8 (d, *J* = 245.8 Hz), 150.9, 133.0, 130.4, 130.3, 130.0, 126.2, 121.3, 116.0, 115.8, 49.4, 45.4, 31.2; <sup>19</sup>F NMR (400 MHz, CDCl<sub>3</sub>)  $\delta$  -113.9; HRMS (EI) for C<sub>18</sub>H<sub>19</sub>FO<sub>2</sub>S [M]<sup>+</sup>: calcd. 318.1084, found 318.1091.

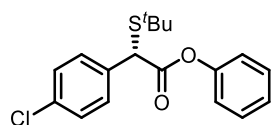

phenyl (*S*)-2-(*tert*-butylthio)-2-(4-chlorophenyl)acetate (**3h**).

Yellow solid (88% yield);  $[\alpha]_{\text{D}}^{25} +22.2$  (*c* 1.1 CHCl<sub>3</sub>) for 46% ee; <sup>1</sup>H NMR (400 MHz, CDCl<sub>3</sub>)  $\delta$  7.51 (d, *J* = 8.5 Hz, 2H), 7.35 (d, *J* = 8.4 Hz, 4H), 7.23 (d, *J* = 7.4 Hz, 1H), 7.04 (dd, *J* = 8.6, 1.2 Hz, 2H), 4.76 (s, 1H), 1.41 (s, 9H); <sup>13</sup>C NMR (101 MHz, CDCl<sub>3</sub>)  $\delta$  170.3, 150.8, 135.8, 134.2, 130.0, 129.6, 129.1, 126.2, 121.3, 49.5, 45.5, 31.2; HRMS (EI) for C<sub>18</sub>H<sub>19</sub>ClO<sub>2</sub>S [M]<sup>+</sup>: calcd. 334.0789, found 334.0795.

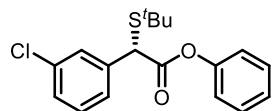

phenyl (*S*)-2-(*tert*-butylthio)-2-(3-chlorophenyl)acetate (**3i**).

Yellow solid (85% yield);  $[\alpha]_{\text{D}}^{25} +9.4$  (*c* 2.2 CHCl<sub>3</sub>) for 40% ee; <sup>1</sup>H NMR (400 MHz, CDCl<sub>3</sub>)  $\delta$  7.59 (s, 1H), 7.46 (d, *J* = 3.8 Hz, 1H), 7.36 (t, *J* = 7.8 Hz, 2H), 7.31 (d, *J* = 5.0 Hz, 2H), 7.23 (t, *J* = 7.4 Hz, 1H), 7.06 (d, *J* = 7.6 Hz, 2H), 4.75 (s, 1H), 1.42 (s, 9H); <sup>13</sup>C NMR (101 MHz, CDCl<sub>3</sub>)  $\delta$  170.2, 150.8, 139.1, 134.7, 130.1, 129.6, 128.8, 128.5, 126.8, 126.13, 121.3, 49.7, 45.54, 31.1. HRMS (EI) for C<sub>18</sub>H<sub>19</sub>ClO<sub>2</sub>S [M]<sup>+</sup> calcd. 334.0789, found 334.0793.

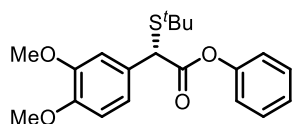

phenyl (*S*)-2-(*tert*-butylthio)-2-(3,4-dimethoxyphenyl)acetate (**3j**).

Yellow solid (98% yield);  $[\alpha]_{\text{D}}^{25} +46.1$  (*c* 1.2 CHCl<sub>3</sub>) for 71% ee; <sup>1</sup>H NMR (400 MHz, CDCl<sub>3</sub>)  $\delta$  7.35 (t, *J* = 7.9 Hz, 2H), 7.21 (t, *J* = 7.4 Hz, 1H), 7.14 (d, *J* = 2.1 Hz, 1H), 7.09 (dd, *J* = 8.3, 2.1 Hz, 1H), 7.07 - 7.02 (m, 2H), 6.84 (d, *J* = 8.3 Hz, 1H), 4.77 (s, 1H), 3.90 (s, 3H), 3.87 (s, 3H), 1.42 (s, 9H); <sup>13</sup>C NMR (101 MHz, CDCl<sub>3</sub>)  $\delta$  170.8, 150.9, 149.3, 149.0, 129.5, 129.2, 126.1, 121.3, 120.8, 111.4, 111.1, 56.0, 56.0, 49.8, 45.1, 31.1; HRMS (EI) for C<sub>20</sub>H<sub>24</sub>O<sub>4</sub>S [M]<sup>+</sup>: calcd. 360.1390, found 360.1396.

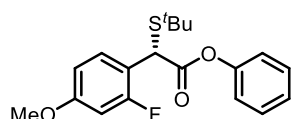

phenyl (*S*)-2-(*tert*-butylthio)-2-(2-fluoro-4-methoxyphenyl)acetate (**3k**)

Yellow solid (87% yield);  $[\alpha]_{\text{D}}^{25} +11.3$  (*c* 1.05 CHCl<sub>3</sub>) for 60% ee; <sup>1</sup>H NMR (400 MHz, CDCl<sub>3</sub>)  $\delta$  7.64 (d, *J* = 8.8 Hz, 1H), 7.35 (t, *J* = 8.4 Hz, 2H), 7.22 (t, *J* = 7.6 Hz, 1H), 7.08 (d, *J* = 7.8 Hz, 2H), 6.73 (dd, *J* = 8.8, 2.4 Hz, 1H), 6.63 (dd, *J* = 7.8, 2.4 Hz, 1H), 5.07 (s, 1H), 3.80 (s, 1H), 1.41 (s, 9H); <sup>13</sup>C NMR (101 MHz, CDCl<sub>3</sub>)  $\delta$  170.3, 159.8 (d, *J* = 181.8 Hz) 151.0, 130.9, 130.9, 129.5, 126.1, 121.4, 116.6, 110.7, 101.7, 101.4, 55.8, 45.4, 41.6, 31.0; <sup>19</sup>F NMR (400 MHz, CDCl<sub>3</sub>)  $\delta$  -115.6; HRMS (ESI) for C<sub>19</sub>H<sub>21</sub>FNaO<sub>3</sub>S [M+Na]<sup>+</sup>: calcd. 371.1088, found 371.1086.

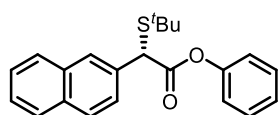

phenyl (*S*)-2-(*tert*-butylthio)-2-(naphthalen-2-yl)acetate (**3l**).

Yellow solid (90% yield);  $[\alpha]_{\text{D}}^{25} +21.4$  (*c* 1.0 CHCl<sub>3</sub>) for 50% ee; <sup>1</sup>H NMR (400 MHz, CDCl<sub>3</sub>)  $\delta$  8.02 (s, 1H), 7.88 - 7.79 (m, 3H), 7.71 (dd, *J* = 8.5, 1.7 Hz, 1H), 7.50 - 7.43 (m, 2H), 7.32 (t, *J* = 7.9 Hz, 2H), 7.18 (t, *J* = 7.4 Hz, 1H), 7.04 (d, *J* = 7.6 Hz, 2H), 4.98 (s, 1H), 1.43 (s, 9H); <sup>13</sup>C NMR (101 MHz, CDCl<sub>3</sub>)  $\delta$  170.6, 150.9, 134.4, 133.4, 133.1, 129.5, 128.8, 128.1, 127.8, 127.4, 126.5, 126.5, 126.4, 126.1, 121.3, 50.4, 45.3, 31.2; HRMS (EI) for C<sub>22</sub>H<sub>22</sub>O<sub>2</sub>S [M]<sup>+</sup>: calcd. 350.1335, found 350.1340.

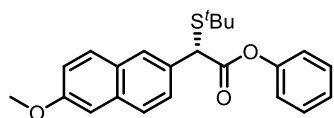

phenyl (*S*)-2-(*tert*-butylthio)-2-(6-methoxynaphthalen-2-yl)acetate (**3m**)

Yellow solid (93% yield);  $[\alpha]_{\text{D}}^{25} +53.7$  (*c* 0.9 CHCl<sub>3</sub>) for 78% ee; <sup>1</sup>H NMR (400 MHz, CDCl<sub>3</sub>)  $\delta$  7.93 (s, 1H), 7.74 (t, *J* = 7.2 Hz, 2H), 7.65 (dd, *J* = 8.8, 1.6 Hz, 2H), 7.34 (t, *J* = 6.0 Hz, 2H), 7.12 -7.24 (m, 3H), 7.03 (d, *J* = 8.4 Hz, 2H), 4.94 (s, 1H), 3.91 (s, 1H), 1.43 (s, 1H); <sup>13</sup>C NMR (101 MHz, CDCl<sub>3</sub>)  $\delta$  170.8, 158.2, 150.9, 134.4, 132.0, 129.7, 129.5, 127.7, 127.3, 126.9, 126.1, 121.4, 119.3, 105.8, 55.5, 50.3, 45.3, 31.2; HRMS (ESI) for C<sub>23</sub>H<sub>24</sub>NaO<sub>3</sub>S [M+Na]<sup>+</sup>: calcd. 403.1338, found 403.1337.

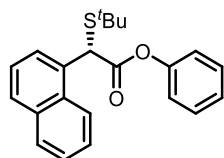

phenyl (*S*)-2-(*tert*-butylthio)-2-(naphthalen-1-yl)acetate (**3n**)

Yellow solid (79% yield);  $[\alpha]_{\text{D}}^{25} +6.7$  (*c* 0.95 CHCl<sub>3</sub>) for 51% ee; <sup>1</sup>H NMR (600 MHz, CDCl<sub>3</sub>)  $\delta$  8.27 (d, *J* = 6.8 Hz, 1H), 7.93 (d, *J* = 7.2 Hz, 1H), 7.90 (d, *J* = 7.8 Hz, 1H), 7.84 (d, *J* = 7.8 Hz, 1H), 7.61 (t, *J* = 7.2 Hz, 1H), 7.49 - 7.54 (m, 2H), 7.31 (t, *J* = 7.8 Hz, 2H), 7.18 (t, *J* = 7.2 Hz, 1H), 6.98 (d, *J* = 7.2 Hz, 1H), 5.55 (s, 1 H), 1.47 (s, 9H); <sup>13</sup>C NMR (101 MHz, CDCl<sub>3</sub>)  $\delta$  170.9, 151.1, 134.2, 132.6, 131.1, 129.5, 129.3, 129.0, 127.2, 126.9, 125.8, 123.0, 121.3 121.3, 46.6, 45.4, 31.2; HRMS (ESI) for C<sub>22</sub>H<sub>22</sub>NaO<sub>2</sub>S [M+Na]<sup>+</sup>: calcd. 373.1233, found 373.1232.

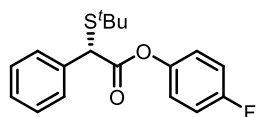

4-fluorophenyl (*S*)-2-(*tert*-butylthio)-2-phenylacetate (**3o**).

Yellow solid (93% yield);  $[\alpha]_{\text{D}}^{25} +20.4$  (*c* 3.9 CHCl<sub>3</sub>) for 54% ee; <sup>1</sup>H NMR (400 MHz, CDCl<sub>3</sub>)  $\delta$  7.56 (d, *J* = 7.7 Hz, 2H), 7.40 - 7.30 (m, 3H), 7.06 - 6.99 (m, 4H), 4.79 (s, 1H), 1.42 (s, 9H). <sup>13</sup>C NMR (101 MHz, CDCl<sub>3</sub>)  $\delta$  170.8, 160.4 (d, *J* = 243 Hz), 146.7, 136.9, 129.0, 128.5, 128.3, 122.8 (d, *J* = 9 Hz), 116.2 (d, *J* = 23.3 Hz), 50.1, 45.3, 31.1; <sup>19</sup>F NMR (400 MHz, CDCl<sub>3</sub>)  $\delta$  -116.7; HRMS (EI) for C<sub>18</sub>H<sub>19</sub>FO<sub>2</sub>S [M]<sup>+</sup>: calcd.

318.1084, found 318.1091

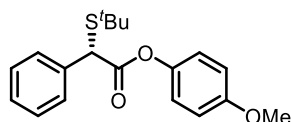

4-methoxyphenyl (*S*)-2-(*tert*-butylthio)-2-phenylacetate (**3p**).

Yellow solid (94% yield);  $[\alpha]_{\text{D}}^{25} +24.1$  (*c* 1.0 CHCl<sub>3</sub>) for 51% ee; <sup>1</sup>H NMR (400 MHz, CDCl<sub>3</sub>)  $\delta$  7.56 (d, *J* = 7.6 Hz, 2H), 7.39 - 7.31 (m, 3H), 6.96 (d, *J* = 7.2 Hz, 2H), 6.85 (d, *J* = 7.2 Hz, 2H), 4.79 (s, 1H), 3.78 (s, 3H), 1.42 (s, 9H); <sup>13</sup>C NMR (101 MHz, CDCl<sub>3</sub>)  $\delta$  171.0, 157.5, 144.4, 137.1, 128.9, 128.6, 128.2, 122.1, 114.5, 55.7, 50.2, 45.2, 31.2; HRMS (EI) for C<sub>19</sub>H<sub>22</sub>O<sub>3</sub>S [M]<sup>+</sup>: calcd. 330.1284, found 330.1291.

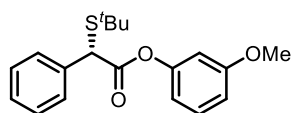

3-methoxyphenyl (*S*)-2-(*tert*-butylthio)-2-phenylacetate (**3q**).

Yellow solid (83% yield);  $[\alpha]_{\text{D}}^{25} +18.9$  (*c* 3.3 CHCl<sub>3</sub>) for 68% ee; <sup>1</sup>H NMR (400 MHz, CDCl<sub>3</sub>)  $\delta$  7.56 (d, *J* = 7.9 Hz, 2H), 7.37 (t, *J* = 6.8 Hz, 2H), 7.32 (d, *J* = 6.9 Hz, 1H), 7.26 - 7.21 (m, 1H), 6.76 (d, *J* = 8.3 Hz, 1H), 6.65 (d, *J* = 8.0 Hz, 1H), 6.60 (s, 1H), 4.79 (s, 1H), 3.77 (s, 3H), 1.42 (s, 9H); <sup>13</sup>C NMR (101 MHz, CDCl<sub>3</sub>)  $\delta$  170.6, 160.6, 151.9, 137.0, 129.9, 129.0, 128.6, 128.3, 113.5, 111.9, 107.5, 55.6, 50.2, 45.2, 31.2; HRMS (EI) calcd. for C<sub>19</sub>H<sub>22</sub>O<sub>3</sub>S [M]<sup>+</sup>: 330.1284, found 330.1290.

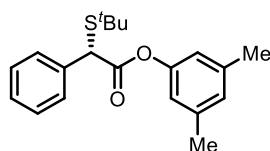

phenyl (*S*)-2-(4-bromophenyl)-2-(*tert*-butylthio)acetate (**3r**).

Yellow solid (78% yield);  $[\alpha]_{\text{D}}^{25} +23.1$  (*c* 1.6 CHCl<sub>3</sub>) for 74% ee; <sup>1</sup>H NMR (400 MHz, CDCl<sub>3</sub>)  $\delta$  7.57 (d, *J* = 7.1 Hz, 2H), 7.41 - 7.28 (m, 3H), 6.84 (s, 1H), 6.65 (s, 2H), 4.78 (s, 1H), 2.29 (s, 6H), 1.42 (s, 9H); <sup>13</sup>C NMR (101 MHz, CDCl<sub>3</sub>)  $\delta$  170.9, 150.8, 139.4, 137.2, 128.9, 128.6, 127.8, 118.8, 50.2, 45.2, 31.2, 21.3; HRMS (ESI) for C<sub>20</sub>H<sub>25</sub>O<sub>2</sub>S



[M+H]<sup>+</sup>: calcd. 329.1570, found 329.1564.

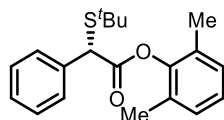

2,6-dimethylphenyl (*S*)-2-(*tert*-butylthio)-2-phenylacetate (**3s**).

Yellow solid (59% yield);  $[\alpha]_D^{25}$  -20.6 (*c* 1.6 CHCl<sub>3</sub>) for 30% ee; <sup>1</sup>H NMR (400 MHz, CDCl<sub>3</sub>)  $\delta$  7.62 (d, *J* = 7.2 Hz, 2H), 7.42 - 7.29 (m, 3H), 6.99 (s, 3H), 4.83 (d, *J* = 1.8 Hz, 1H), 1.94 (s, 6H), 1.39 (s, 9H); <sup>13</sup>C NMR (101 MHz, CDCl<sub>3</sub>)  $\delta$  169.3, 148.0, 137.9, 130.5, 128.8, 128.7, 128.2, 126.0, 50.5, 45.2, 31.3, 16.2; HRMS (EI) for C<sub>20</sub>H<sub>24</sub>O<sub>2</sub>S [M]<sup>+</sup>: calcd. 328.1492, found 328.1497.

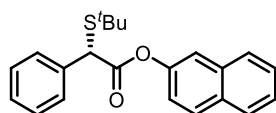

naphthalen-2-yl (*S*)-2-(*tert*-butylthio)-2-phenylacetate (**3t**).

Yellow solid (99% yield);  $[\alpha]_D^{25}$  +21.5 (*c* 1.0 CHCl<sub>3</sub>) for 59% ee; <sup>1</sup>H NMR (400 MHz, CDCl<sub>3</sub>)  $\delta$  7.83 (d, *J* = 8.8 Hz, 2H), 7.80-7.75 (m, 1H), 7.62 (d, *J* = 7.3 Hz, 2H), 7.53 (d, *J* = 2.0 Hz, 1H), 7.49 - 7.45 (m, 2H), 7.41 (t, *J* = 7.4 Hz, 2H), 7.35 (d, *J* = 7.1 Hz, 1H), 7.18 (dd, *J* = 8.9, 2.2 Hz, 1H), 4.87 (s, 1H), 1.46 (s, 9H); <sup>13</sup>C NMR (101 MHz, CDCl<sub>3</sub>)  $\delta$  170.9, 148.6, 137.1, 133.8, 131.7, 129.6, 129.0, 128.6, 128.3, 127.9, 127.8, 126.7, 125.9, 120.8, 118.4, 50.3, 45.3, 31.2; HRMS (EI) calcd. for C<sub>22</sub>H<sub>22</sub>O<sub>2</sub>S [M]<sup>+</sup>: 350.1335, found 350.1340.

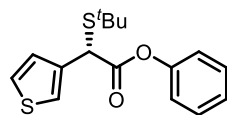

phenyl (*S*)-2-(*tert*-butylthio)-2-(thiophen-3-yl)acetate (**3u**)

Yellow oil (75% yield);  $[\alpha]_D^{25}$  +10.5 (*c* 1.0 CHCl<sub>3</sub>) for 40% ee; <sup>1</sup>H NMR (400 MHz, CDCl<sub>3</sub>)  $\delta$  7.45 (d, *J* = 2.4 Hz, 1H), 7.40 (t, *J* = 7.6 Hz, 2H), 7.36 (dd, *J* = 7.8 Hz, dd, *J* = 2.8 Hz, 1H), 7.28 (d, *J* = 6.2 Hz, 1H), 7.25 (t, *J* = 7.8 Hz, 1H), 7.10 (d, *J* = 7.6 Hz, 1H), 4.93 (d, *J* = 1.8 Hz, 1H), 1.46 (s, 9H); <sup>13</sup>C NMR (101 MHz, CDCl<sub>3</sub>)  $\delta$  170.6, 150.9,

136.7, 129.6, 127.7, 126.5, 126.2, 123.5, 121.3, 45.4, 45.3, 31.1; HRMS (ESI) for  $C_{16}H_{18}NaO_2S_2$   $[M+Na]^+$ : calcd. 329.0640, found 329.0637.

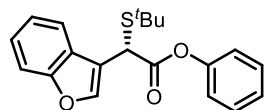

phenyl (*S*)-2-(benzofuran-3-yl)-2-(tert-butylthio)acetate (**3v**)

White solid (91% yield);  $[\alpha]_D^{25}$  -12.9 (*c* 1.0  $CHCl_3$ ) for 58% ee;  $^1H$  NMR (400 MHz,  $CDCl_3$ )  $\delta$  7.78 (s, 1H), 7.77 (d,  $J$  = 8.0 Hz, 1H), 7.39-7.32 (m, 3 H), 7.29 (t,  $J$  = 8.0 Hz, 1H), 7.23 (t,  $J$  = 7.6 Hz, 1H), 7.07 (d,  $J$  = 7.6 Hz, 1H), 4.95 (s, 1H), 1.49 (s, 9H);  $^{13}C$  NMR (101 MHz,  $CDCl_3$ )  $\delta$  170.4, 155.7, 150.8, 143.7, 129.6, 126.3, 126.2, 125.0, 123.0, 121.3, 120.3, 116.8, 111.9, 45.4, 40.7, 31.1; HRMS (ESI) for  $C_{20}H_{20}NaO_3S$   $[M+Na]^+$ : calcd. 363.1025, found 363.1023.

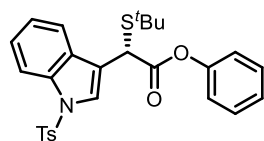

phenyl (*S*)-2-(tert-butylthio)-2-(1-tosyl-1H-indol-3-yl)acetate (**3w**)

White solid (78% yield);  $[\alpha]_D^{25}$  -46.6 (*c* 1.0  $CHCl_3$ ) for 69% ee;  $^1H$  NMR (600 MHz,  $CDCl_3$ )  $\delta$  7.99 (d,  $J$  = 8.2 Hz, 1H), 7.82 (s, 1H), 7.75 (d,  $J$  = 7.8 Hz, 2H), 7.69 (d,  $J$  = 7.8 Hz, 1H), 7.36-7.33 (m, 3H), 7.27 (t,  $J$  = 7.2 Hz, 1H), 7.22 (t,  $J$  = 7.2 Hz, 1H), 7.18 (d,  $J$  = 7.8 Hz, 2H), 7.01 (d,  $J$  = 7.8 Hz, 2H), 4.94 (s, 1H), 2.31 (s, 1H), 1.45 (s, 9H);  $^{13}C$  NMR (101 MHz,  $CDCl_3$ )  $\delta$  170.3, 150.8, 145.2, 135.5, 135.2, 130.0, 129.6, 129.1, 127.0, 125.7, 125.3, 123.6, 121.3, 120.0, 118.2, 114.0, 45.4, 41.6, 31.1, 21.7; HRMS (ESI) for  $C_{27}H_{27}NNaO_4S_2$   $[M+Na]^+$ : calcd. 516.1274, found 516.1271.

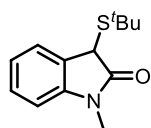

3-(*tert*-butylthio)-1-methylindolin-2-one (**3x**)

Pink solid (98% yield);  $^1H$  NMR (400 MHz,  $CDCl_3$ )  $\delta$  7.40 (d,  $J$  = 7.6 Hz, 1H), 7.30 (t,

$J = 8.8$  Hz, 1H), 7.09 (d,  $J = 8.0$  Hz, 1H), 6.81 (d,  $J = 7.6$  Hz, 1H), 4.30 (s, 1H), 3.23 (s, 2H), 1.52 (s, 9H);  $^{13}\text{C}$  NMR (101 MHz,  $\text{CDCl}_3$ )  $\delta$  176.5, 143.9, 128.9, 127.7, 125.5, 122.9, 108.2, 45.1, 44.3, 31.9, 26.7; HRMS (ESI) for  $\text{C}_{13}\text{H}_{18}\text{NOS}$   $[\text{M}+\text{H}]^+$ : calcd. 236.1104, found 236.1102.

### 3. Gram-scale synthesis of **3a**

A solution of catalyst  $[\text{Rh}(\text{L1})\text{Cl}]_2$  (2.5 mol%, 106.5 mg, 0.2 mmol of  $[\text{Rh}]$ ) in 20 mL of DCM was added into substrate **1a** (6.0 mmol, 1.4 g), *tert*-butyl mercaptan (4.0 mmol) at ambient temperature under argon. After being stirred at ambient temperature for 12 h, the solvent was evaporated in vacuo. The desired product **3a** was afforded after purification of the residue by column chromatography (PE/EA = 200/1). 0.93 g **3a** was obtained (77% yield, 70% ee). The optical purity was improved to 95% ee after simple recrystallization from MTBE under  $-20$  °C.

### 4. The synthesis of **4a**

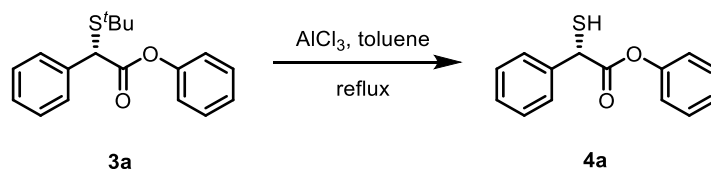

Substrate **3a** (0.2 mmol, 60 mg, 95% ee) and  $\text{AlCl}_3$  (0.4 mmol, 53.2 mg) was solved in 2.0 mL toluene under argon atmosphere. After being stirred at  $80$  °C for 5 minutes, the mixture was evaporated in vacuo. The residue was purified by column chromatography as a white solid **4a** (43.5 mg, 89% yield, 95% ee).

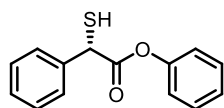

phenyl (*S*)-2-mercapto-2-phenylacetate (**4a**).

Yellow solid (89% yield);  $^1\text{H}$  NMR (400 MHz,  $\text{CDCl}_3$ )  $\delta$  7.55 (d,  $J = 7.3$  Hz, 2H), 7.45-7.29 (m, 5H), 7.24 (d,  $J = 7.2$  Hz, 1H), 7.06 (d,  $J = 7.6$  Hz, 2H), 4.91 (d,  $J = 7.9$  Hz, 1H), 2.72 (d,  $J = 7.9$  Hz, 1H);  $^{13}\text{C}$  NMR (101 MHz,  $\text{CDCl}_3$ )  $\delta$  170.2, 150.8, 137.8, 129.6,

129.1, 128.6, 128.0, 126.3, 121.3, 45.9; HRMS (EI) for C<sub>14</sub>H<sub>12</sub>O<sub>2</sub>S [M]<sup>+</sup> calcd. 244.0553, found 244.0555.

## 5. The effect of adding an external proton source

**Table S1**<sup>a</sup>

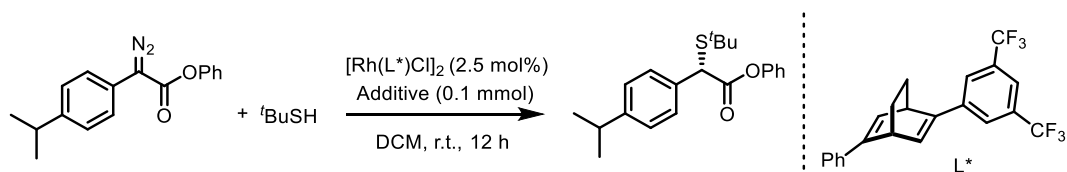

| Entry | Additive         | Yield [%] <sup>b</sup> | ee [%] <sup>c</sup> |
|-------|------------------|------------------------|---------------------|
| 1     | none             | 95                     | 77                  |
| 2     | Benzyl acid      | 48                     | 13                  |
| 3     |                  | 26                     | 18                  |
| 4     |                  | 19                     | 20                  |
| 5     | Phenol           | 65                     | 74                  |
| 6     | H <sub>2</sub> O | 73                     | 77                  |

<sup>a</sup> Conditions: diazo compound (0.15 mmol), *tert*-butyl mercaptan (0.1 mmol), [Rh(L1)Cl]<sub>2</sub> (2.5 mol%) and additive (0.1 mmol) in DCM (2.0 mL) for 12 h at 25 °C; <sup>b</sup> isolated yields; <sup>c</sup> ee determined by chiral HPLC analysis.

## 6. Computational Details

We performed DFT calculations using Gaussian 16. All calculations were performed at M06/def2svp level with solvent (DCM) corrections under 298 K. All reported Gibbs free energies throughout the text are in kcal/mol after correction. Structures were generated using CYLview software.

References:

[1] Gaussian 16, Revision A.03, M. J. Frisch, G. W. Trucks, H. B. Schlegel, G. E. Scuseria, M. A. Robb, J. R. Cheeseman, G. Scalmani, V. Barone, G. A. Petersson, H. Nakatsuji, X. Li, M. Caricato, A. V. Marenich, J. Bloino, B. G. Janesko, R. Gomperts, B. Mennucci, H. P. Hratchian, J. V. Ortiz, A. F. Izmaylov, J. L. Sonnenberg, D. Williams-Young, F. Ding, F. Lipparini, F. Egidi, J. Goings, B. Peng, A. Petrone, T. Henderson, D. Ranasinghe, V. G. Zakrzewski, J. Gao, N. Rega, G. Zheng, W. Liang, M. Hada, M. Ehara, K. Toyota, R. Fukuda, J. Hasegawa, M. Ishida, T. Nakajima, Y. Honda, O. Kitao, H. Nakai, T. Vreven, K. Throssell, J. A. Montgomery, Jr., J. E. Peralta, F. Ogliaro, M. J. Bearpark, J. J. Heyd, E. N. Brothers, K. N. Kudin, V. N. Staroverov, T. A. Keith, R. Kobayashi, J. Normand, K. Raghavachari, A. P. Rendell, J. C. Burant, S. S. Iyengar, J. Tomasi, M. Cossi, J. M. Millam, M. Klene, C. Adamo, R. Cammi, J. W. Ochterski, R. L. Martin, K. Morokuma, O. Farkas, J. B. Foresman, and D. J. Fox, Gaussian, Inc., Wallingford CT, 2016.

[2] CYLview, 1.0b; Legault, C. Y., Université de Sherbrooke, 2009 (<http://www.cylview.org>).

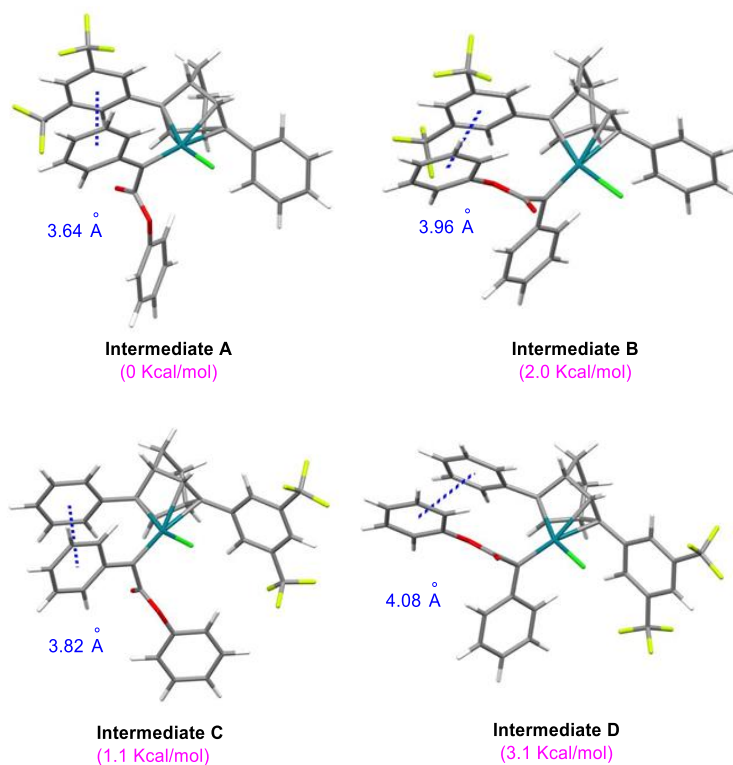

**Figure S1.** Computed energies of intermediates A~D

**Table S2.** Summary of computed energies of intermediates A~D

| Intermediate          | G (Hartree)  | $\Delta G$ (Hartree) | $\Delta G$ (Kcal/mol) |
|-----------------------|--------------|----------------------|-----------------------|
| <b>Intermediate A</b> | -2704.355994 | 0                    | 0                     |
| <b>Intermediate B</b> | -2704.352762 | 0.003232             | 2.03                  |
| <b>Intermediate C</b> | -2704.354208 | 0.001786             | 1.12                  |
| <b>Intermediate D</b> | -2704.351035 | 0.004959             | 3.11                  |

**Intermediate A**

0 1

|    |             |             |             |
|----|-------------|-------------|-------------|
| C  | 0.60760500  | 1.98134700  | -0.36655400 |
| C  | -1.20287500 | 0.85325000  | -1.70650100 |
| C  | -1.67202600 | -0.25772800 | -2.44468400 |
| C  | -2.86849600 | -0.18626100 | -3.14105700 |
| C  | -3.63101800 | 0.98334800  | -3.09506900 |
| C  | -3.18705800 | 2.09249100  | -2.37051300 |
| C  | -1.97886800 | 2.03593400  | -1.69279100 |
| O  | 0.21242600  | 2.46915900  | 0.66523200  |
| H  | -1.05954500 | -1.16454900 | -2.46678500 |
| H  | -3.21837100 | -1.04618900 | -3.71758400 |
| H  | -4.58198300 | 1.03223400  | -3.63322300 |
| H  | -3.78922500 | 3.00411100  | -2.33769800 |
| H  | -1.63981000 | 2.89880600  | -1.11266600 |
| Rh | 0.98237900  | -0.78683500 | -0.45170400 |
| Cl | 1.97557000  | -1.21517600 | -2.54938700 |
| C  | 1.40537900  | -2.91010300 | 0.44995600  |
| H  | 1.50669800  | -3.63817800 | -0.36074000 |
| C  | 2.44592100  | -2.13389300 | 0.90086500  |
| C  | 2.05790800  | -1.31759900 | 2.12441900  |
| H  | 2.87035600  | -0.65531400 | 2.45458400  |

|   |             |             |             |
|---|-------------|-------------|-------------|
| C | 0.84277200  | -0.53396300 | 1.67810700  |
| H | 0.70780700  | 0.50481800  | 1.99894300  |
| C | -0.22607200 | -1.34889200 | 1.24769800  |
| C | 0.15184100  | -2.82568800 | 1.29250800  |
| H | -0.64182700 | -3.47376400 | 0.89693100  |
| C | 0.49278400  | -3.18513600 | 2.75495600  |
| H | -0.41225500 | -3.05042400 | 3.37118900  |
| H | 0.75791600  | -4.25336400 | 2.80680100  |
| C | 3.82560600  | -2.18197700 | 0.38935000  |
| C | 4.33167200  | -3.35078600 | -0.19731100 |
| H | 3.70630100  | -4.24752600 | -0.24055300 |
| C | 5.62620000  | -3.38776300 | -0.70585500 |
| H | 6.00601400  | -4.30995300 | -1.15474000 |
| C | 6.43876200  | -2.25686000 | -0.63842700 |
| C | 5.94913800  | -1.08939100 | -0.05416400 |
| H | 6.57730500  | -0.19570700 | -0.00242800 |
| C | 4.65684300  | -1.05415000 | 0.45941100  |
| H | 4.27576000  | -0.12446200 | 0.89349000  |
| C | -1.63074000 | -0.90458800 | 1.13915100  |
| C | -2.05177600 | 0.31505200  | 1.68273300  |
| H | -1.35418500 | 0.93014900  | 2.25745400  |
| C | -3.34529700 | 0.78060300  | 1.46670300  |
| C | -4.25942900 | 0.03846100  | 0.72448500  |
| C | -3.85242700 | -1.18483200 | 0.19774500  |
| C | -2.55840900 | -1.65293300 | 0.40385500  |
| H | -2.25285200 | -2.59442800 | -0.06260100 |
| H | 7.45585600  | -2.28600300 | -1.03934500 |
| H | -5.27069200 | 0.41327000  | 0.55136900  |
| C | 1.64506600  | -2.29621600 | 3.24648100  |

|   |             |             |             |
|---|-------------|-------------|-------------|
| H | 1.35303800  | -1.71296100 | 4.13482500  |
| H | 2.52339100  | -2.89734000 | 3.53453400  |
| C | 0.02936300  | 0.76163200  | -0.97168200 |
| O | 1.65030400  | 2.44403000  | -1.08002600 |
| C | 2.47635500  | 3.41033900  | -0.52288900 |
| C | 2.65957400  | 4.59770800  | -1.21929800 |
| C | 3.14677100  | 3.15075300  | 0.66889300  |
| C | 3.54043300  | 5.54944200  | -0.70774400 |
| H | 2.11690600  | 4.75857300  | -2.15423400 |
| C | 4.01955400  | 4.11116800  | 1.17193900  |
| H | 2.98050000  | 2.20139800  | 1.18750600  |
| C | 4.21827700  | 5.30998800  | 0.48625500  |
| H | 3.69605700  | 6.48639300  | -1.24951700 |
| H | 4.55196400  | 3.91879400  | 2.10744500  |
| H | 4.90697300  | 6.05984200  | 0.88462100  |
| C | -3.70982300 | 2.14216600  | 1.98115000  |
| C | -4.82108000 | -2.01931700 | -0.58807700 |
| F | -3.26371400 | 2.33636700  | 3.22234600  |
| F | -3.17026000 | 3.10278700  | 1.22260700  |
| F | -5.02602600 | 2.34214100  | 1.99010100  |
| F | -5.76058400 | -1.27429900 | -1.16922200 |
| F | -5.44781300 | -2.90508400 | 0.19110300  |
| F | -4.20941000 | -2.71433600 | -1.54884800 |

**Intermediate B**

0 1

|   |            |            |             |
|---|------------|------------|-------------|
| C | 0.91860600 | 2.78124300 | -0.22905400 |
| C | 2.07707500 | 3.01912800 | 0.54624900  |
| C | 2.35396400 | 4.28317100 | 1.04020600  |



|    |             |             |             |
|----|-------------|-------------|-------------|
| C  | 1.48102600  | 5.34105300  | 0.77286100  |
| C  | 0.33225400  | 5.13305200  | 0.00786100  |
| C  | 0.05207300  | 3.86887800  | -0.48940600 |
| H  | 2.75418300  | 2.18114300  | 0.73990500  |
| H  | 3.25494700  | 4.45326700  | 1.63473100  |
| H  | 1.70035600  | 6.33889900  | 1.16277400  |
| H  | -0.34549100 | 5.96422900  | -0.20171500 |
| H  | -0.85053900 | 3.72151600  | -1.09061800 |
| Rh | 1.69489500  | -0.09035800 | -0.48753000 |
| Cl | 2.96221700  | 0.22413700  | -2.45920500 |
| C  | 2.48414300  | -2.26617300 | -0.07562600 |
| H  | 2.73441400  | -2.75645200 | -1.02080900 |
| C  | 3.35246900  | -1.44583000 | 0.60389500  |
| C  | 2.78873500  | -1.01738700 | 1.94924400  |
| H  | 3.44926400  | -0.31352800 | 2.47353000  |
| C  | 1.45465300  | -0.38421300 | 1.61193800  |
| H  | 1.12160100  | 0.49917600  | 2.16870900  |
| C  | 0.56170100  | -1.26211000 | 0.95956400  |
| C  | 1.22452400  | -2.60823700 | 0.68443100  |
| H  | 0.58509000  | -3.28126200 | 0.09900000  |
| C  | 1.59962800  | -3.23359700 | 2.04547400  |
| H  | 0.67357500  | -3.41972400 | 2.61607100  |
| H  | 2.06949700  | -4.21478700 | 1.87037400  |
| C  | 4.73195400  | -1.13499800 | 0.19404300  |
| C  | 5.42661200  | -1.98165200 | -0.68208800 |
| H  | 4.95323600  | -2.90329500 | -1.03275900 |
| C  | 6.71659000  | -1.67163200 | -1.09896600 |
| H  | 7.24294900  | -2.34673800 | -1.77962000 |
| C  | 7.33897000  | -0.50806300 | -0.64825700 |

|   |             |             |             |
|---|-------------|-------------|-------------|
| C | 6.66343600  | 0.33870300  | 0.22884100  |
| H | 7.14271300  | 1.25431200  | 0.58647700  |
| C | 5.37490000  | 0.02489900  | 0.64994500  |
| H | 4.85397700  | 0.70973800  | 1.32602400  |
| C | -0.91086400 | -1.14286600 | 0.99351000  |
| C | -1.54347000 | -0.14324100 | 1.74312300  |
| H | -0.94794000 | 0.57972700  | 2.30963100  |
| C | -2.92848200 | -0.02710200 | 1.75930600  |
| C | -3.73199000 | -0.91914900 | 1.05418600  |
| C | -3.11377700 | -1.91982900 | 0.31271700  |
| C | -1.72528400 | -2.02725400 | 0.27547100  |
| H | -1.27680600 | -2.80845900 | -0.34501000 |
| H | 8.35266700  | -0.26345400 | -0.97785700 |
| H | -4.81962800 | -0.82126400 | 1.06565100  |
| C | 2.54419300  | -2.28506900 | 2.79847500  |
| H | 2.12190000  | -1.98286800 | 3.77064400  |
| H | 3.51487600  | -2.76436000 | 3.00795100  |
| C | 0.64021300  | 1.46033600  | -0.74377500 |
| C | -0.53788600 | 1.33052300  | -1.63721900 |
| O | -0.48974500 | 1.36092300  | -2.83740800 |
| O | -1.66504000 | 1.20278600  | -0.91106800 |
| C | -2.90028100 | 1.00229600  | -1.50693400 |
| C | -3.93985300 | 1.81483300  | -1.06786800 |
| C | -3.11275800 | -0.03072000 | -2.41414100 |
| C | -5.23017700 | 1.57545100  | -1.53617600 |
| H | -3.72470800 | 2.60799600  | -0.34621600 |
| C | -4.40638000 | -0.25424600 | -2.87905000 |
| H | -2.27998000 | -0.66332200 | -2.73218000 |
| C | -5.46560700 | 0.54002600  | -2.43935300 |

|   |             |             |             |
|---|-------------|-------------|-------------|
| H | -6.05617500 | 2.20190800  | -1.18833000 |
| H | -4.58838900 | -1.07339200 | -3.58061300 |
| H | -6.47892200 | 0.34994200  | -2.80309700 |
| C | -3.92838100 | -2.92962900 | -0.44209100 |
| C | -3.52716300 | 1.10922600  | 2.53412400  |
| F | -3.92724700 | -4.11152500 | 0.18270200  |
| F | -5.19772700 | -2.55628700 | -0.57947000 |
| F | -3.43732200 | -3.14530100 | -1.66548800 |
| F | -4.84675600 | 1.18510100  | 2.38830100  |
| F | -3.26957400 | 1.00376700  | 3.83962500  |
| F | -3.01454400 | 2.28182700  | 2.13963500  |

**Intermediate C**

0 1

|    |             |             |             |
|----|-------------|-------------|-------------|
| C  | 1.71751200  | 1.97790600  | -0.04501400 |
| C  | 3.27768200  | 0.59652300  | 1.36276000  |
| C  | 3.54818800  | -0.56596900 | 2.11902800  |
| C  | 4.71311600  | -0.66564100 | 2.86352300  |
| C  | 5.63545100  | 0.38304300  | 2.85293500  |
| C  | 5.39016800  | 1.54043100  | 2.10878000  |
| C  | 4.21916400  | 1.65232600  | 1.37636400  |
| O  | 2.02520200  | 2.28686900  | -1.16983800 |
| H  | 2.81020700  | -1.37418800 | 2.11354600  |
| H  | 4.91136300  | -1.56368700 | 3.45400300  |
| H  | 6.55676700  | 0.30075300  | 3.43653100  |
| H  | 6.11713800  | 2.35636300  | 2.10870900  |
| H  | 4.02862100  | 2.55827600  | 0.79108000  |
| Rh | 0.77724800  | -0.62936500 | 0.19517900  |
| Cl | -0.41355600 | -0.46838200 | 2.23313000  |

|   |             |             |             |
|---|-------------|-------------|-------------|
| C | -0.13801400 | -2.66185400 | -0.44855200 |
| H | -0.45838900 | -3.21401800 | 0.44030800  |
| C | -0.90517200 | -1.69949300 | -1.06446400 |
| C | -0.27490100 | -1.21167500 | -2.35923900 |
| H | -0.85900800 | -0.41030600 | -2.83206900 |
| C | 1.09188500  | -0.72484100 | -1.92582500 |
| H | 1.50609600  | 0.19561700  | -2.34970700 |
| C | 1.88711900  | -1.72405000 | -1.32682900 |
| C | 1.11533600  | -3.03635900 | -1.20643500 |
| H | 1.68240300  | -3.80977600 | -0.67303600 |
| C | 0.73728600  | -3.49883500 | -2.62968600 |
| H | 1.66639200  | -3.69760300 | -3.19034400 |
| H | 0.19329500  | -4.45486800 | -2.56385500 |
| C | -2.24241900 | -1.27225200 | -0.62082000 |
| C | -3.05111900 | -2.11650400 | 0.14289800  |
| H | -2.71578700 | -3.13211700 | 0.37473400  |
| C | -4.29094100 | -1.68379600 | 0.60975200  |
| C | -4.75331600 | -0.40656100 | 0.31955300  |
| C | -3.95493300 | 0.43693600  | -0.45415000 |
| C | -2.71745400 | 0.01292300  | -0.92172700 |
| H | -2.09763300 | 0.70102100  | -1.50462900 |
| C | 3.36041800  | -1.67479700 | -1.21075800 |
| C | 4.09608100  | -0.62828600 | -1.79210300 |
| H | 3.57999000  | 0.15215100  | -2.35858400 |
| C | 5.47622800  | -0.55579500 | -1.64352100 |
| C | 6.16056900  | -1.53237600 | -0.91847900 |
| C | 5.44643100  | -2.58015400 | -0.34299400 |
| C | 4.06242700  | -2.64870900 | -0.48597700 |
| H | 3.52193600  | -3.46727600 | -0.00151100 |

|   |             |             |             |
|---|-------------|-------------|-------------|
| H | -5.72781200 | -0.07167600 | 0.68251700  |
| H | 7.24697400  | -1.47629100 | -0.80588700 |
| C | -0.11127800 | -2.41561200 | -3.31189300 |
| H | 0.35805600  | -2.06465100 | -4.24512800 |
| H | -1.11032000 | -2.79638000 | -3.58166200 |
| C | 2.06483800  | 0.69509100  | 0.60227100  |
| O | 0.97155100  | 2.73526200  | 0.78249900  |
| C | 0.29688200  | 3.83488000  | 0.26775100  |
| C | 0.98517000  | 4.97699300  | -0.12447700 |
| C | -1.08964300 | 3.75671000  | 0.20470100  |
| C | 0.25692100  | 6.06755400  | -0.59515700 |
| H | 2.07604200  | 5.00330800  | -0.05756800 |
| C | -1.80685000 | 4.85446700  | -0.26632300 |
| H | -1.58717600 | 2.84049600  | 0.53855600  |
| C | -1.13495400 | 6.00852600  | -0.66746300 |
| H | 0.78423300  | 6.97319700  | -0.90760500 |
| H | -2.89774400 | 4.80053300  | -0.31650600 |
| H | -1.69927400 | 6.86919800  | -1.03665900 |
| H | 6.02557600  | 0.27068000  | -2.10374100 |
| H | 5.96843400  | -3.35134000 | 0.23098000  |
| C | -4.42985900 | 1.83460600  | -0.72349400 |
| C | -5.11446800 | -2.64420800 | 1.41670700  |
| F | -6.25776500 | -2.10740700 | 1.83314800  |
| F | -4.44990100 | -3.06440500 | 2.49474000  |
| F | -5.41803400 | -3.73377300 | 0.70542900  |
| F | -5.74426500 | 1.87794000  | -0.93452900 |
| F | -4.18066700 | 2.63762800  | 0.32063200  |
| F | -3.83175100 | 2.37697000  | -1.78163300 |

**Intermediate D**

0 1

|    |             |             |             |
|----|-------------|-------------|-------------|
| C  | 1.18323900  | 2.48740300  | 0.04120100  |
| C  | 0.00948800  | 2.85601200  | -0.65521500 |
| C  | -0.22431000 | 4.17408800  | -1.01059400 |
| C  | 0.71245500  | 5.15777000  | -0.68262200 |
| C  | 1.88041300  | 4.82022900  | 0.00318700  |
| C  | 2.11559400  | 3.50127500  | 0.36317500  |
| H  | -0.71630700 | 2.07411000  | -0.89892800 |
| H  | -1.14254200 | 4.44136700  | -1.53956100 |
| H  | 0.52824900  | 6.19896600  | -0.96160900 |
| H  | 2.60817700  | 5.59376500  | 0.26048700  |
| H  | 3.03302500  | 3.25364200  | 0.90675300  |
| Rh | 0.19284800  | -0.31495200 | 0.15267400  |
| Cl | -1.03371400 | 0.14232700  | 2.13170800  |
| C  | -0.82684300 | -2.38727200 | -0.22568900 |
| H  | -1.14610100 | -2.81108300 | 0.73102700  |
| C  | -1.56092200 | -1.46410100 | -0.93336700 |
| C  | -0.94027100 | -1.15236500 | -2.28701800 |
| H  | -1.50307600 | -0.38725800 | -2.83911900 |
| C  | 0.45850900  | -0.68028700 | -1.93995600 |
| H  | 0.91905400  | 0.14668500  | -2.49377500 |
| C  | 1.21758400  | -1.64428600 | -1.24742800 |
| C  | 0.39219000  | -2.89616100 | -0.95439800 |
| H  | 0.95279000  | -3.62183600 | -0.34956800 |
| C  | -0.02877300 | -3.49813900 | -2.31244300 |
| H  | 0.88246200  | -3.79310000 | -2.86047400 |
| H  | -0.60742100 | -4.41880600 | -2.13463900 |
| C  | -2.85971900 | -0.90987800 | -0.51517500 |

|   |             |             |             |
|---|-------------|-------------|-------------|
| C | -3.67458300 | -1.57640700 | 0.40117900  |
| H | -3.38772000 | -2.56558200 | 0.77118900  |
| C | -4.85743600 | -0.99409300 | 0.85575200  |
| C | -5.24817800 | 0.26266200  | 0.41257100  |
| C | -4.44370600 | 0.92713400  | -0.51455600 |
| C | -3.27586600 | 0.34428300  | -0.98405100 |
| H | -2.66113200 | 0.89081100  | -1.70341400 |
| C | 2.69131500  | -1.73666900 | -1.25280200 |
| C | 3.44529600  | -1.18133400 | -2.29586300 |
| H | 2.93840200  | -0.65389600 | -3.10984700 |
| C | 4.83107300  | -1.31925900 | -2.32354900 |
| C | 5.48719600  | -2.02039300 | -1.31369300 |
| C | 4.74812100  | -2.57510500 | -0.26912400 |
| C | 3.36498400  | -2.43197000 | -0.23741300 |
| H | 2.79458700  | -2.84721000 | 0.60144800  |
| H | -6.16927100 | 0.72282100  | 0.77971000  |
| H | 6.57553900  | -2.13092400 | -1.33648300 |
| C | -0.84679100 | -2.46271600 | -3.09851000 |
| H | -0.38407800 | -2.24046900 | -4.07383300 |
| H | -1.86644900 | -2.82745900 | -3.30594200 |
| C | 1.40185600  | 1.11256400  | 0.43078200  |
| C | 2.61047000  | 0.84178000  | 1.24601900  |
| O | 2.60465800  | 0.78502100  | 2.44749000  |
| O | 3.69267300  | 0.70953300  | 0.46031600  |
| C | 4.97065000  | 0.53033400  | 0.96552000  |
| C | 5.98132100  | 1.19631200  | 0.27855100  |
| C | 5.25558500  | -0.31309100 | 2.03633700  |
| C | 7.30621600  | 1.00918600  | 0.66200700  |
| H | 5.71049700  | 1.84107200  | -0.56232200 |

|   |             |             |             |
|---|-------------|-------------|-------------|
| C | 6.58642200  | -0.48765400 | 2.41128100  |
| H | 4.45278000  | -0.83622700 | 2.55770000  |
| C | 7.61218900  | 0.16513000  | 1.72909500  |
| H | 8.10401000  | 1.52617300  | 0.12154800  |
| H | 6.82162900  | -1.15011400 | 3.24917400  |
| H | 8.65246500  | 0.01707200  | 2.03138100  |
| H | 5.25644500  | -3.11719800 | 0.53373700  |
| H | 5.40173500  | -0.88496000 | -3.14971900 |
| C | -5.69273600 | -1.76971800 | 1.83171200  |
| C | -4.88370100 | 2.27644100  | -1.00128300 |
| F | -5.98300200 | 2.18314200  | -1.75445600 |
| F | -5.18215200 | 3.08674100  | 0.01461800  |
| F | -3.95018000 | 2.88032700  | -1.73597600 |
| F | -6.11295500 | -2.91932400 | 1.29565000  |
| F | -6.76934200 | -1.09647900 | 2.22704700  |
| F | -4.99363300 | -2.08926400 | 2.92217500  |



## 7. Crystal structure of compound 3a

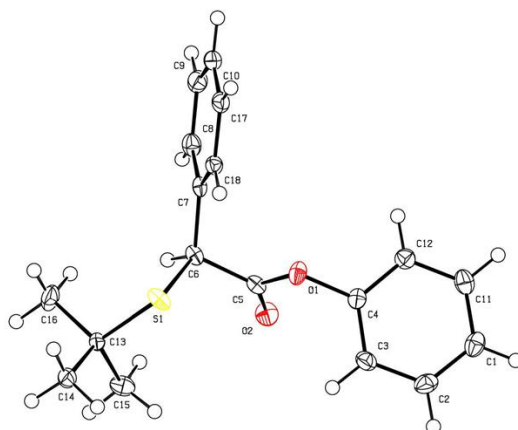

**Figure S2.** ORTEP representation of compound **3a**

|                        |                                            |                                  |               |
|------------------------|--------------------------------------------|----------------------------------|---------------|
| Bond precision:        | C-C = 0.0029 Å                             | Wavelength=0.71073               |               |
| Cell:                  | a=9.0924 (4)                               | b=8.7294 (4)                     | c=10.8209 (4) |
|                        | alpha=90                                   | beta=110.726 (1)                 | gamma=90      |
| Temperature:           | 100 K                                      |                                  |               |
|                        | Calculated                                 | Reported                         |               |
| Volume                 | 803.29 (6)                                 | 803.28 (6)                       |               |
| Space group            | P 21                                       | P 1 21 1                         |               |
| Hall group             | P 2yb                                      | P 2yb                            |               |
| Moiety formula         | C18 H20 O2 S                               | C18 H20 O2 S                     |               |
| Sum formula            | C18 H20 O2 S                               | C18 H20 O2 S                     |               |
| Mr                     | 300.40                                     | 300.40                           |               |
| Dx, g cm <sup>-3</sup> | 1.242                                      | 1.242                            |               |
| Z                      | 2                                          | 2                                |               |
| Mu (mm <sup>-1</sup> ) | 0.203                                      | 0.203                            |               |
| F000                   | 320.0                                      | 320.0                            |               |
| F000'                  | 320.38                                     |                                  |               |
| h, k, lmax             | 13, 12, 15                                 | 13, 12, 15                       |               |
| Nref                   | 4956 [ 2627]                               | 4947                             |               |
| Tmin, Tmax             | 0.932, 0.945                               | 0.689, 0.746                     |               |
| Tmin'                  | 0.930                                      |                                  |               |
| Correction method=     | # Reported T Limits: Tmin=0.689 Tmax=0.746 |                                  |               |
| AbsCorr =              | MULTI-SCAN                                 |                                  |               |
| Data completeness=     | 1.88/1.00                                  | Theta(max)= 30.597               |               |
| R(reflections)=        | 0.0326 ( 4686)                             | wR2(reflections)= 0.0842 ( 4947) |               |
| S =                    | 1.053                                      | Npar= 193                        |               |

**Figure S3.** Crystal structure parameters

## 8. NMR spectra

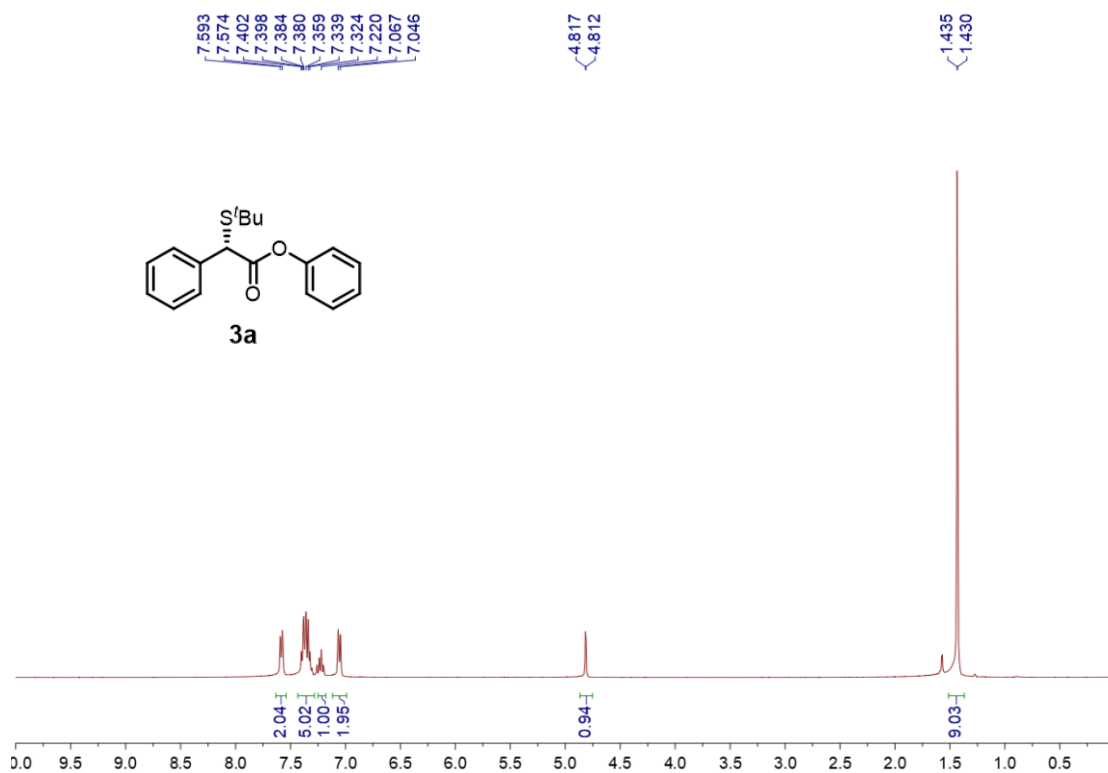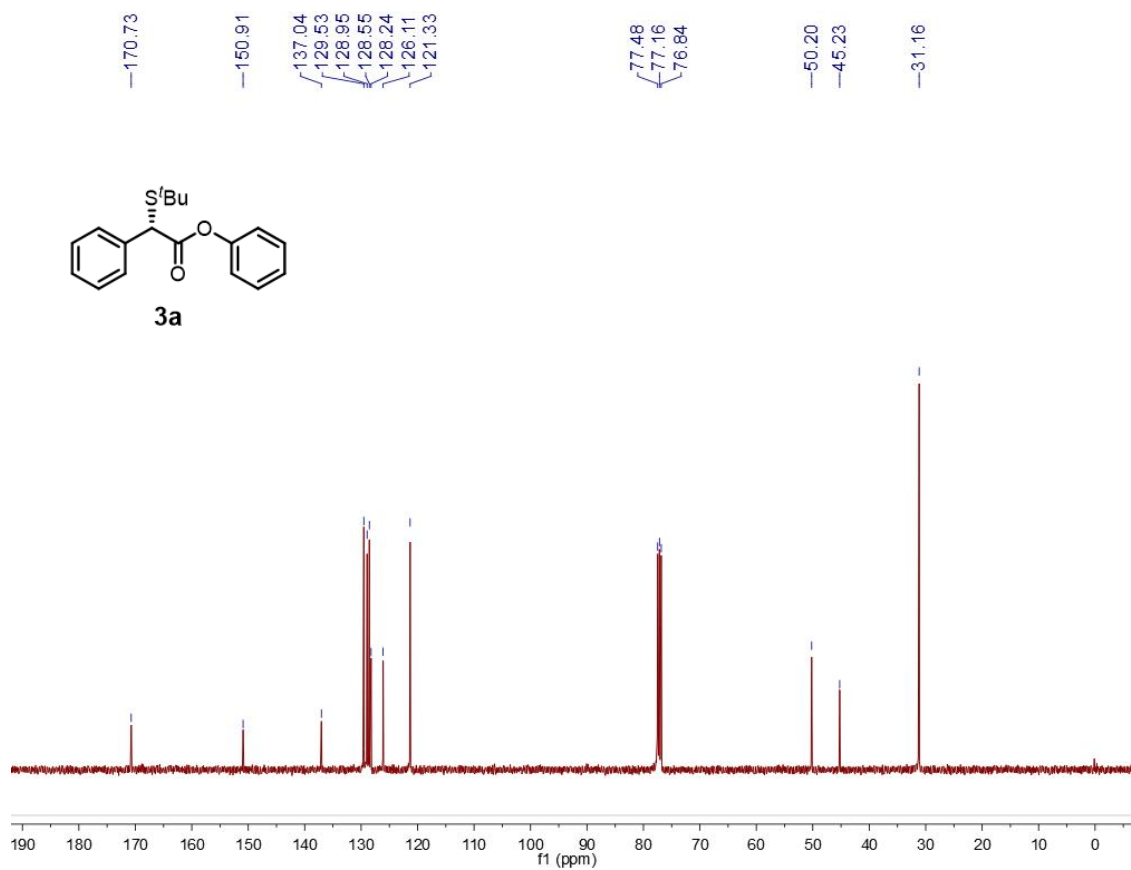

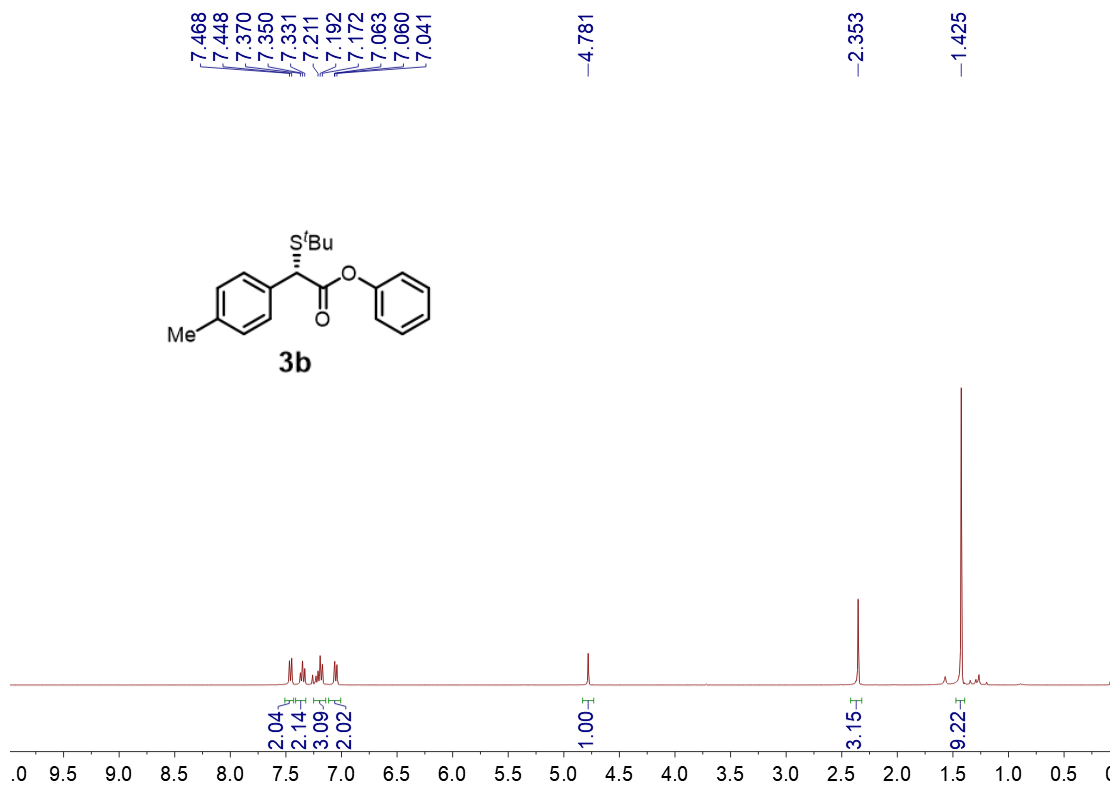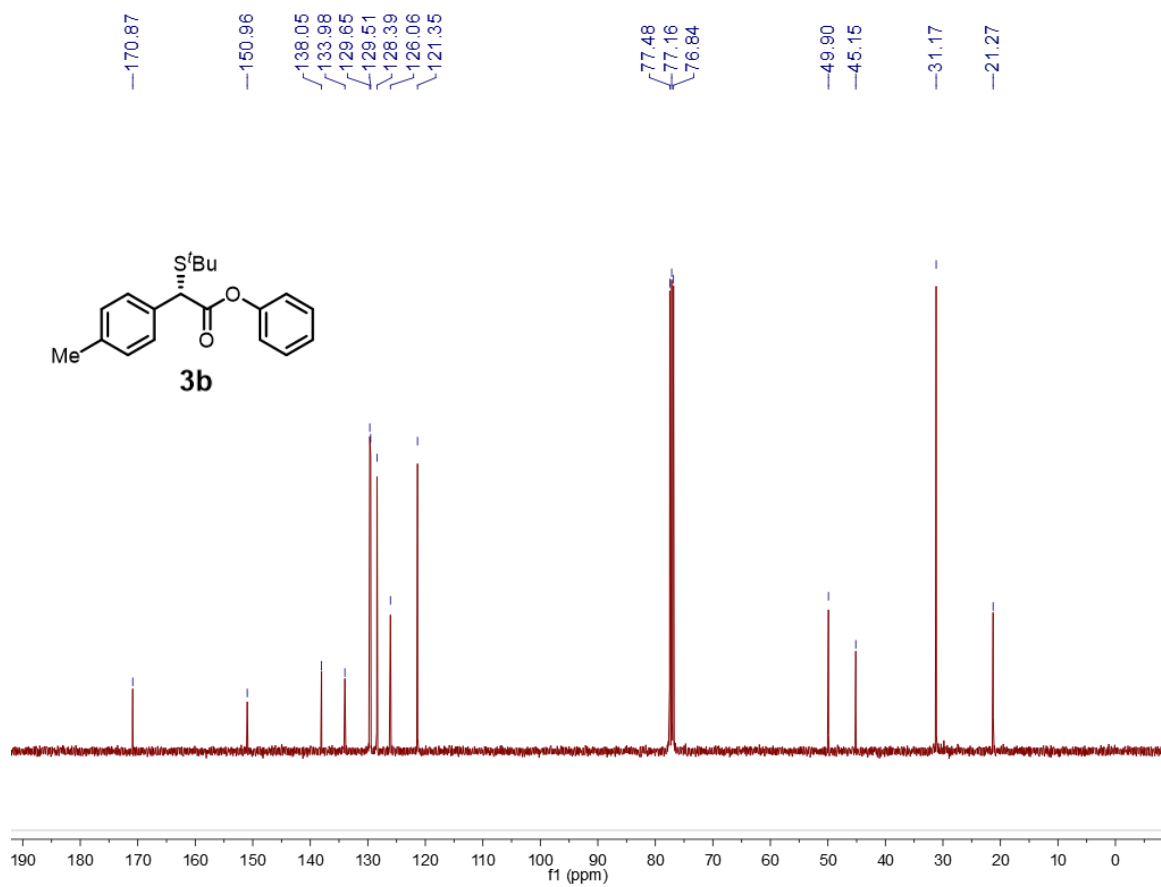

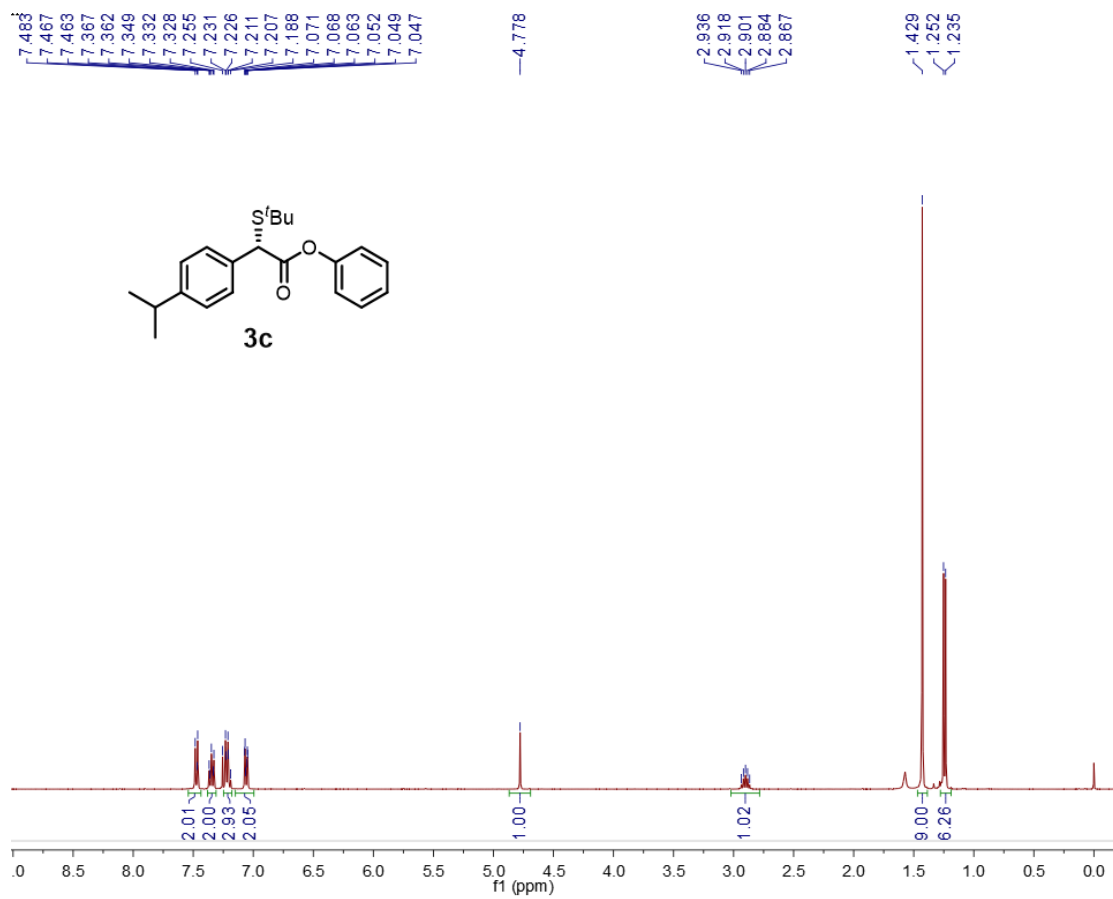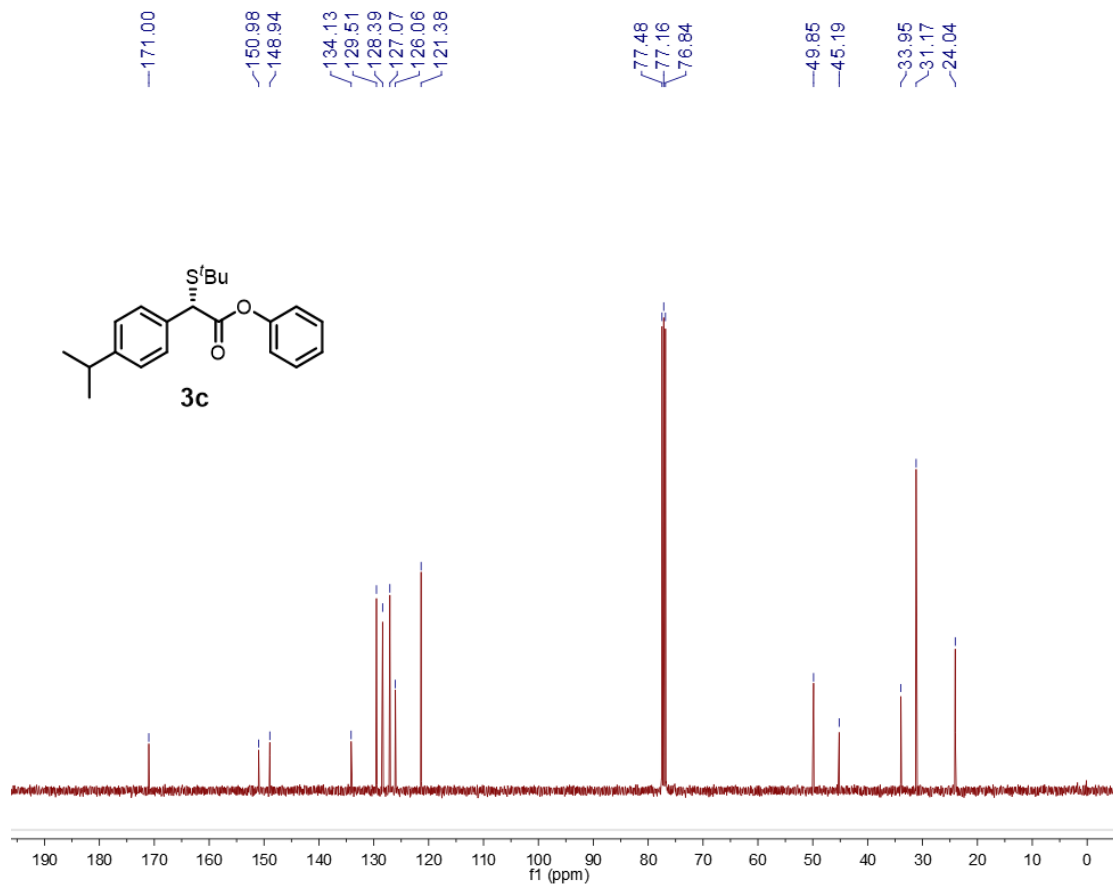

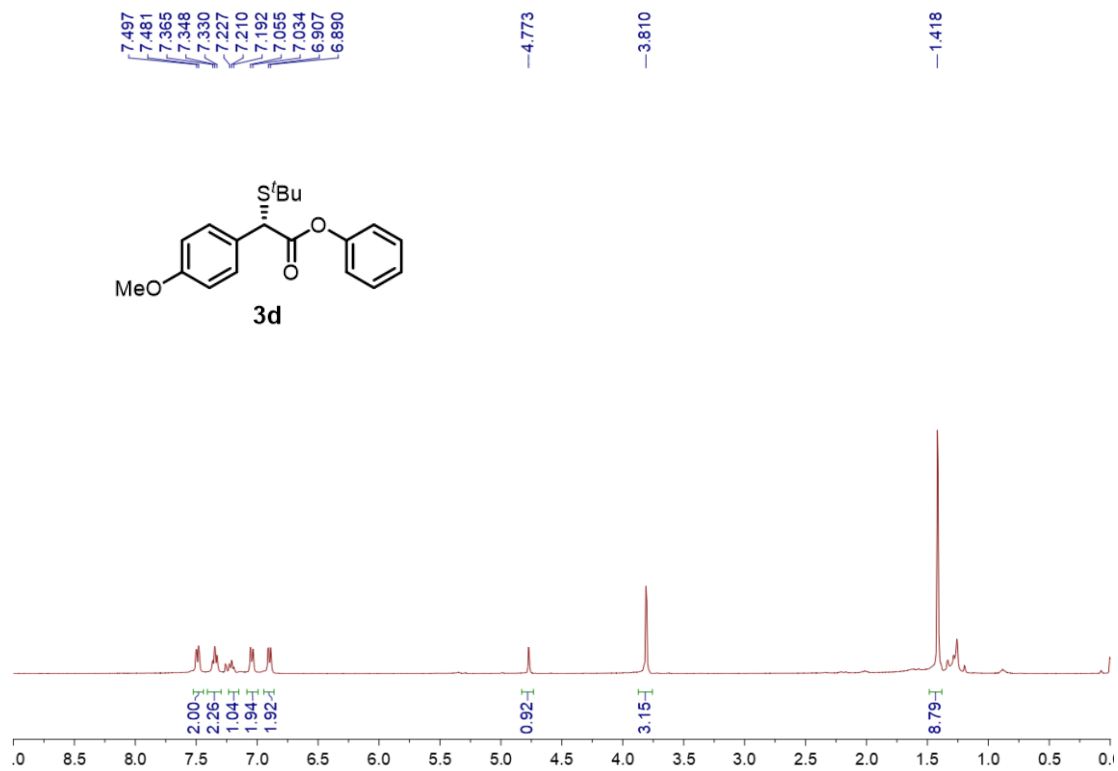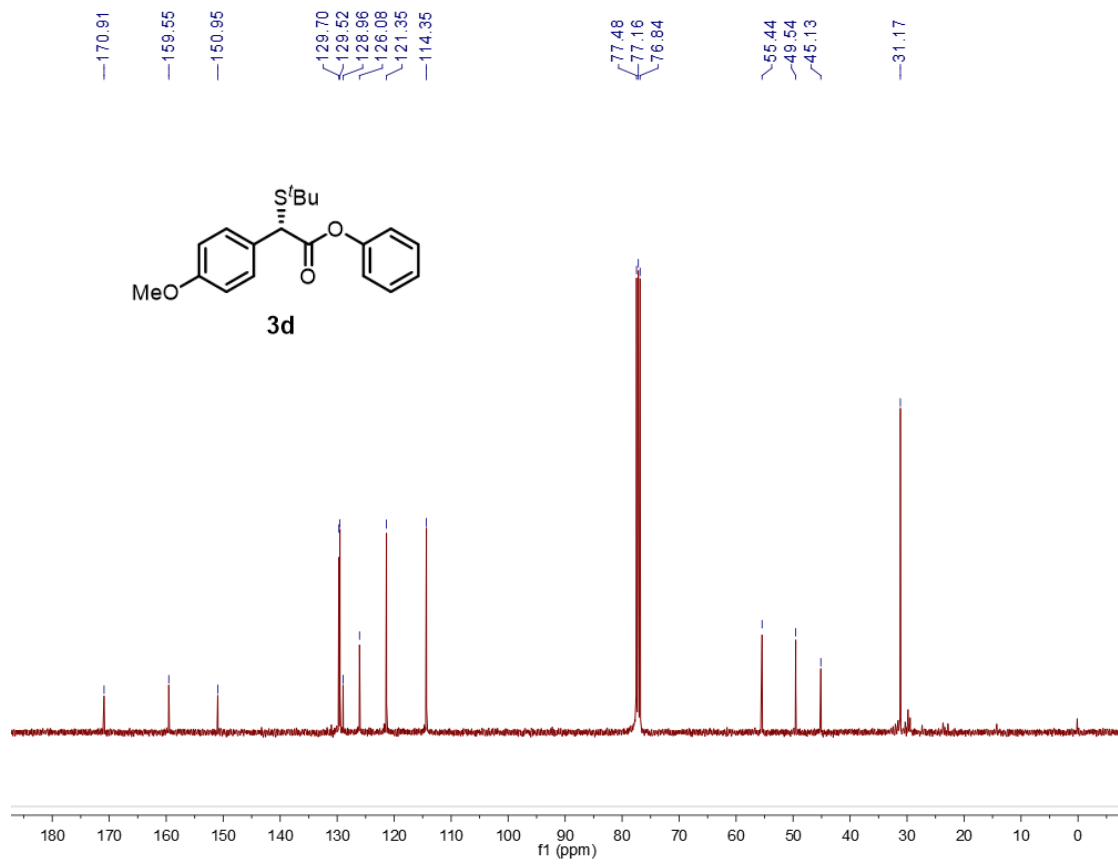

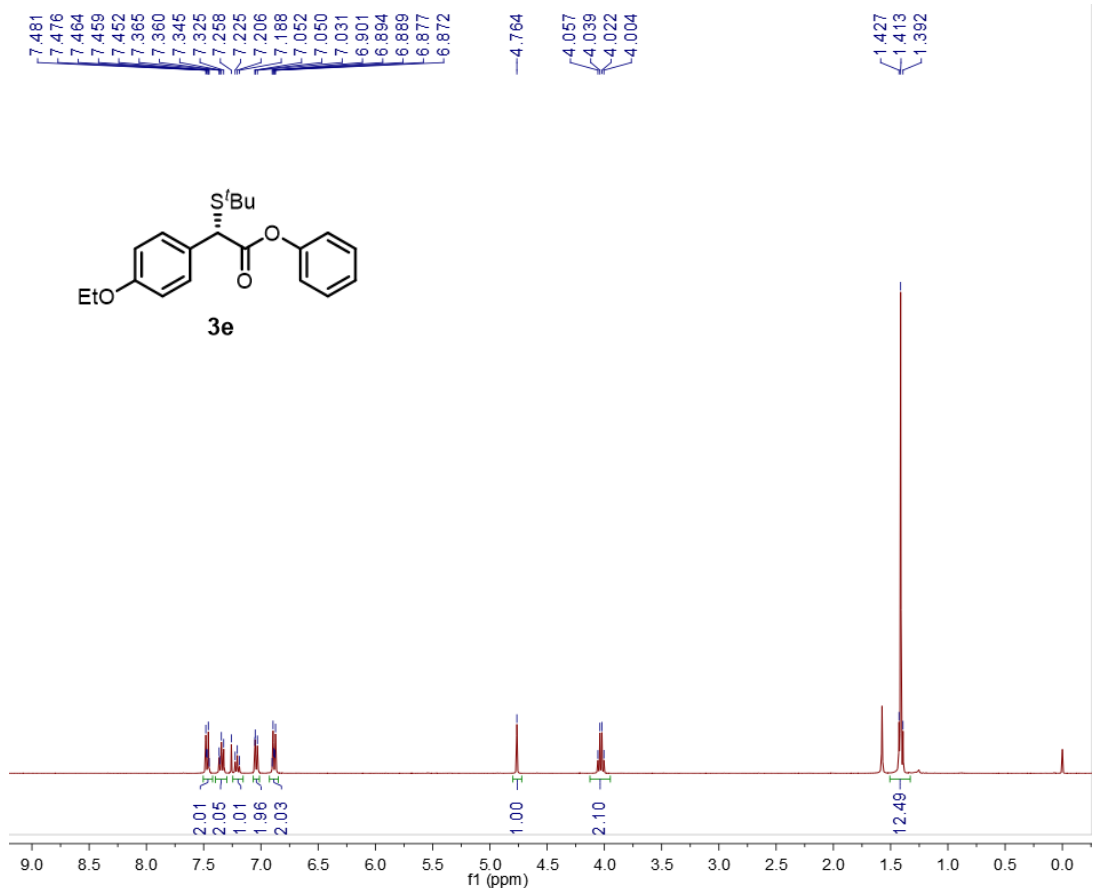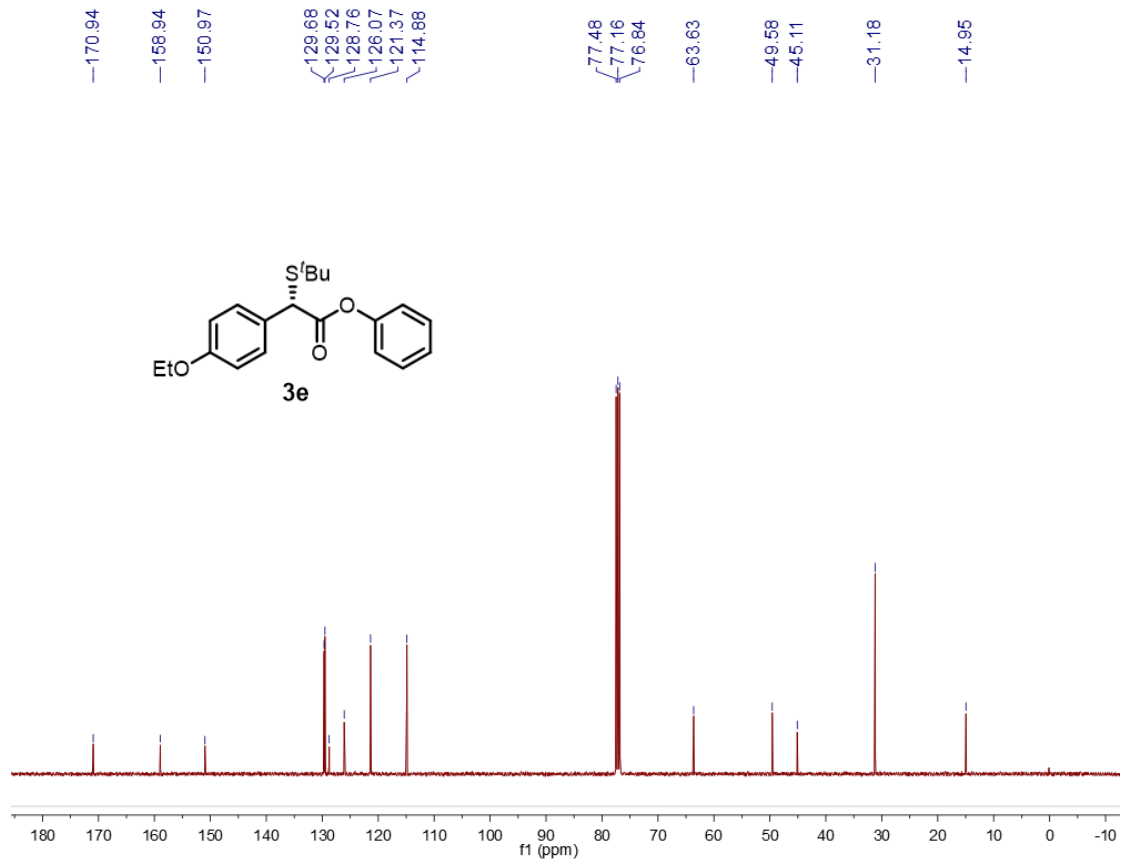

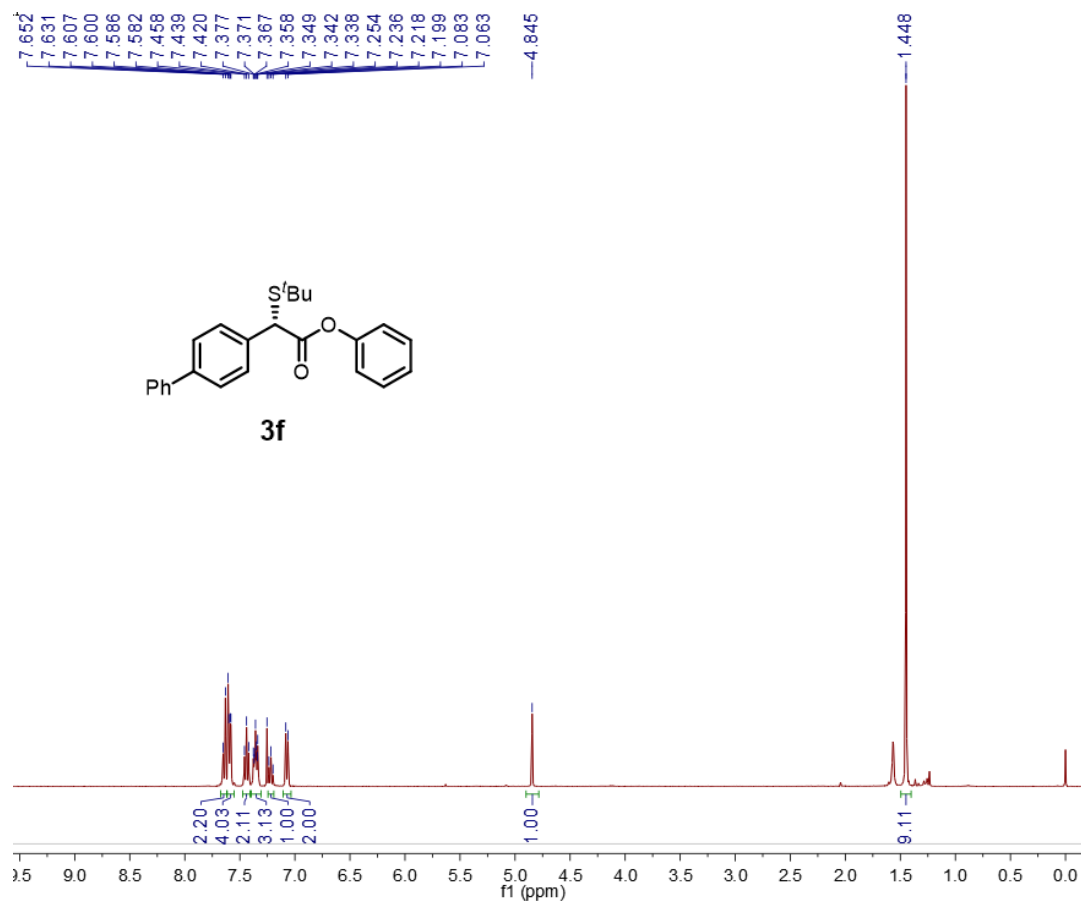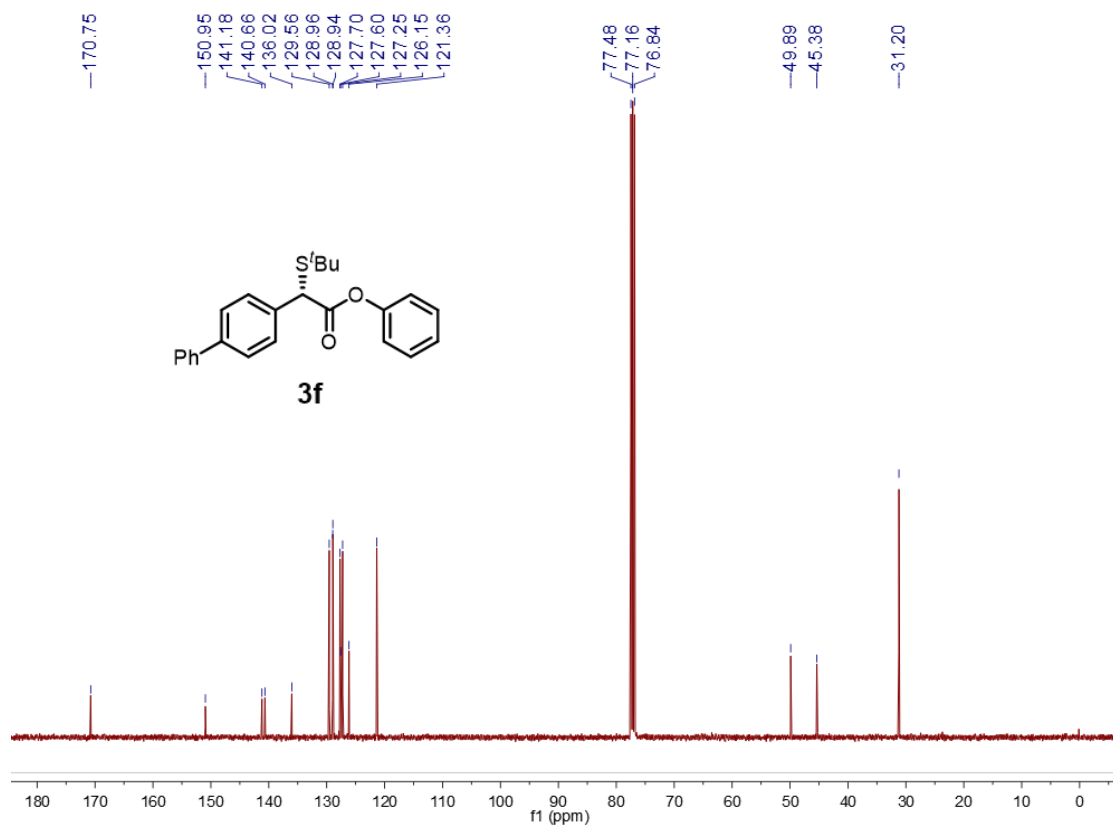

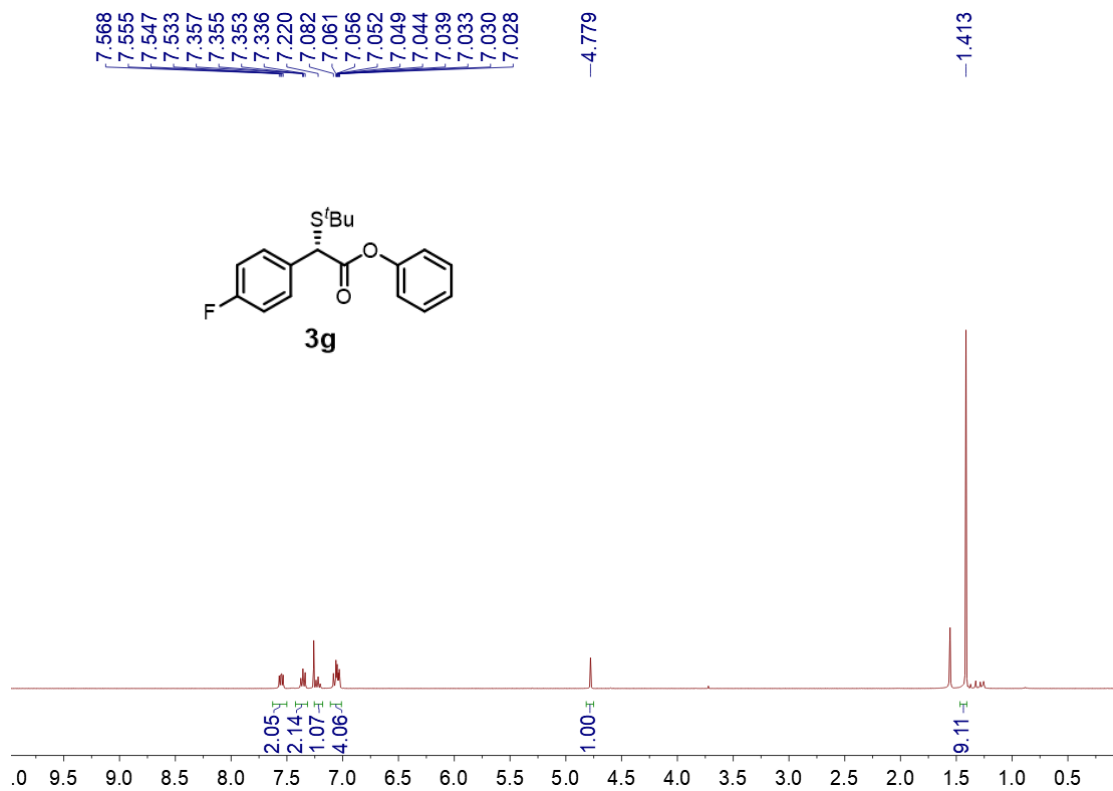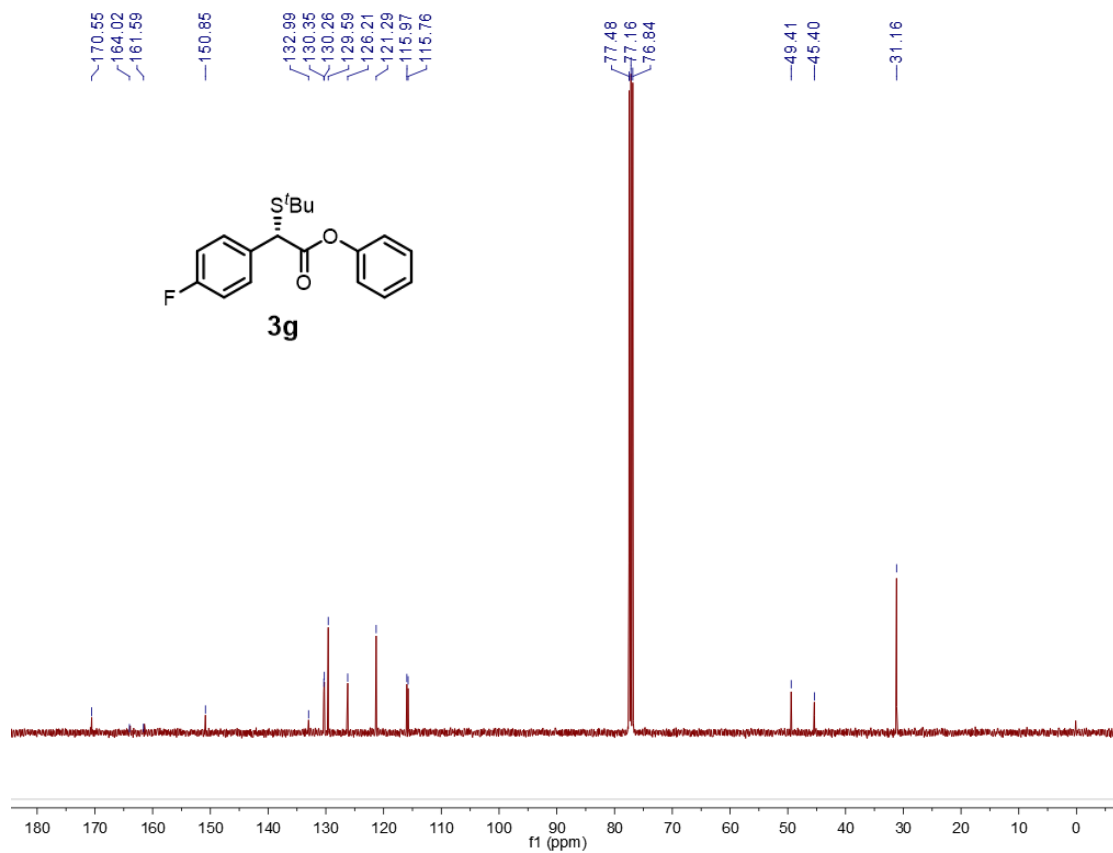



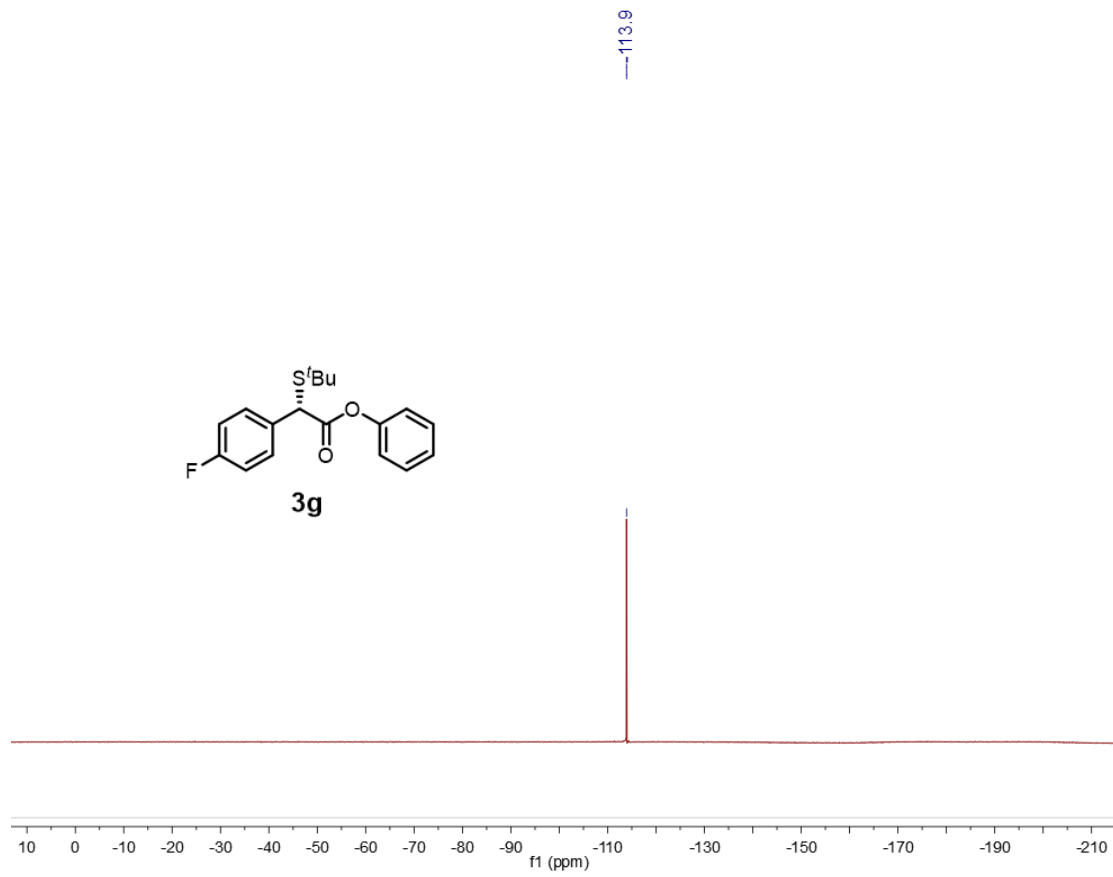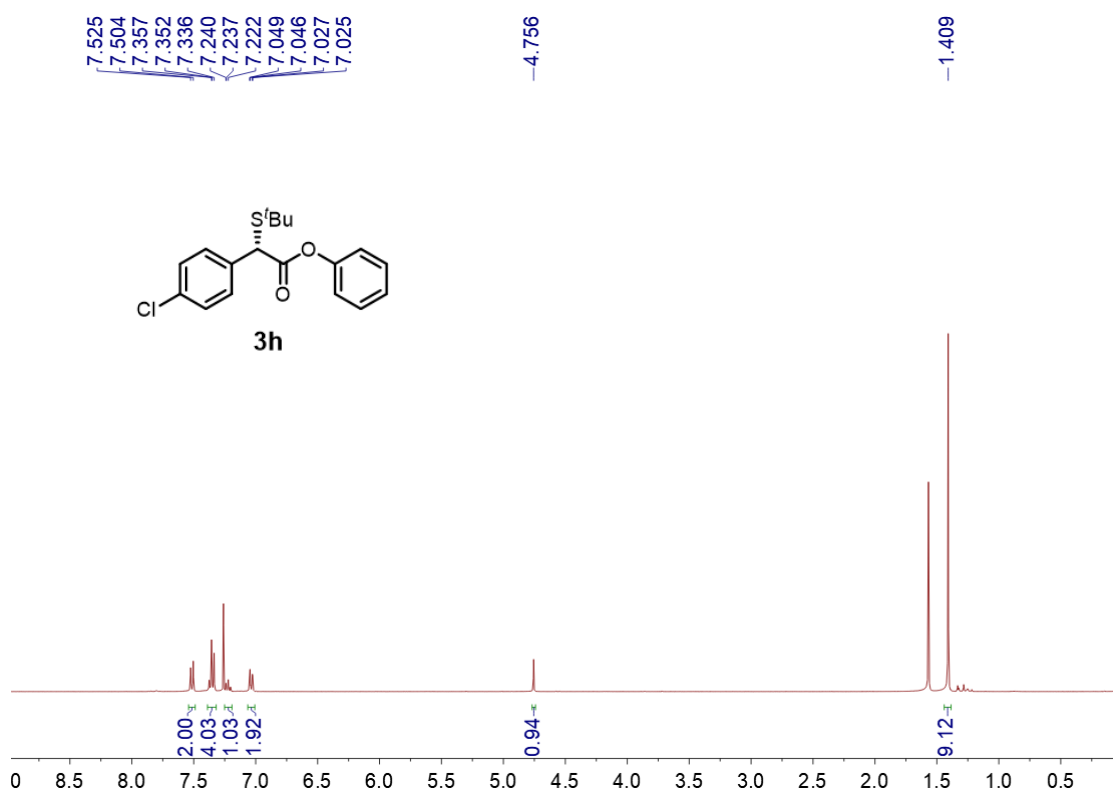

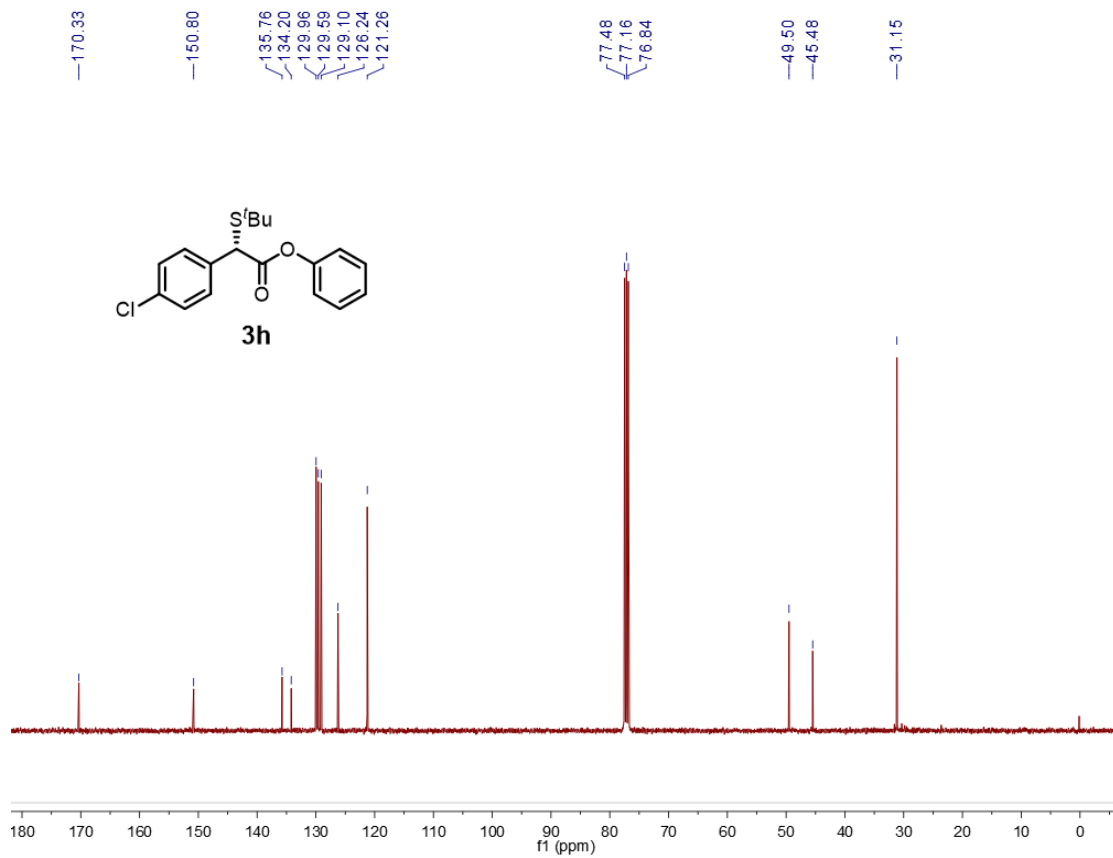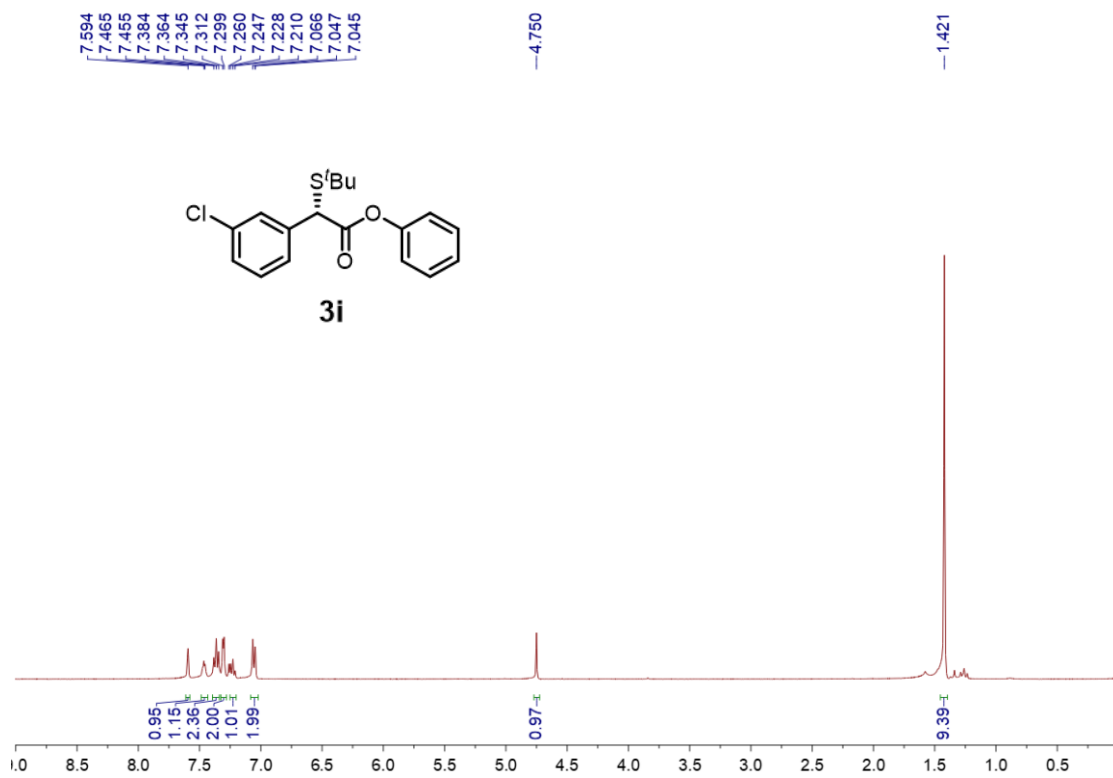

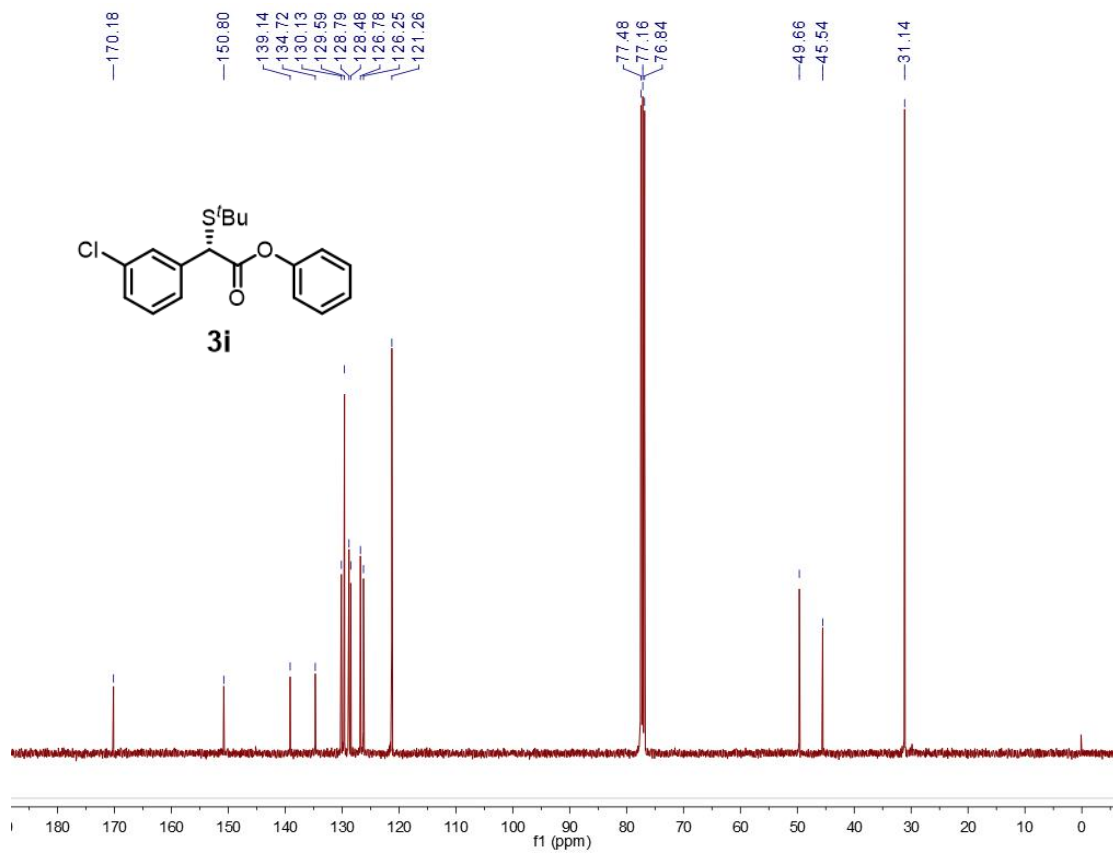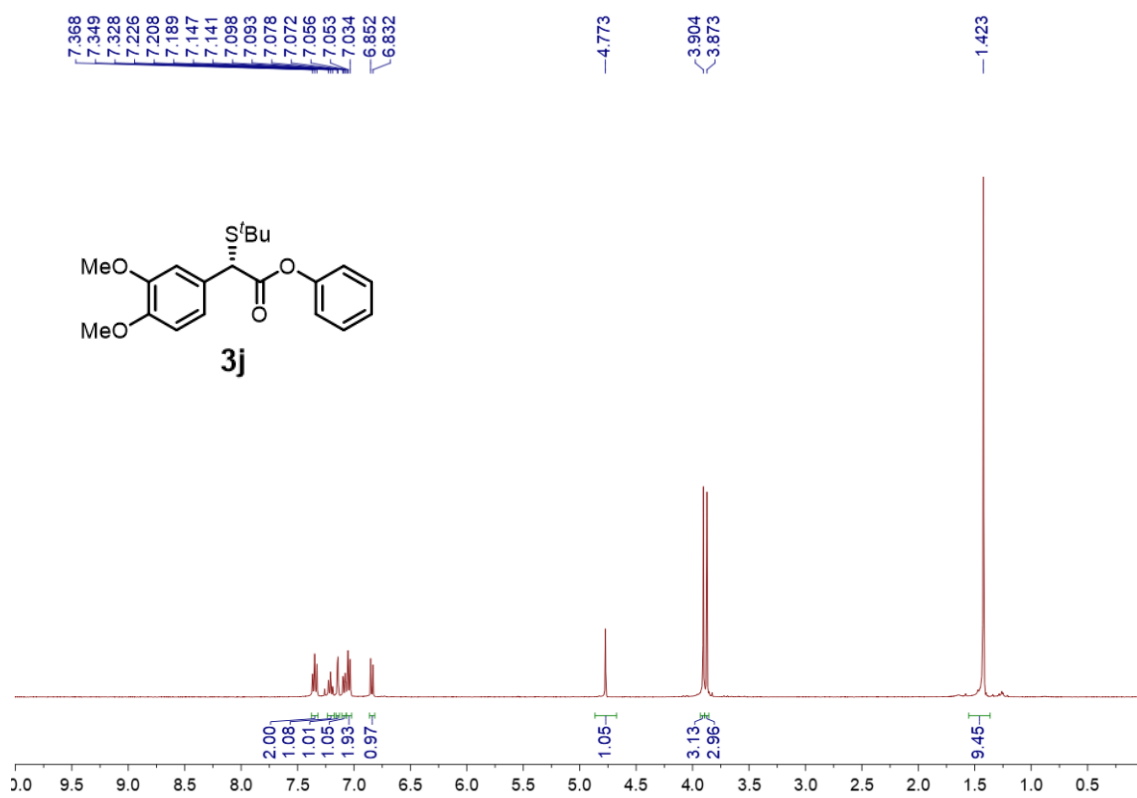

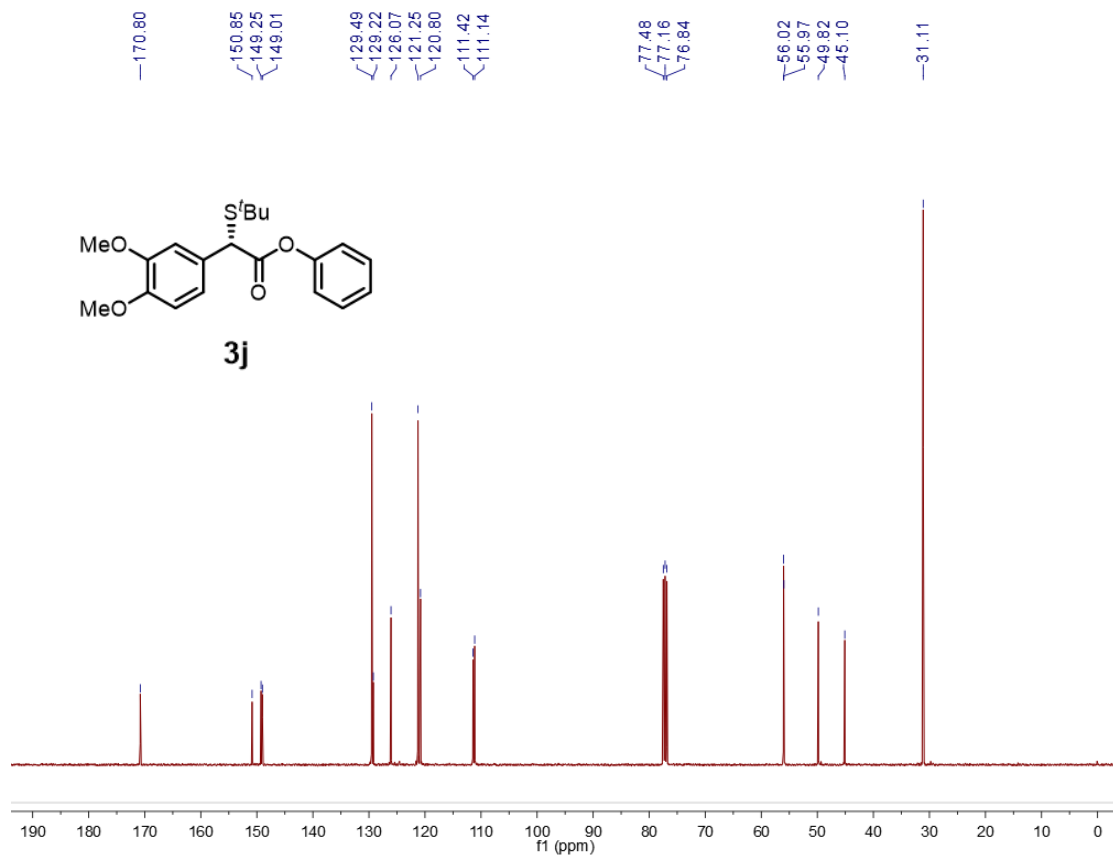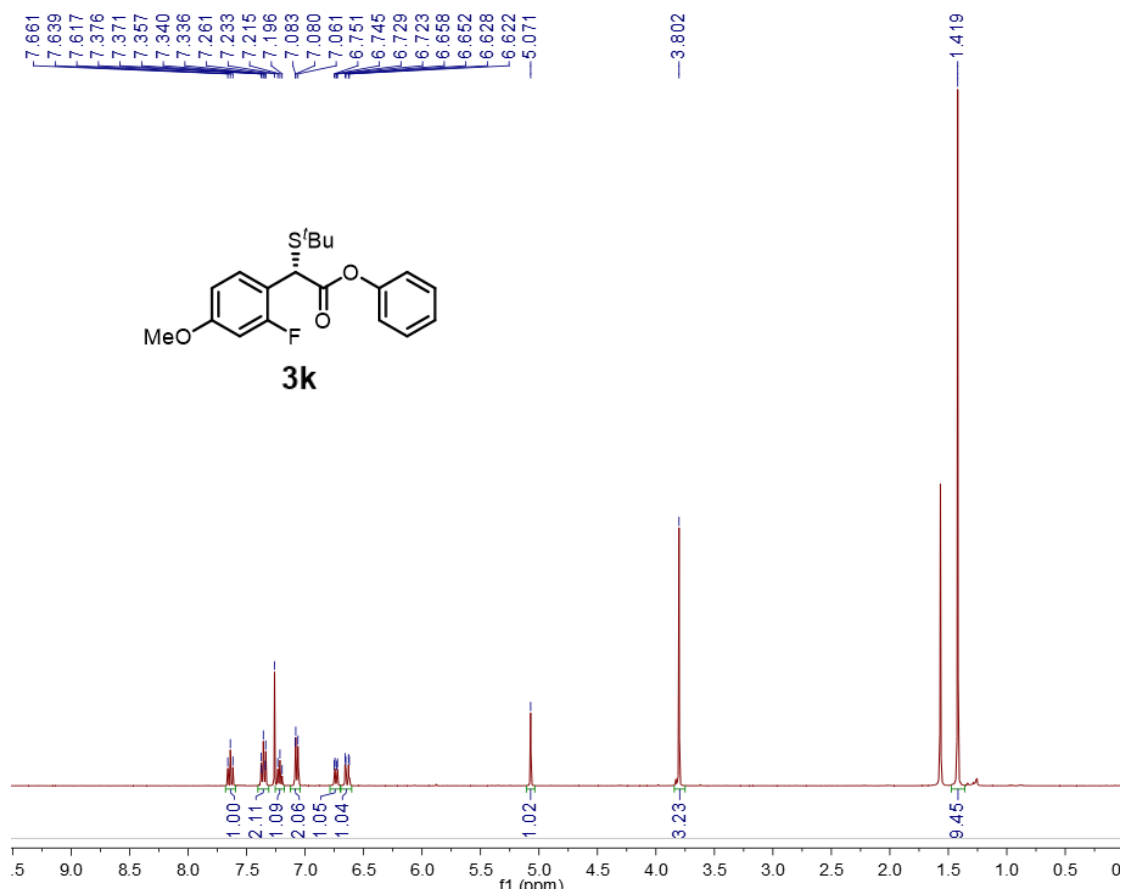

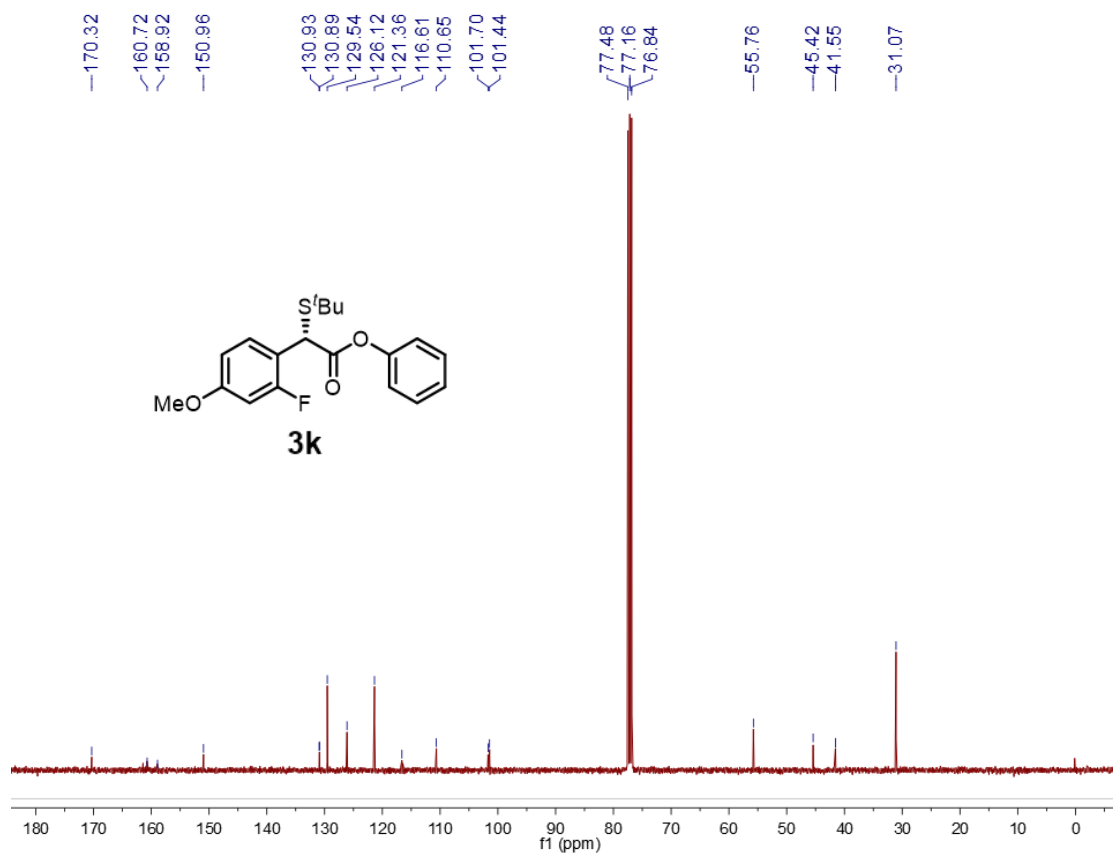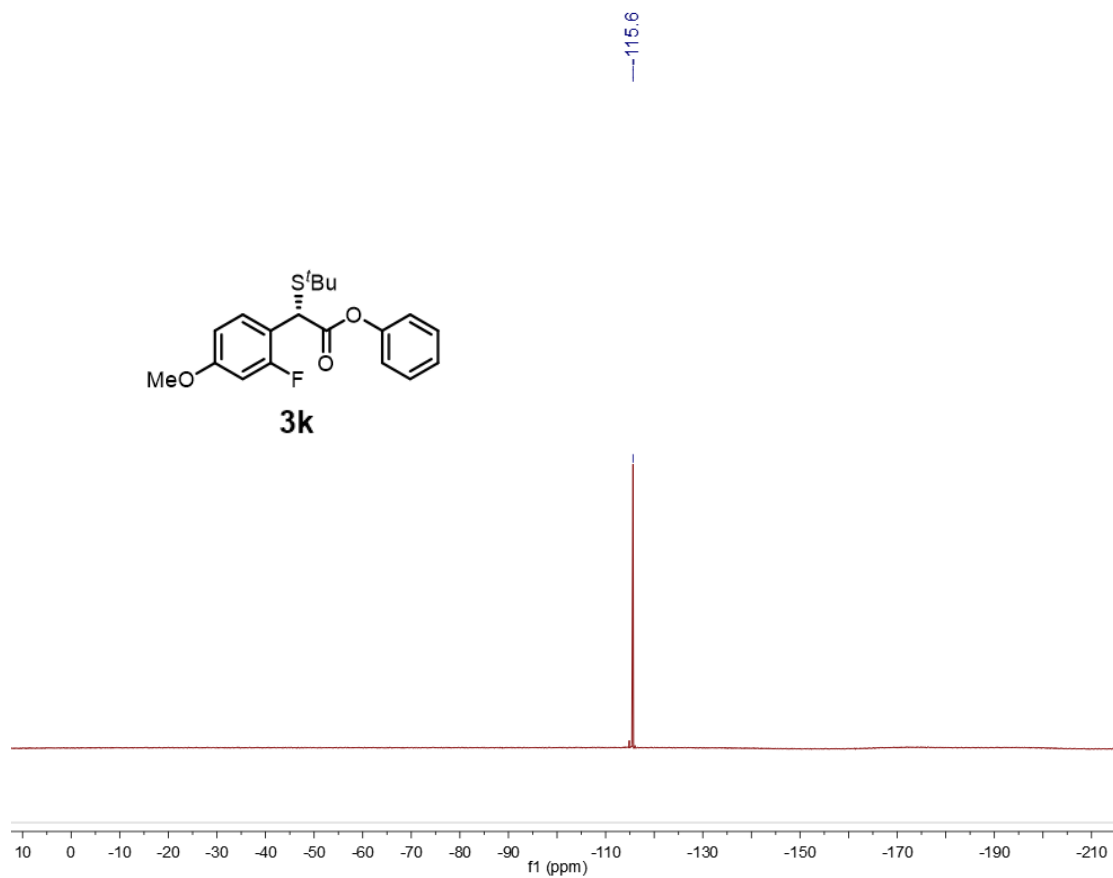

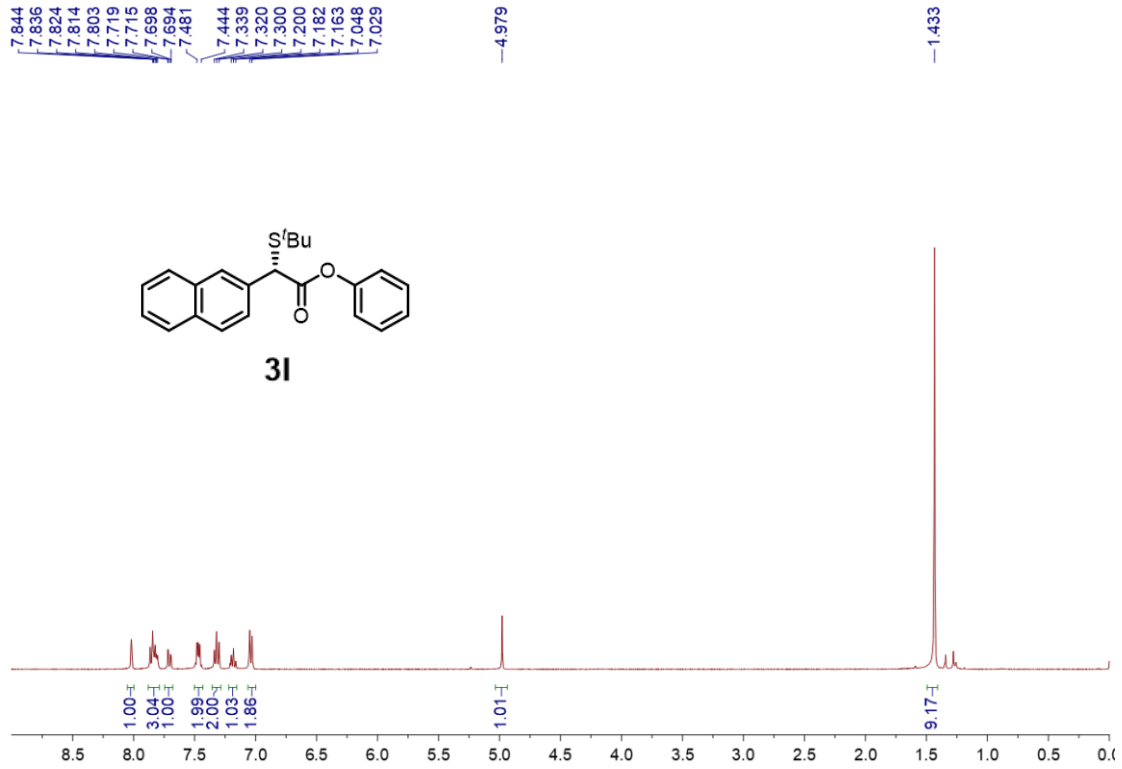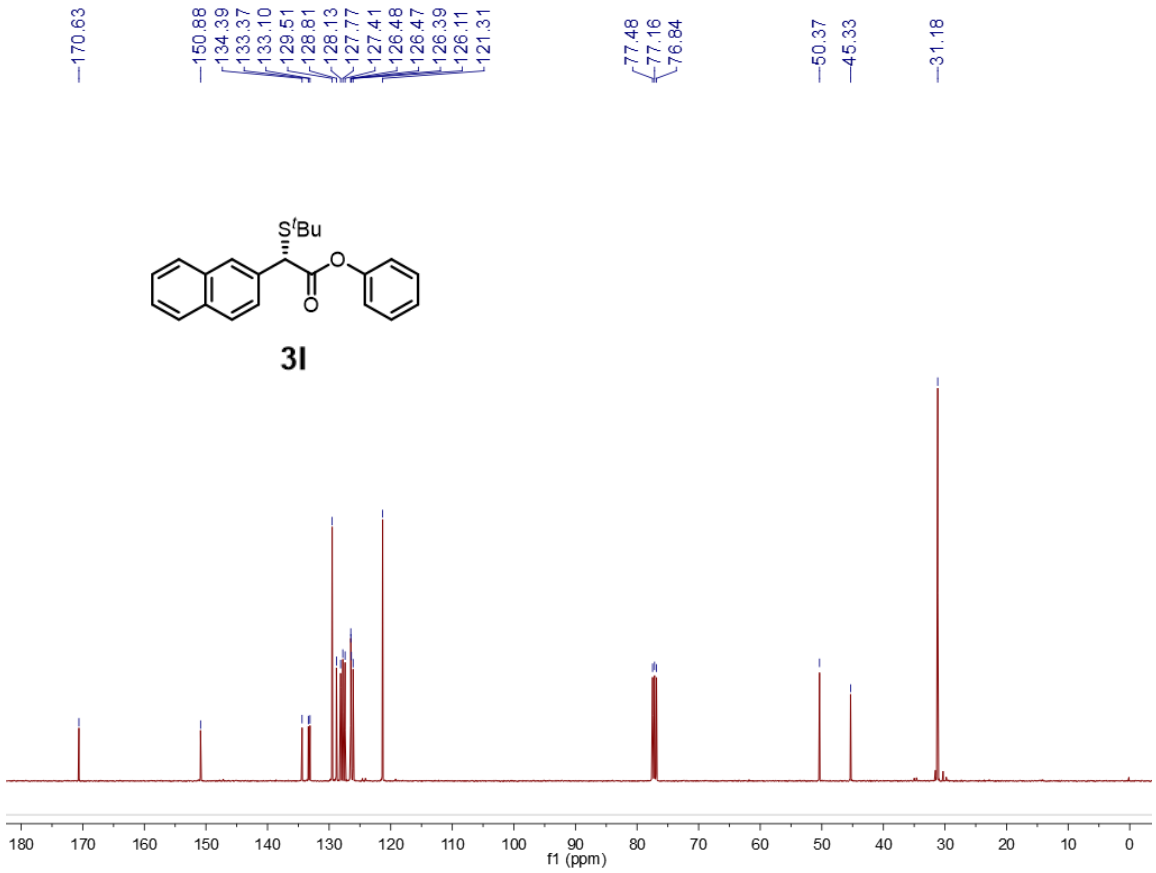

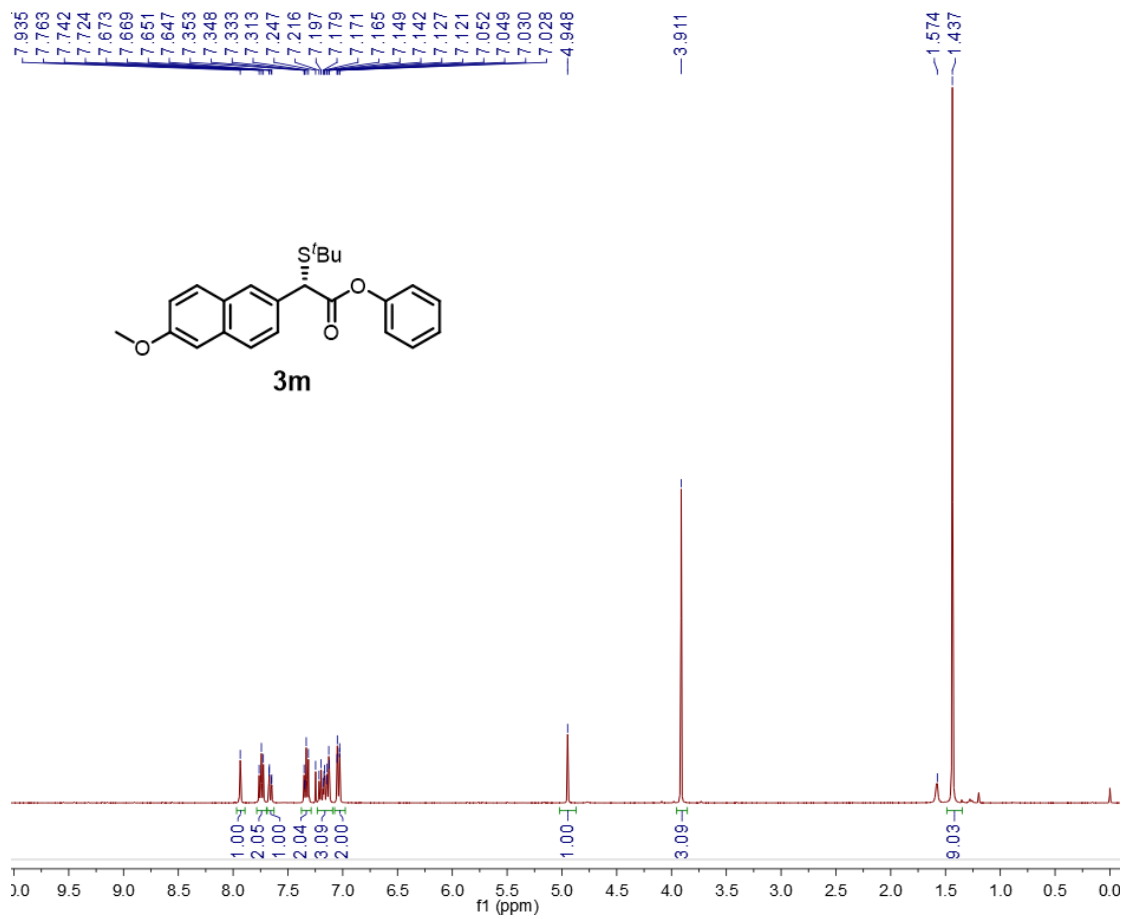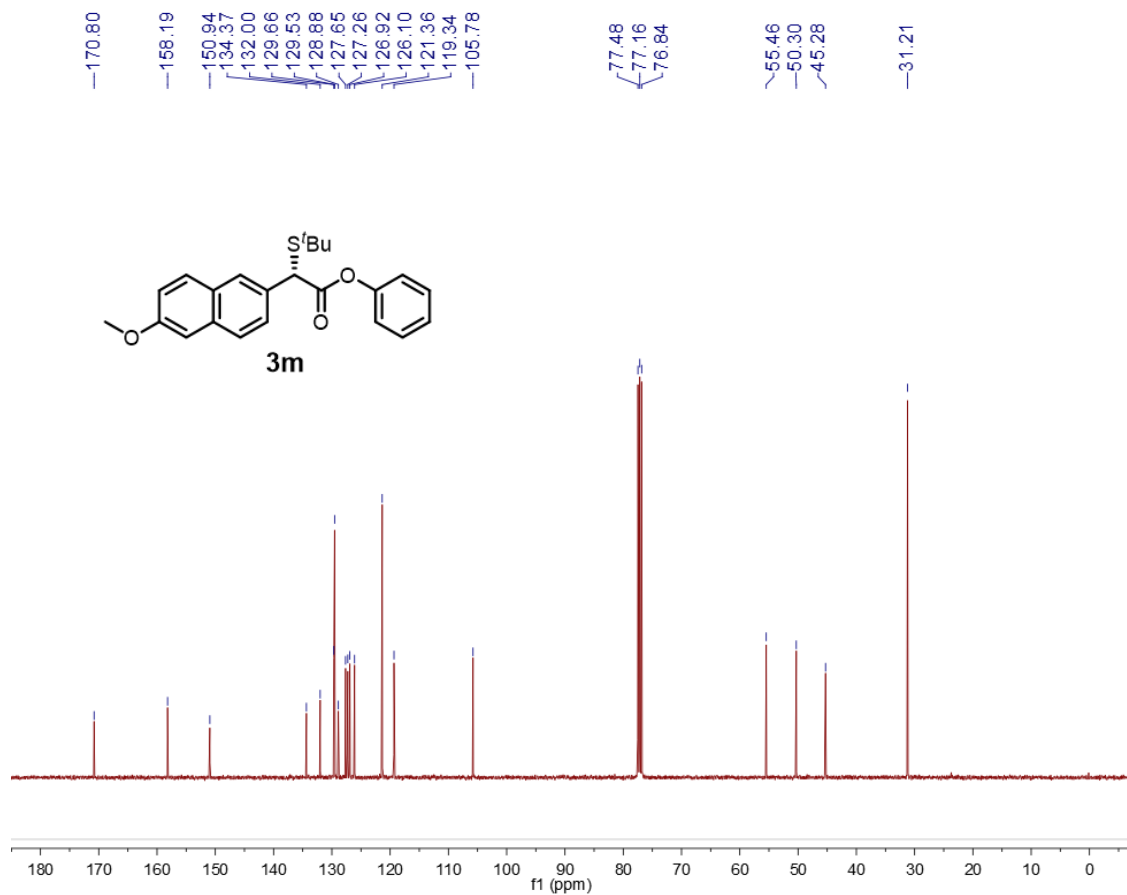

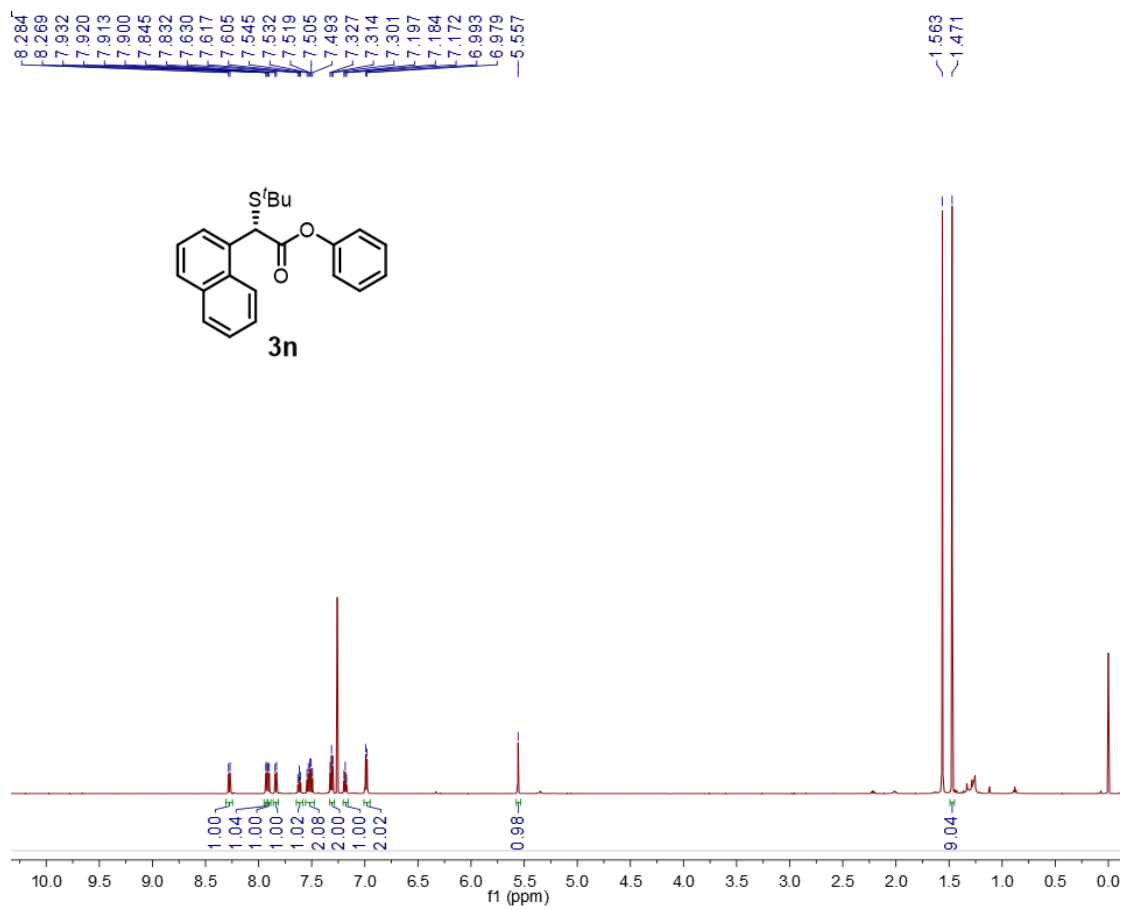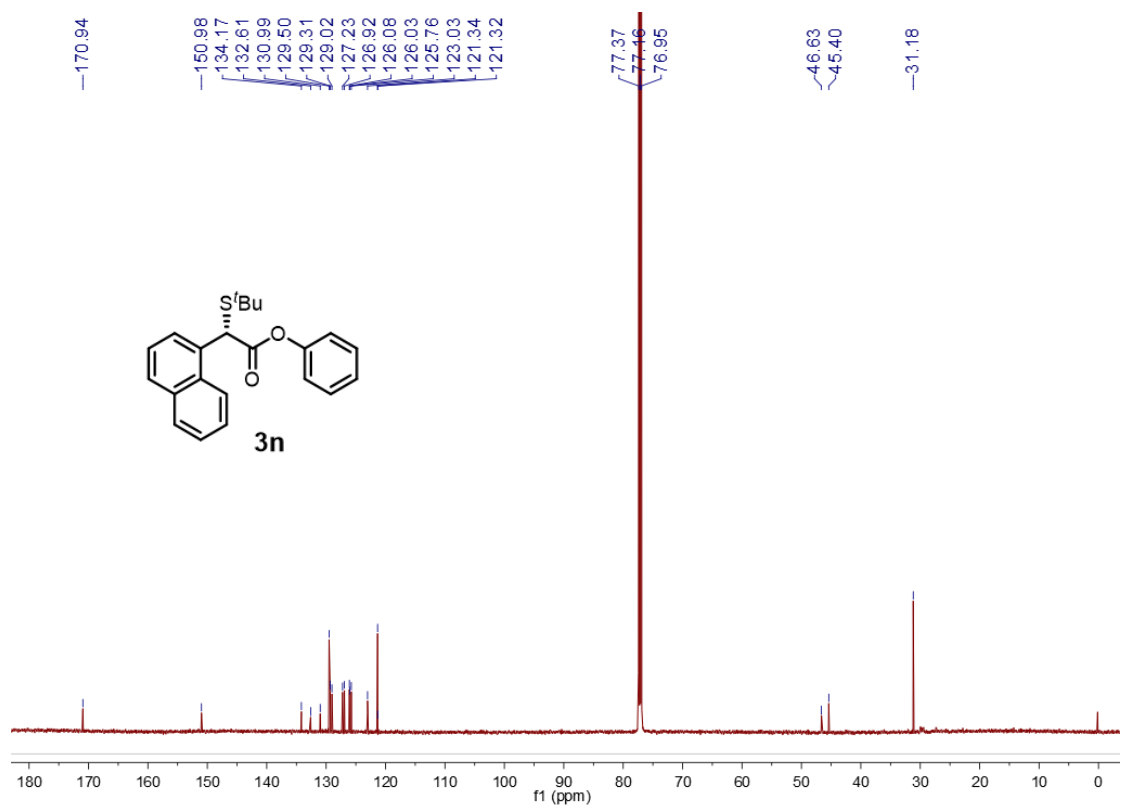



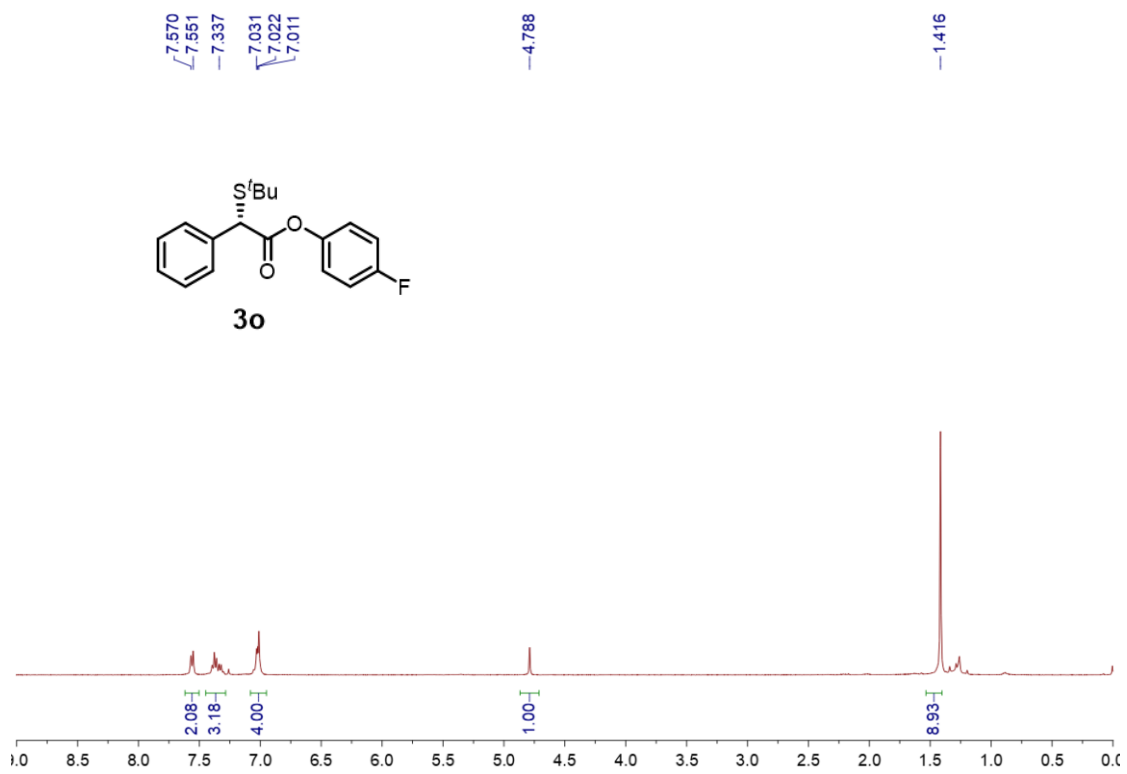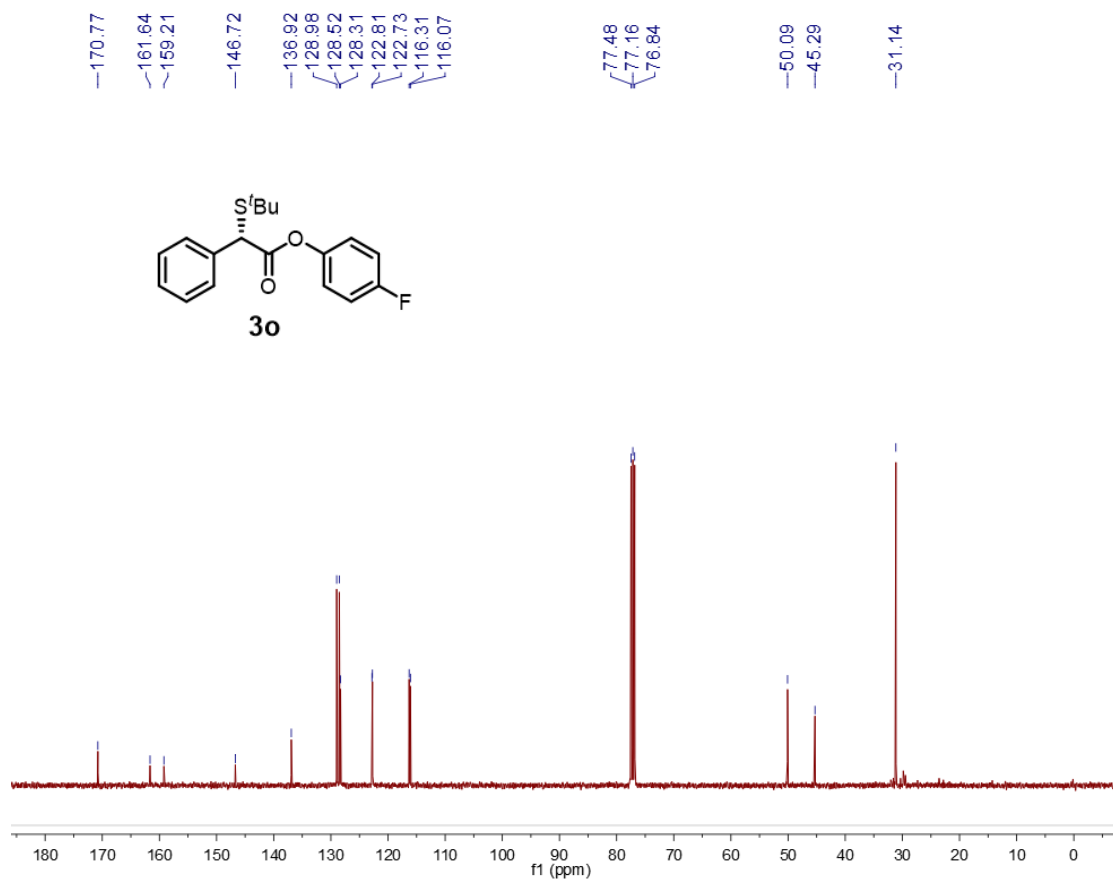

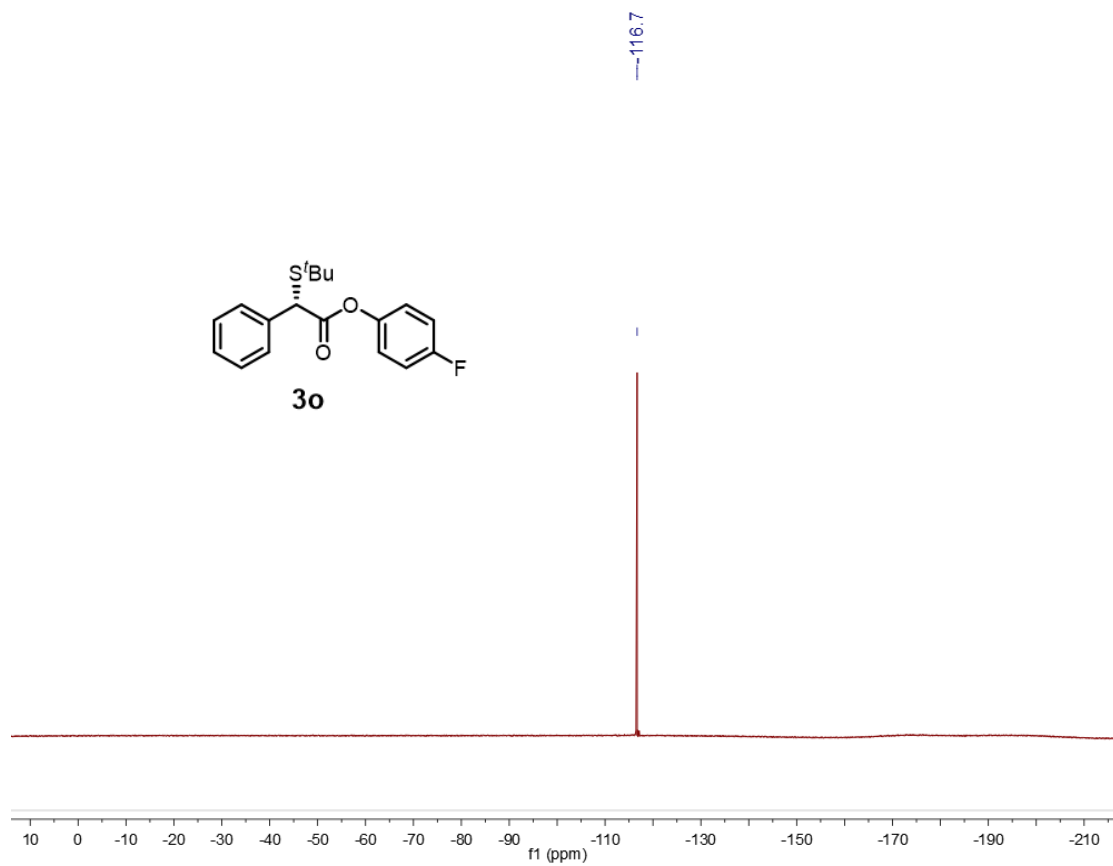

7.573  
7.554  
7.310  
6.969  
6.951  
6.859  
6.841  
-4.786  
-3.778  
-1.417

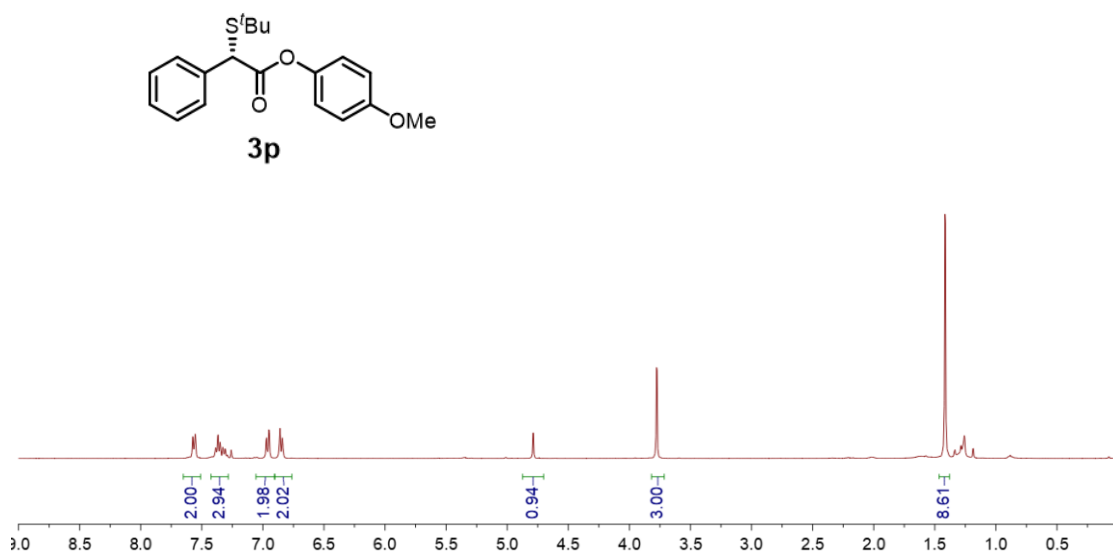

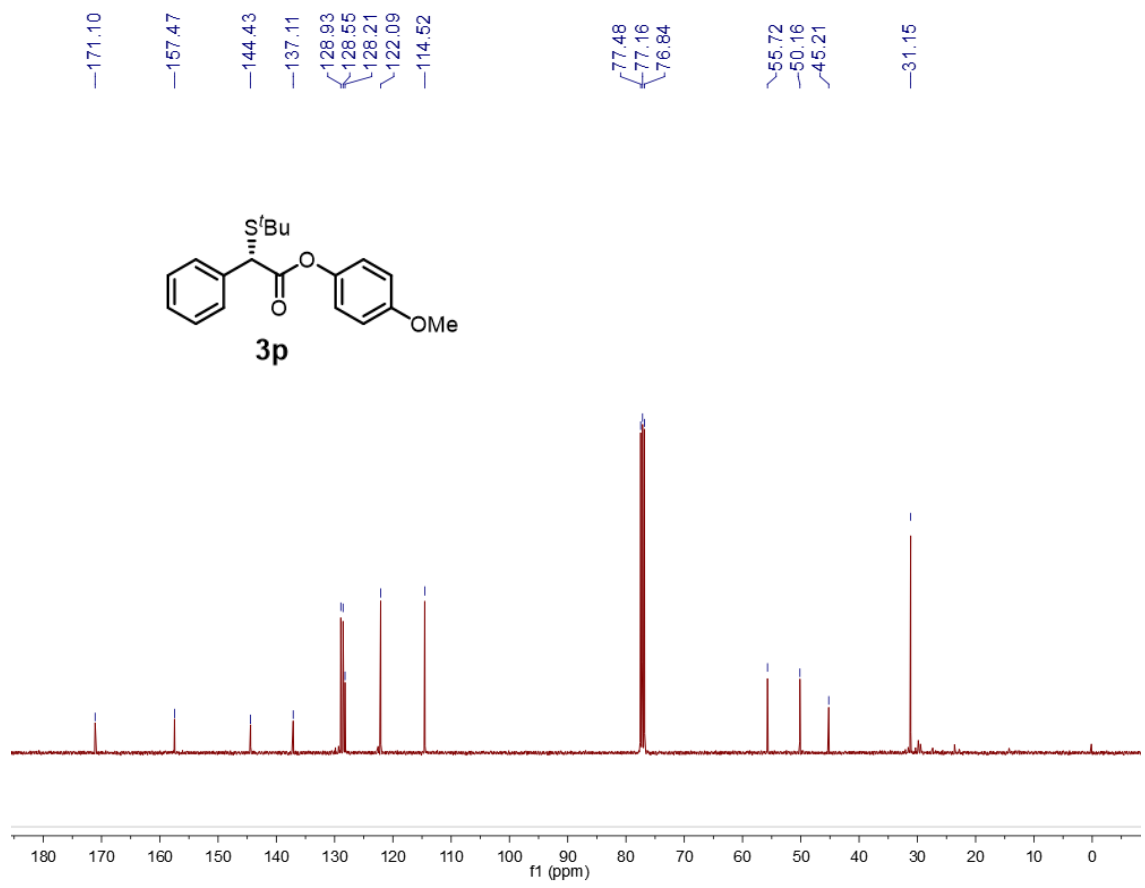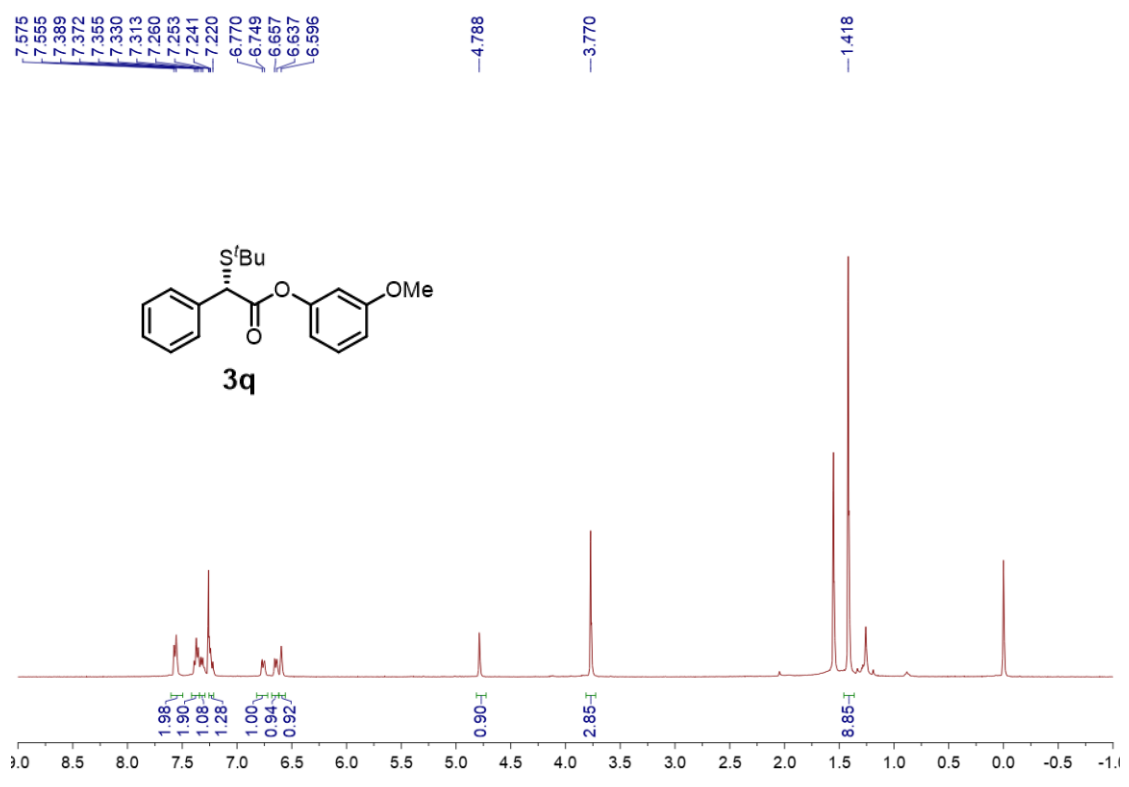

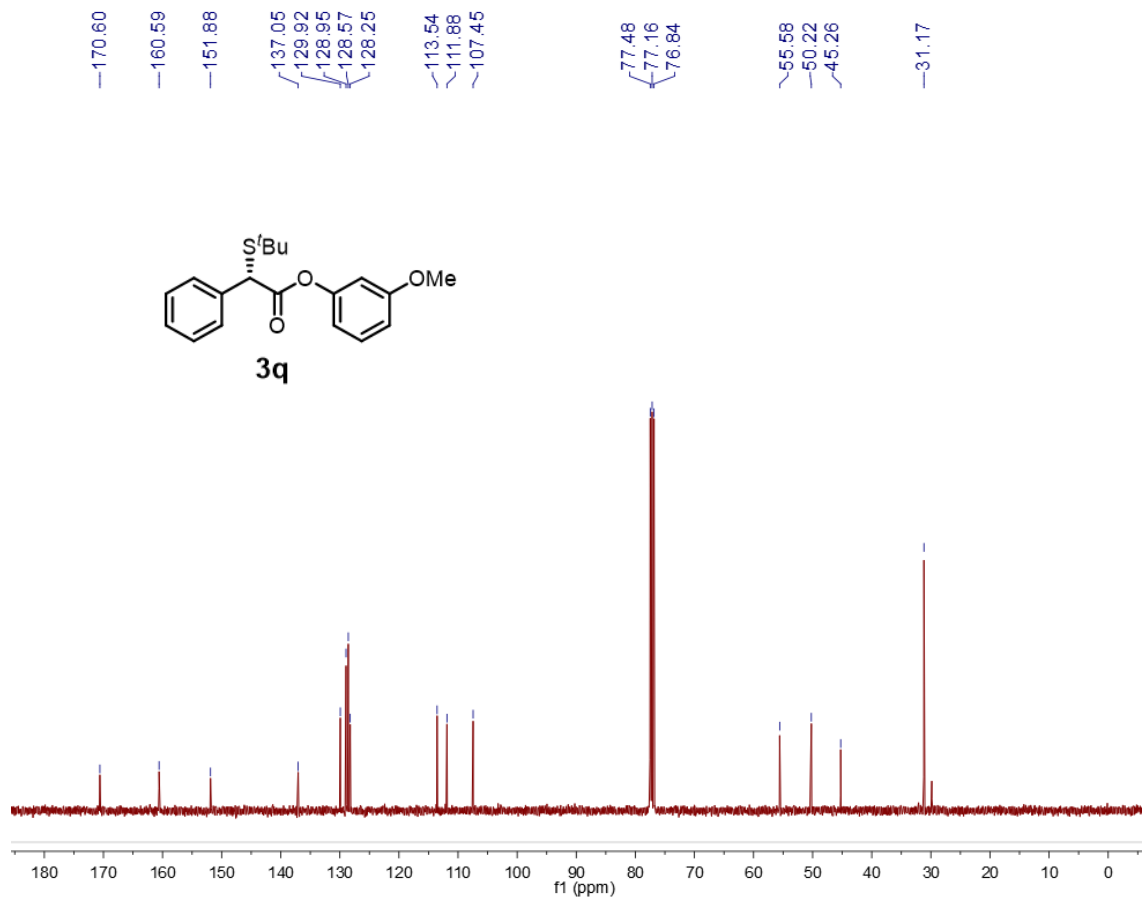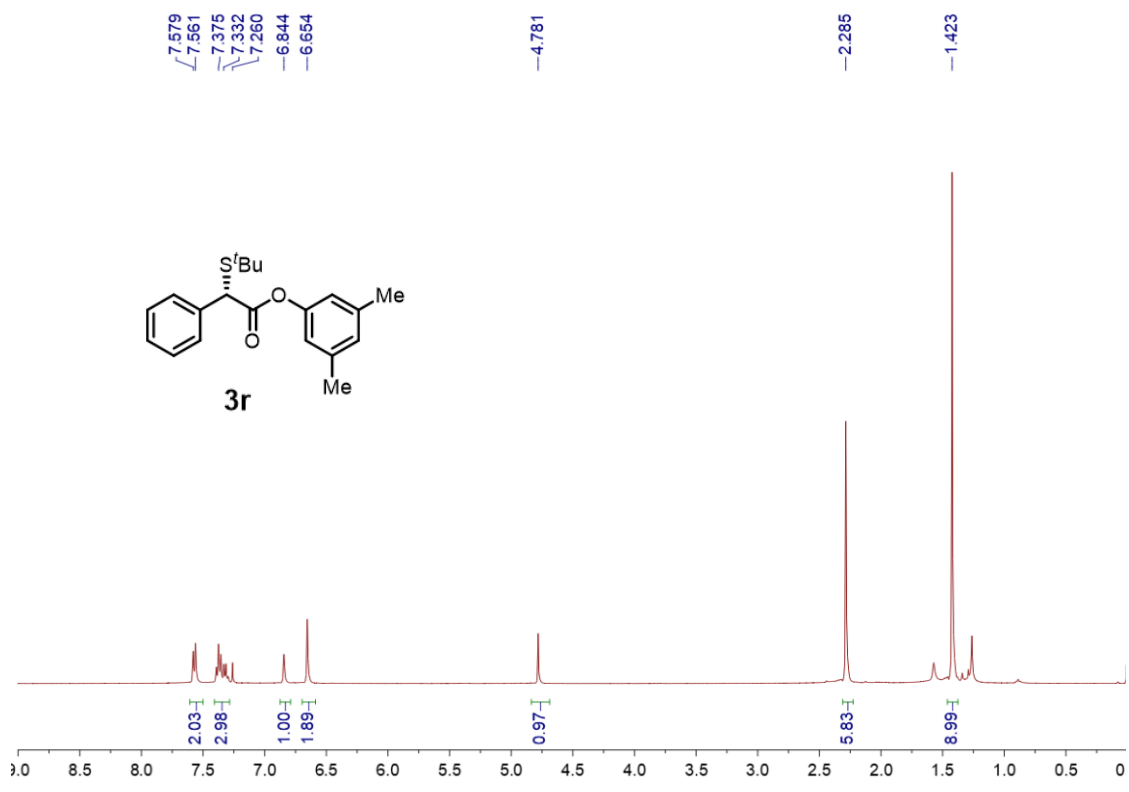

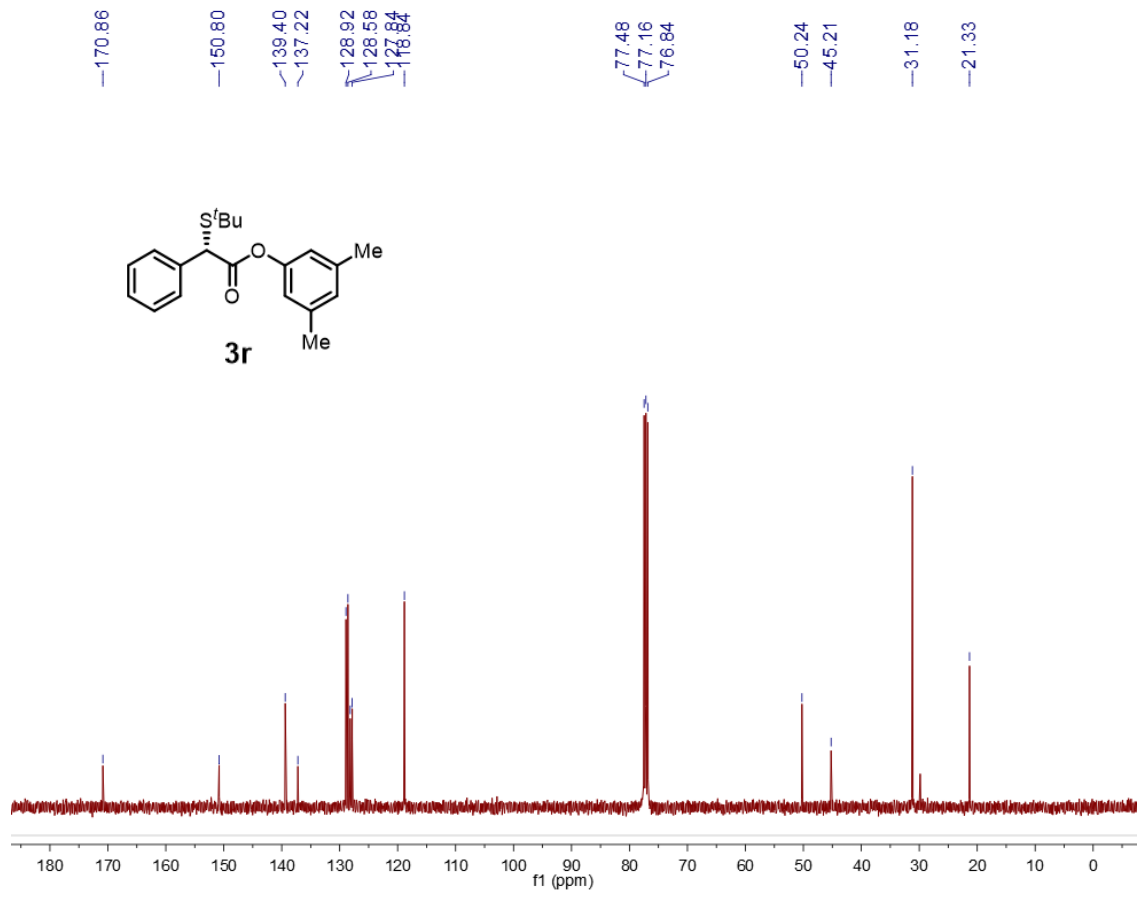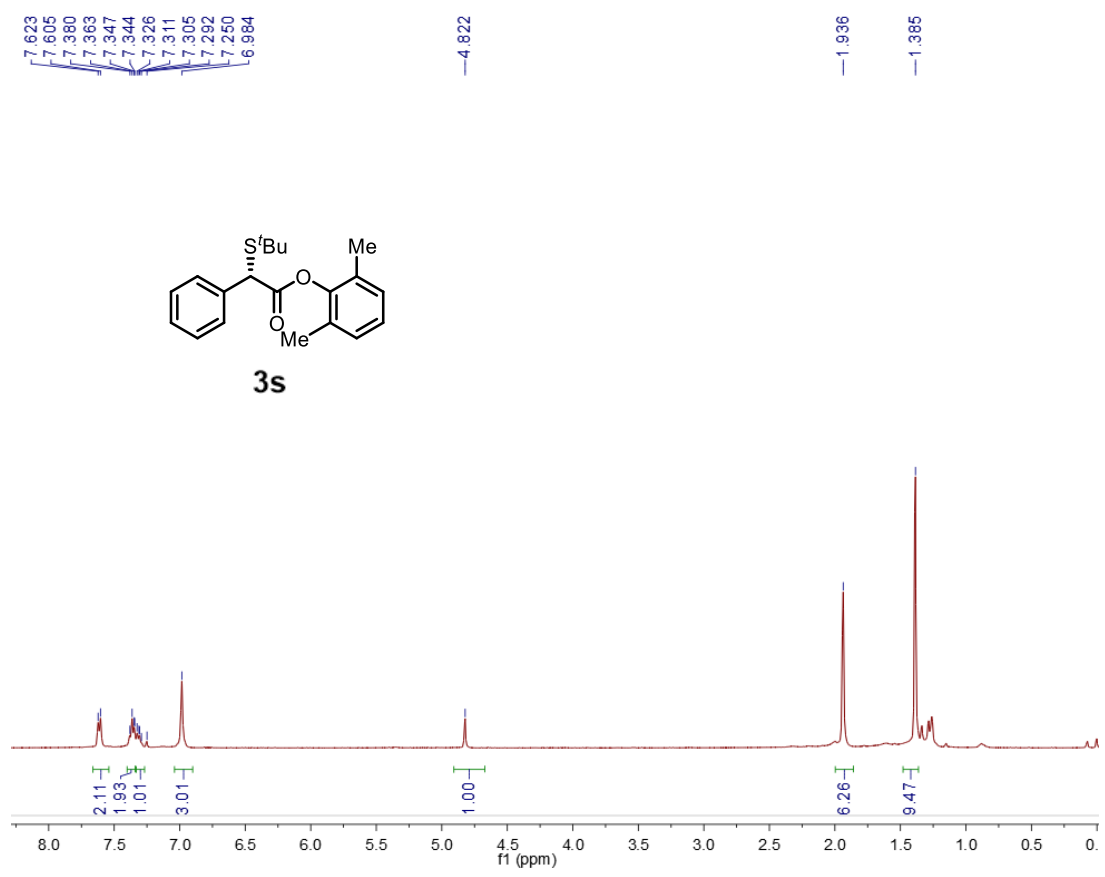

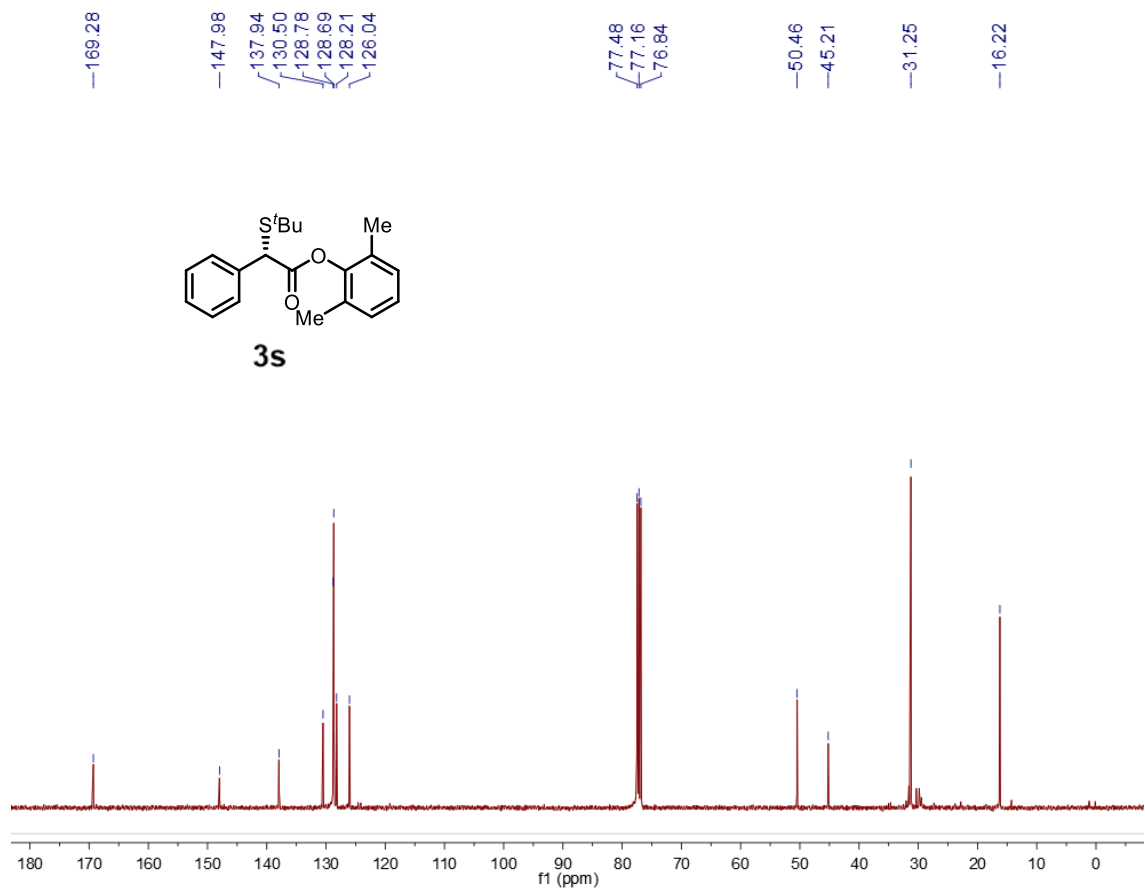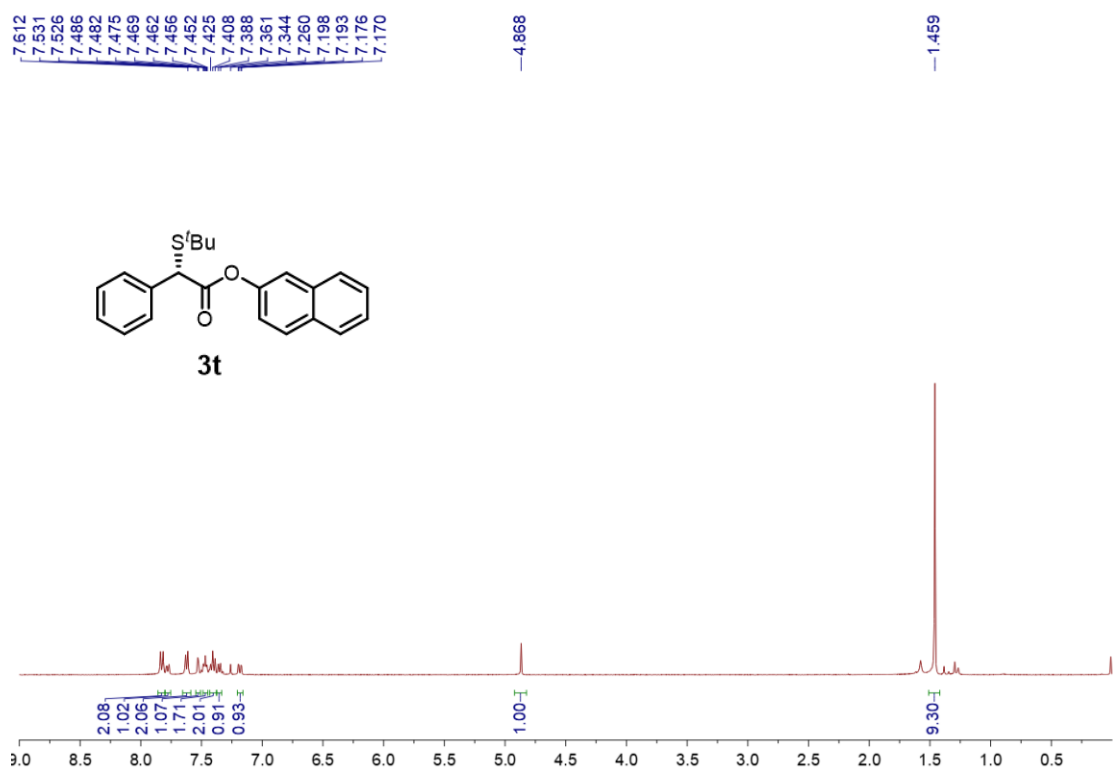

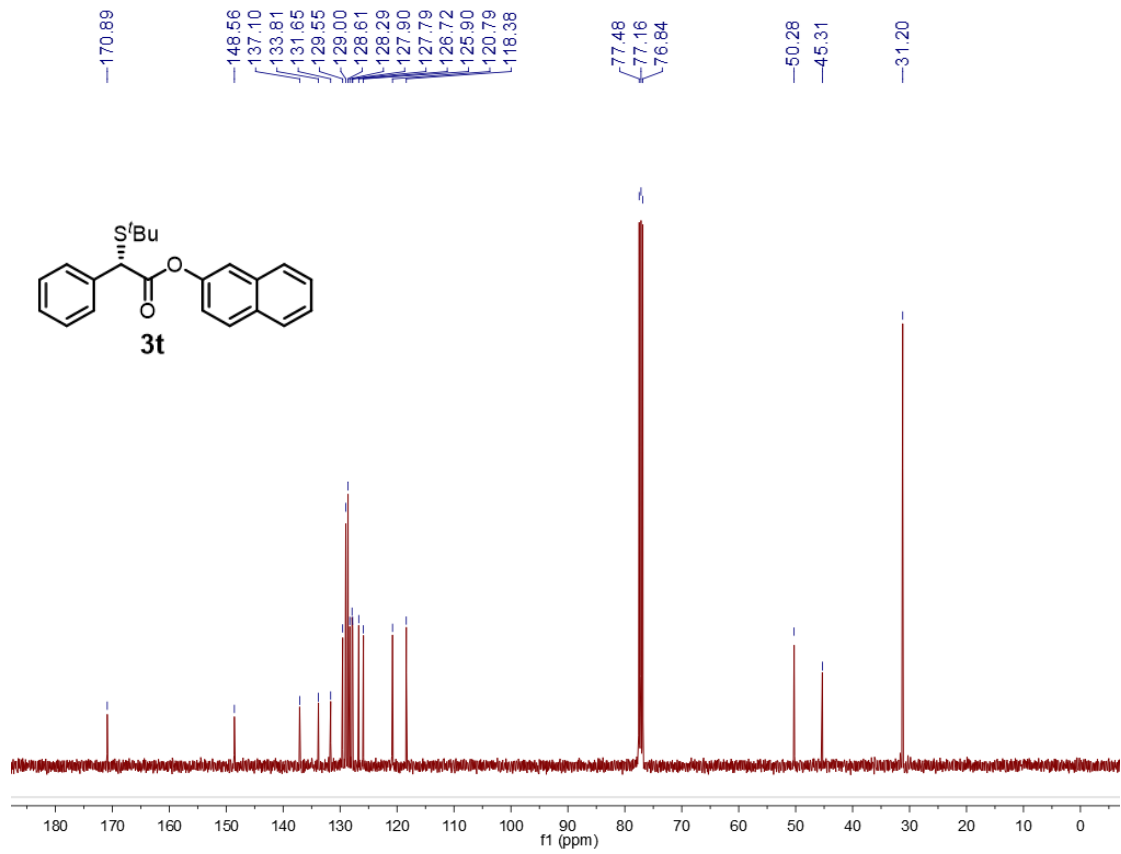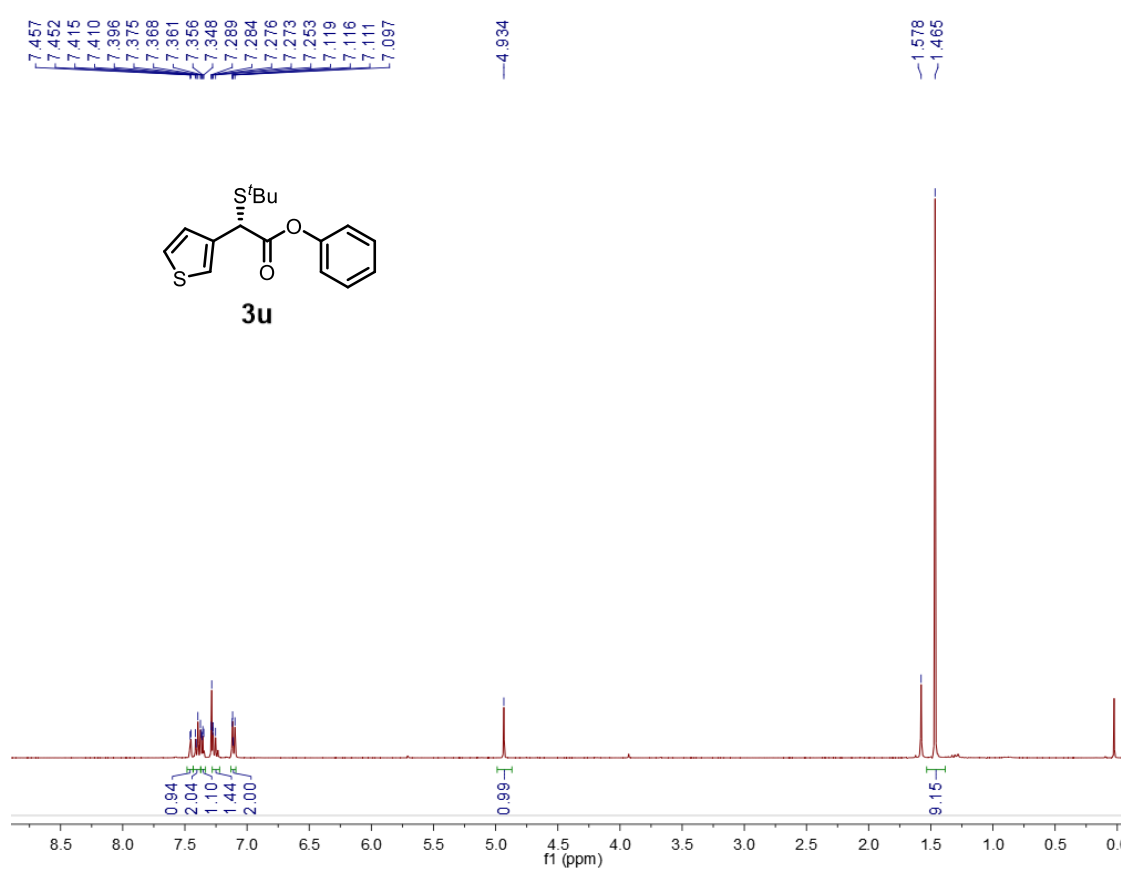

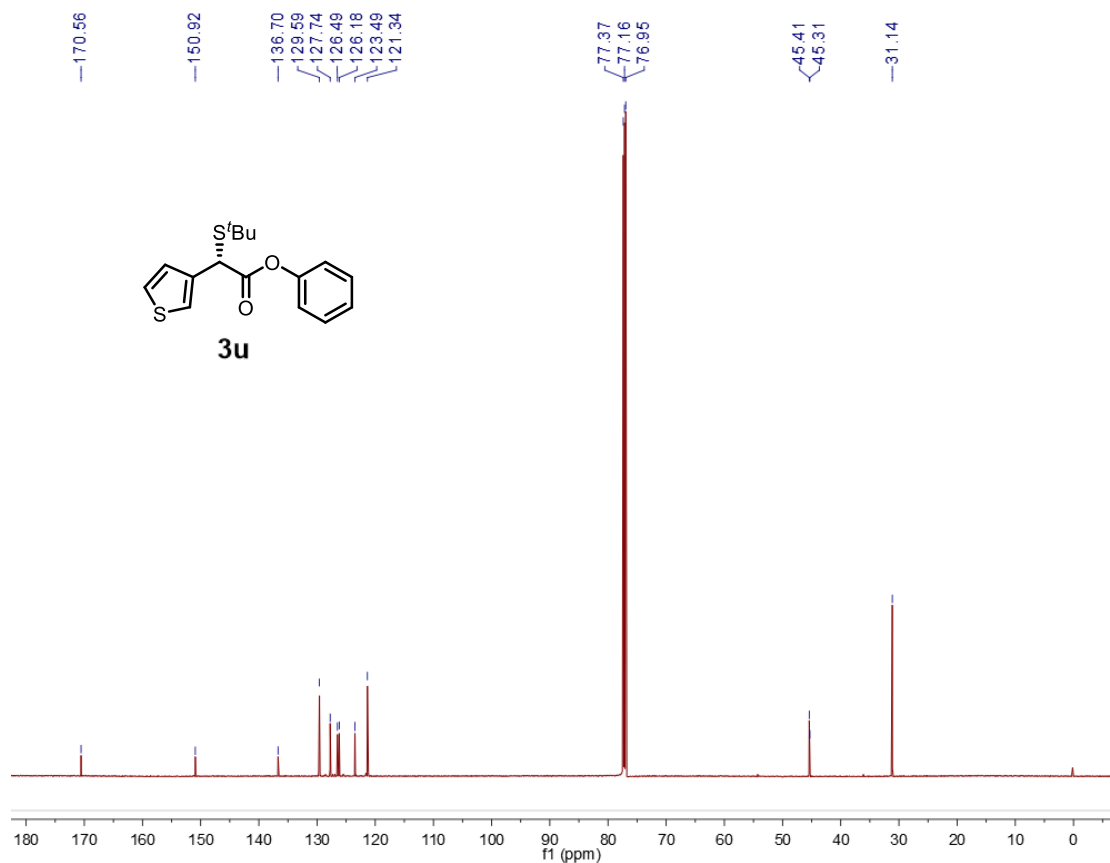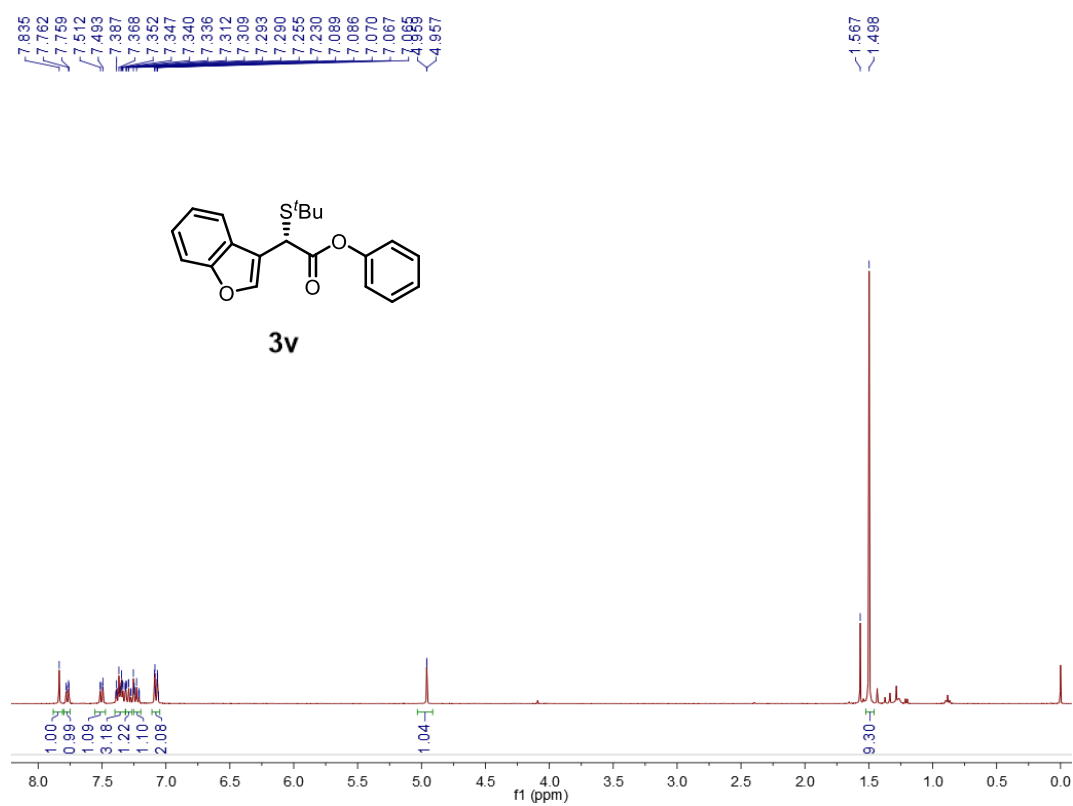



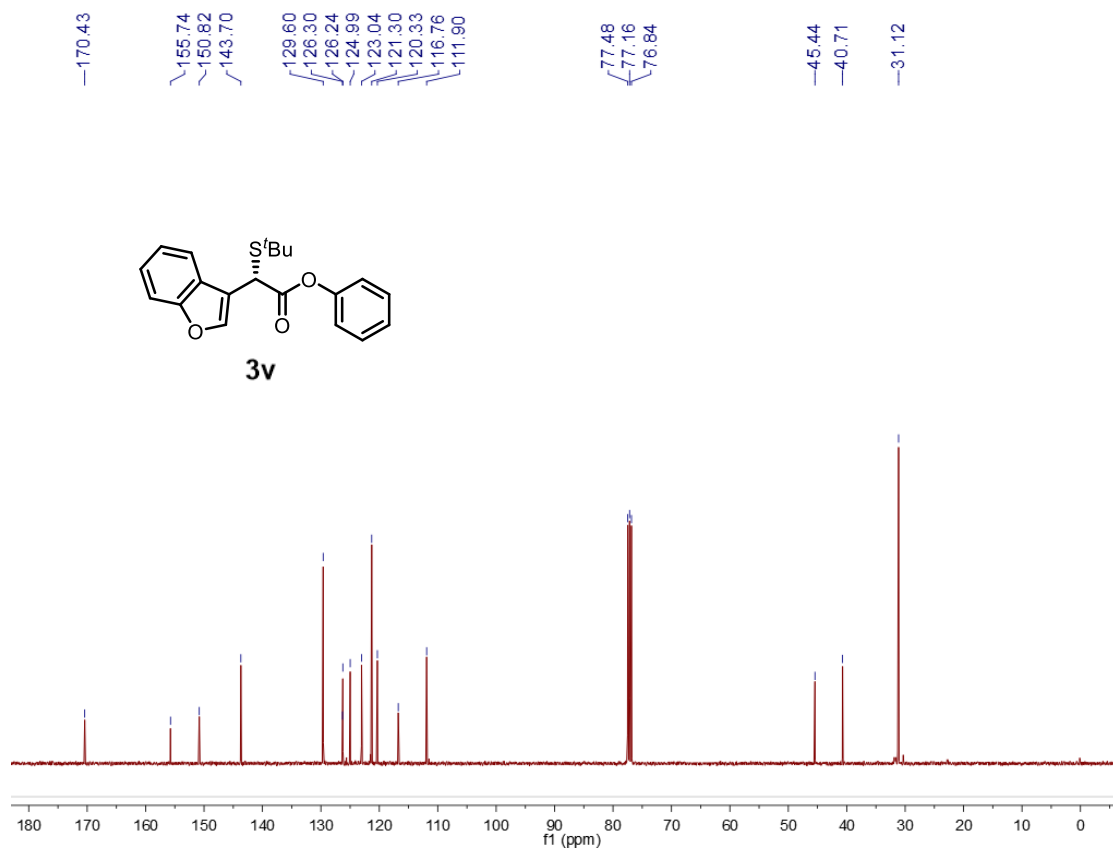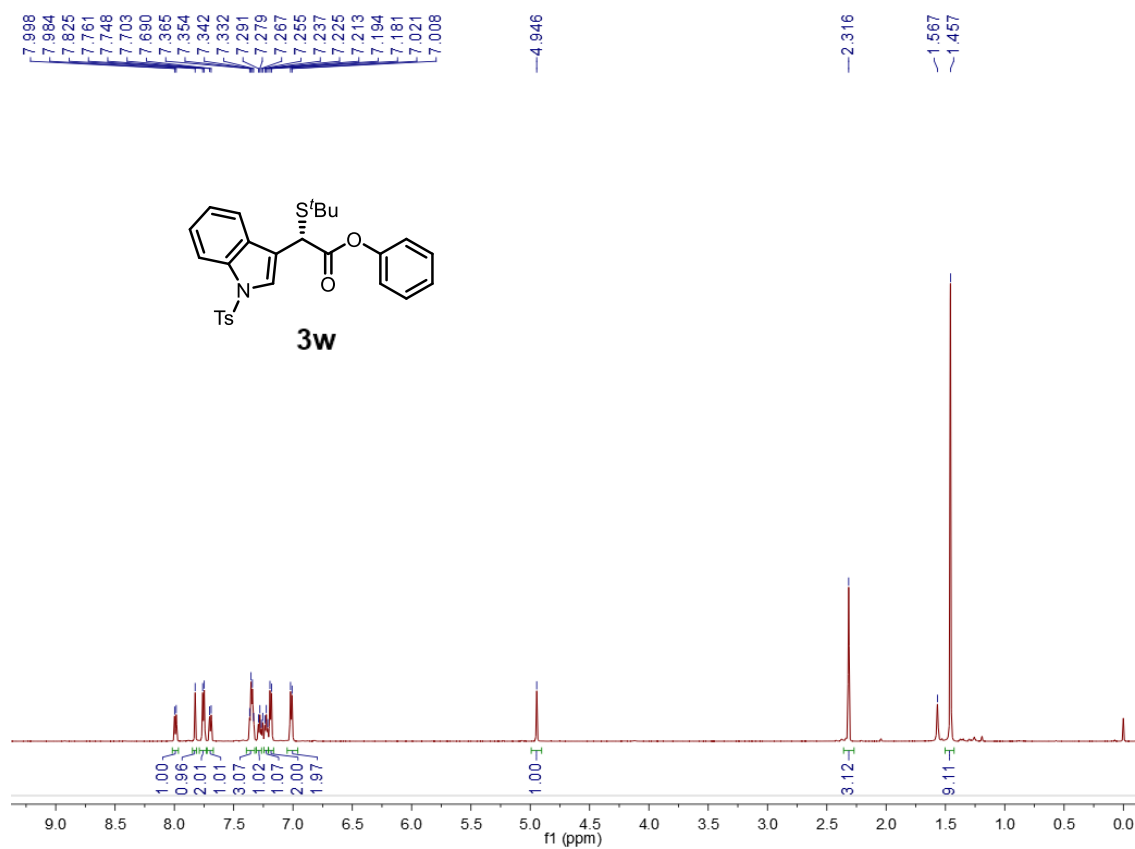

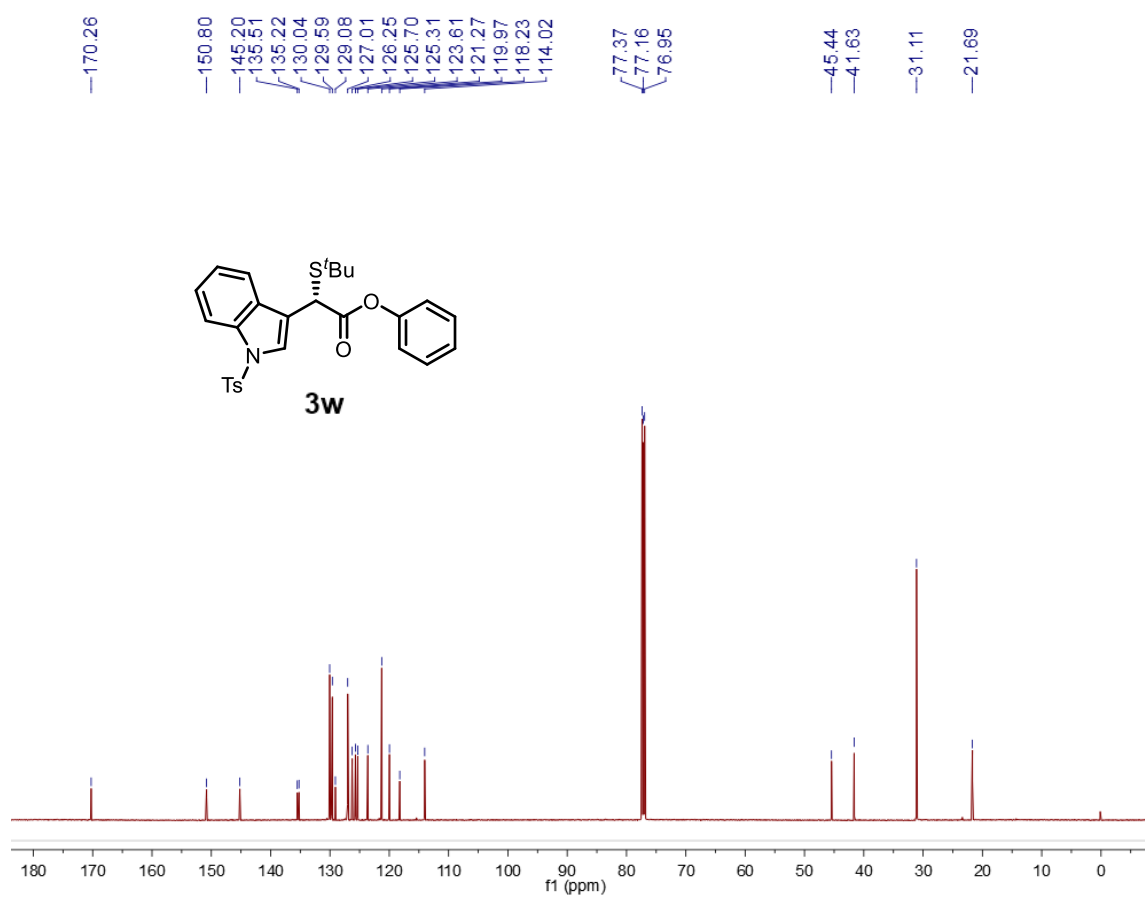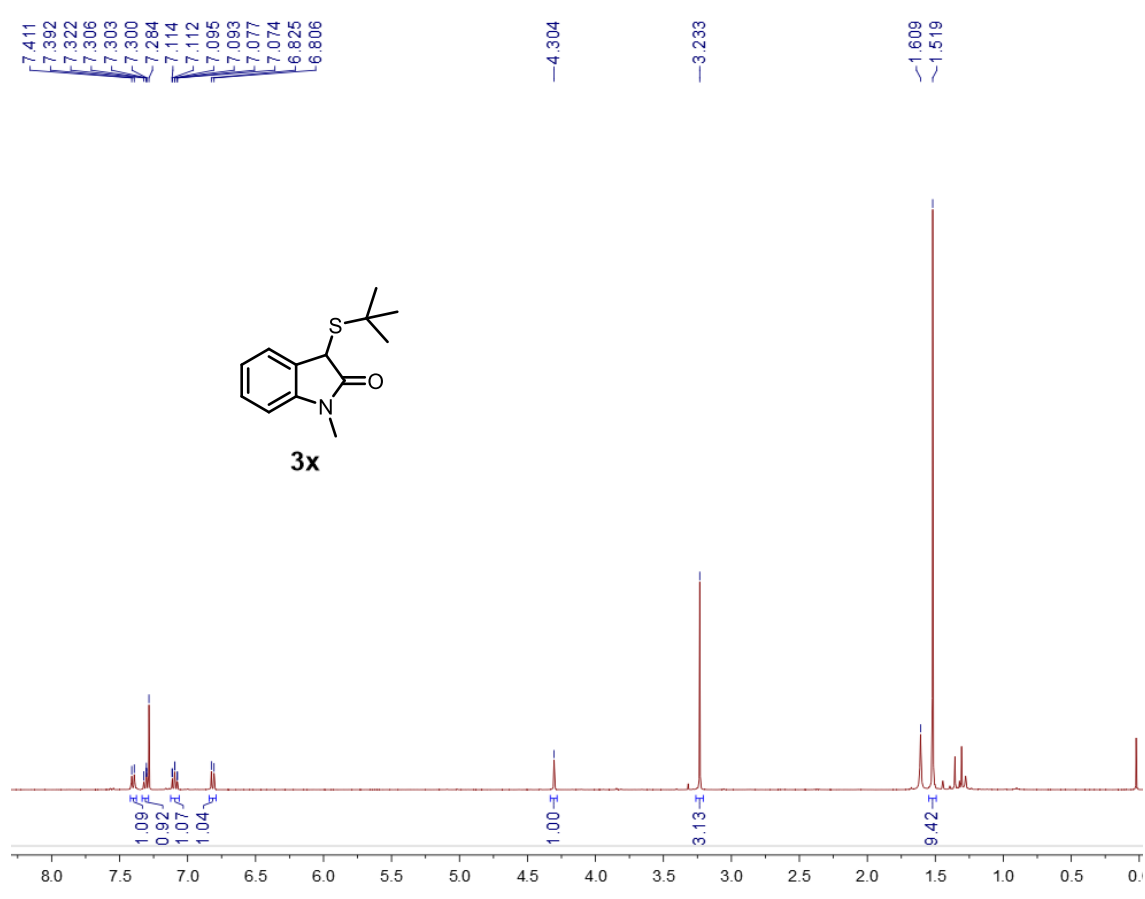

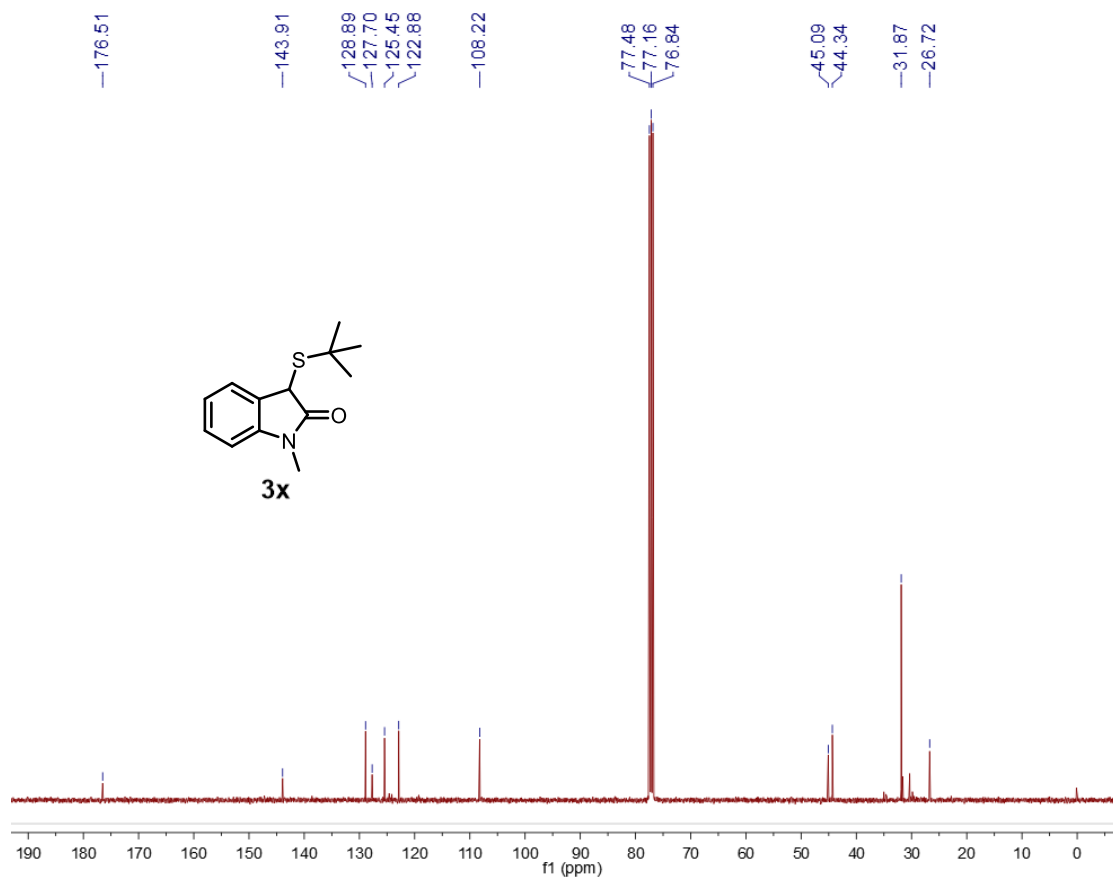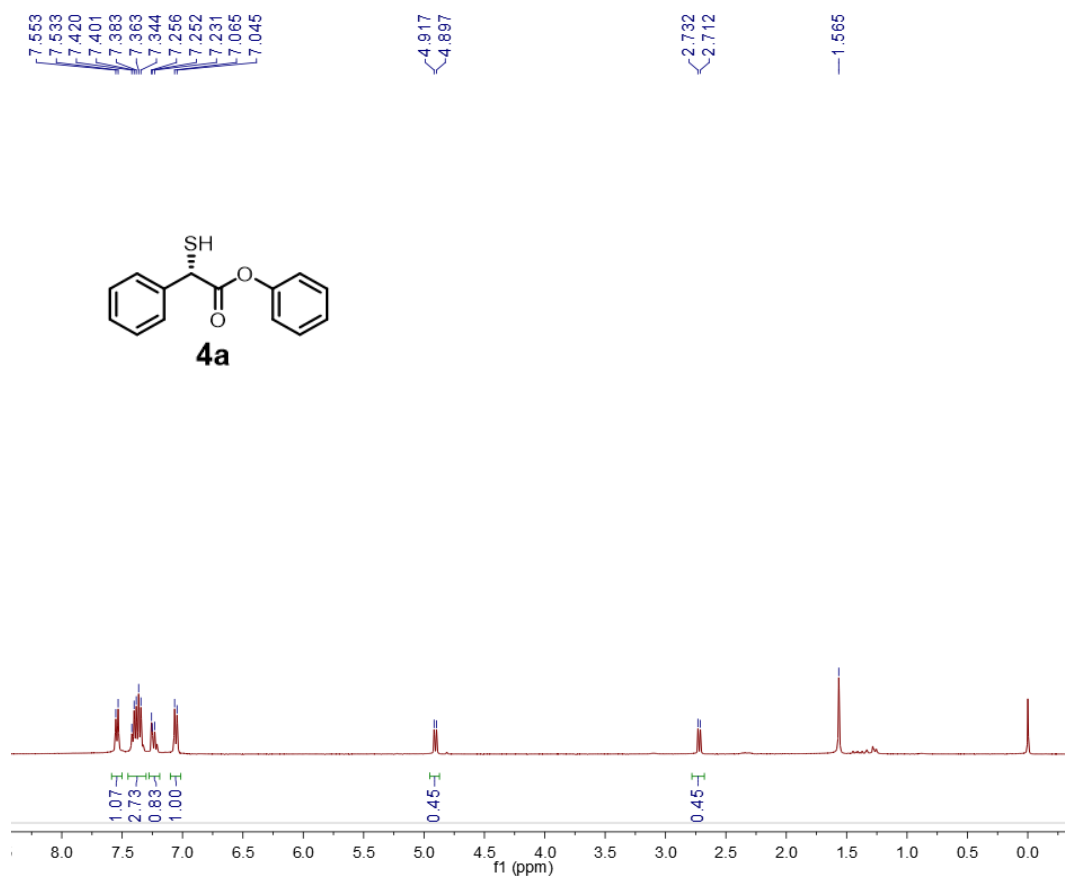

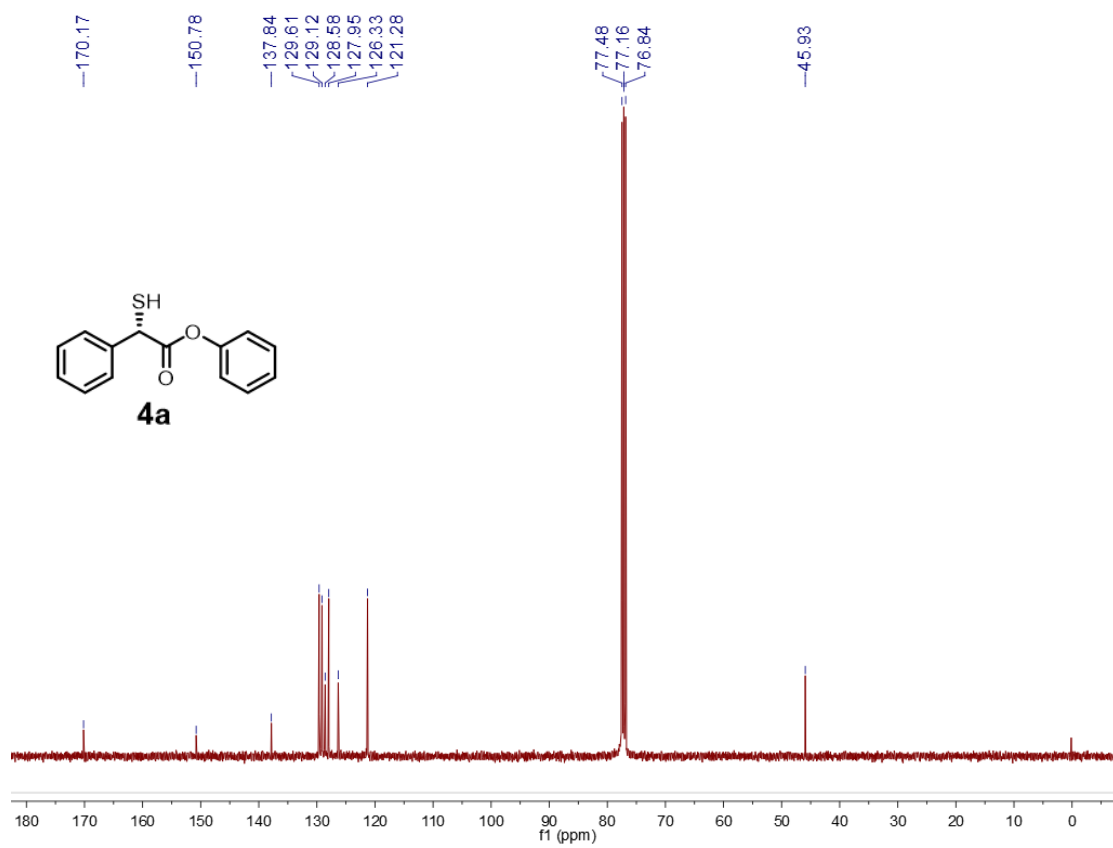

## 9. HPLC Spectra

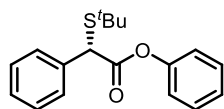

phenyl (*S*)-2-(*tert*-butylthio)-2-phenylacetate (**3a**).

HPLC: Chiralpak OZ-H column (250 mm); detected at 220 nm; hexane/*i*-propanol = 99/1; flow = 0.7 mL/min; Retention time: 8.1 min (major), 9.1 min, 70% ee.

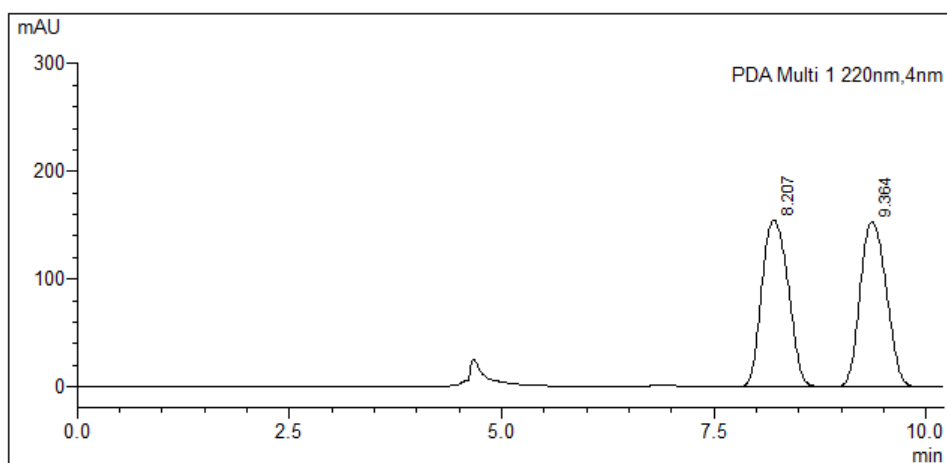

| PDA Ch1 220nm |          |        |         |          |
|---------------|----------|--------|---------|----------|
| Peak No.      | Ret Time | Height | Area    | Conc.(%) |
| 1             | 8.207    | 154762 | 3365815 | 50.272   |
| 2             | 9.364    | 153813 | 3329391 | 49.728   |

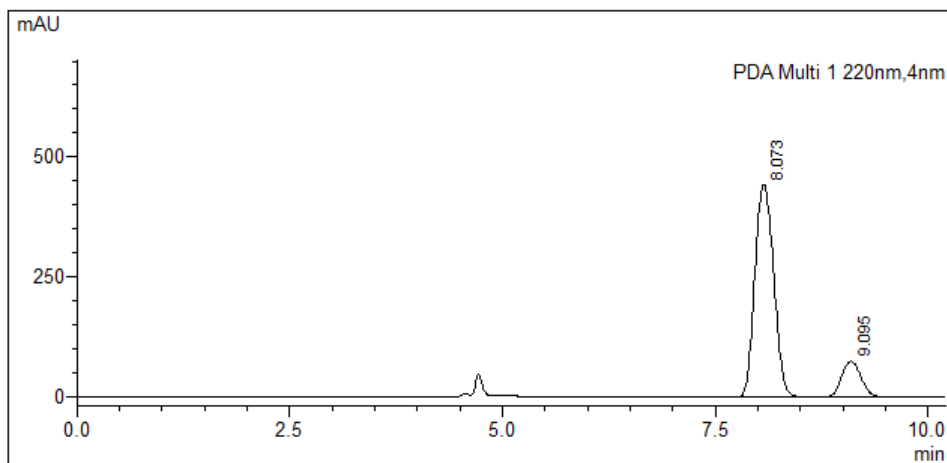

| PDA Ch1 220nm |          |        |         |          |
|---------------|----------|--------|---------|----------|
| Peak No.      | Ret Time | Height | Area    | Conc.(%) |
| 1             | 8.073    | 442280 | 6756101 | 85.301   |
| 2             | 9.095    | 73921  | 1164163 | 14.699   |

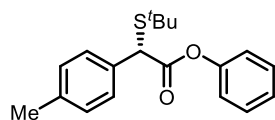

phenyl (*S*)-2-(*tert*-butylthio)-2-(*p*-tolyl)acetate (**3b**).

HPLC: Chiralpak OZ-H column (250 mm); detected at 220 nm; hexane/*i*-propanol = 99/1; flow = 0.7 mL/min; Retention time: 9.0 min, 10.1 min (major), 61% ee.

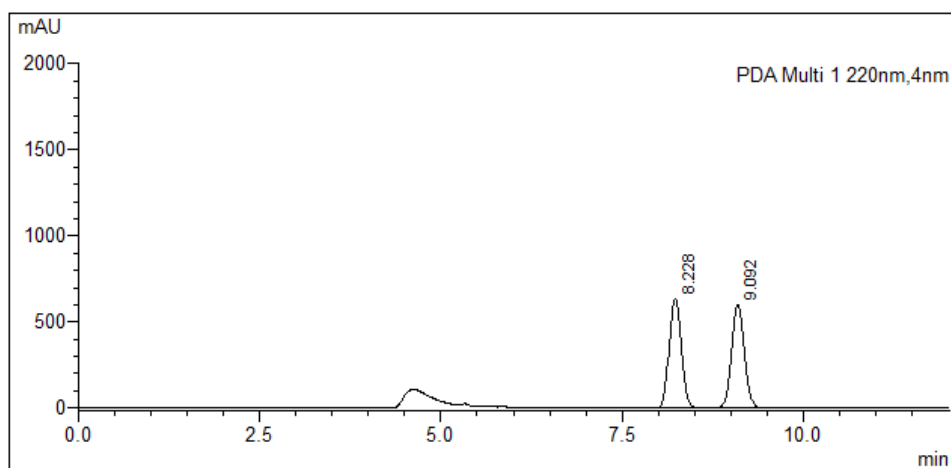

| PDA Ch1 220nm |          |        |         |          |
|---------------|----------|--------|---------|----------|
| Peak No.      | Ret Time | Height | Area    | Conc.(%) |
| 1             | 8.228    | 637576 | 7531278 | 49.963   |
| 2             | 9.092    | 599648 | 7542457 | 50.037   |

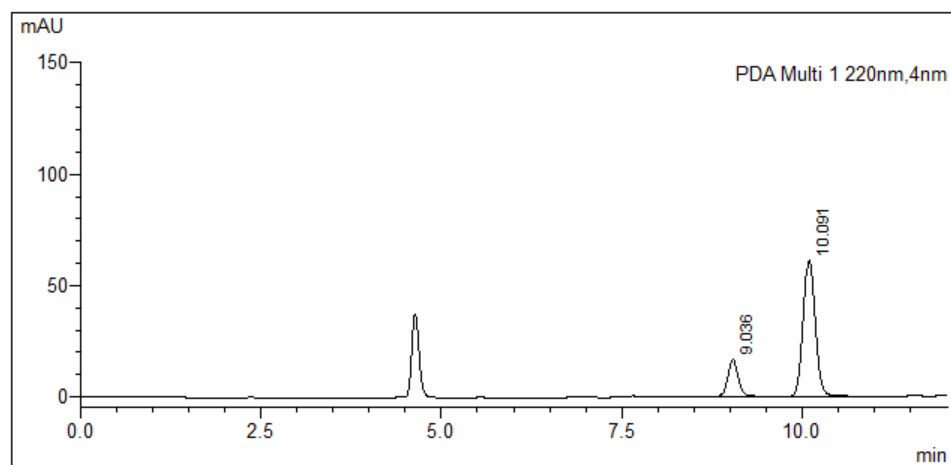

| PDA Ch1 220nm |          |        |        |          |
|---------------|----------|--------|--------|----------|
| Peak No.      | Ret Time | Height | Area   | Conc.(%) |
| 1             | 9.036    | 16639  | 168572 | 19.217   |
| 2             | 10.091   | 60996  | 708648 | 80.783   |

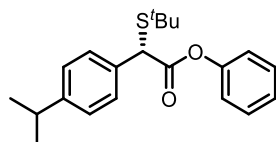

phenyl (*S*)-2-(tert-butylthio)-2-(4-isopropylphenyl)acetate (**3c**)

HPLC: Chiralpak OZ-H column (250 mm); detected at 254 nm; hexane/*i*-propanol = 99/1; flow = 1.0 mL/min; Retention time: 4.32 min, 4.85 min (major), 77% ee.

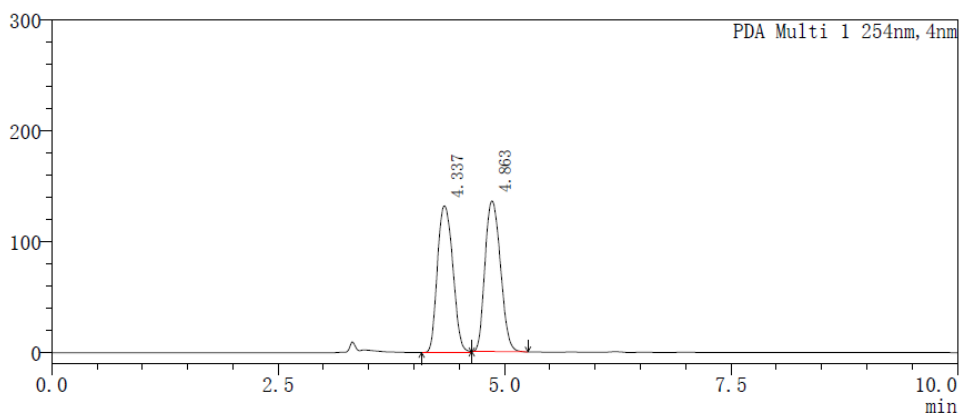

PDA Ch1 254nm

| Number | Retention | Area    | Height | Area%  |
|--------|-----------|---------|--------|--------|
| 1      | 4.337     | 1577191 | 132438 | 49.288 |
| 2      | 4.863     | 1622789 | 135824 | 50.712 |

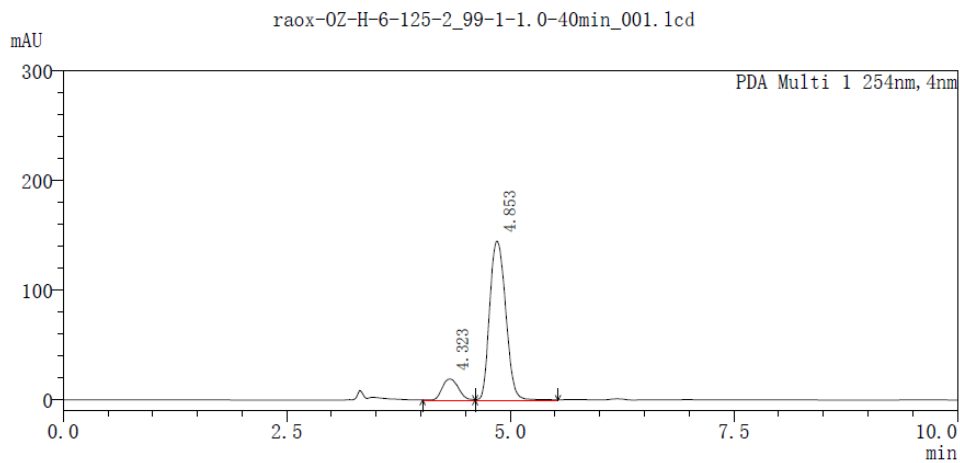

PDA Ch1 254nm

| Number | Retention | Area    | Height | Area%  |
|--------|-----------|---------|--------|--------|
| 1      | 4.323     | 242070  | 19251  | 11.763 |
| 2      | 4.853     | 1815884 | 145115 | 88.237 |

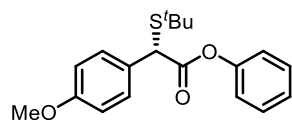

phenyl (*S*)-2-(*tert*-butylthio)-2-(4-methoxyphenyl)acetate (**3d**).

HPLC: Chiralpak OZ-H column (250 mm); detected at 220 nm; hexane/*i*-propanol = 99/1; flow = 0.7 mL/min; Retention time: 10.6 min (major), 13.3 min, 82% ee.

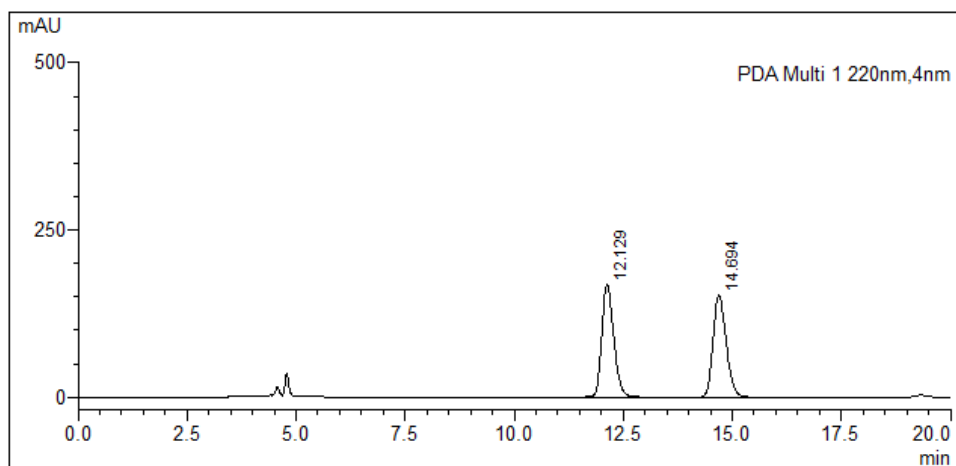

| PDA Ch1 220nm |          |        |         |           |
|---------------|----------|--------|---------|-----------|
| Peak No.      | Ret Time | Height | Area    | Conc. (%) |
| 1             | 12.129   | 168342 | 3265263 | 50.203    |
| 2             | 14.694   | 152518 | 3238884 | 49.797    |

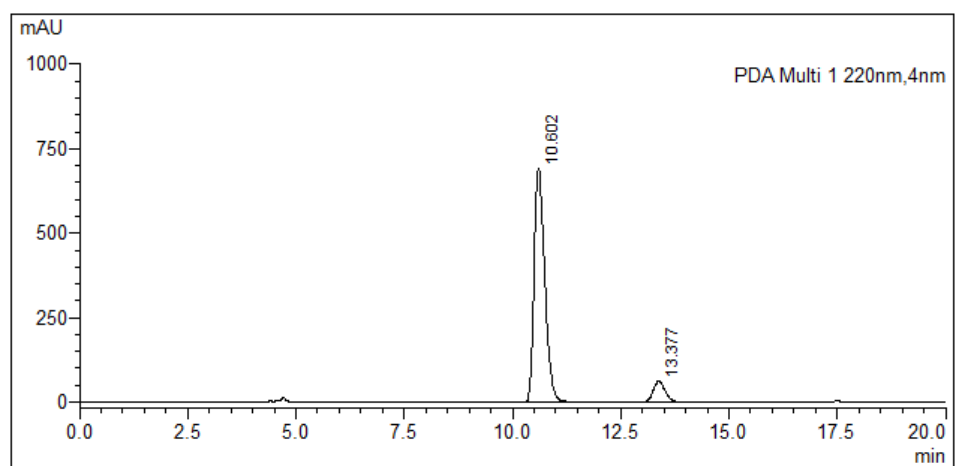

| PDA Ch1 220nm |          |        |          |           |
|---------------|----------|--------|----------|-----------|
| Peak No.      | Ret Time | Height | Area     | Conc. (%) |
| 1             | 10.602   | 690043 | 11888710 | 91.003    |
| 2             | 13.377   | 60851  | 1175354  | 8.997     |



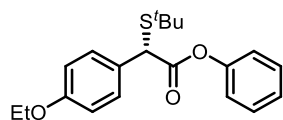

phenyl (*S*)-2-(tert-butylthio)-2-(4-ethoxyphenyl)acetate (**3e**)

HPLC: Chiralpak IC-3 column (250 mm); detected at 254 nm; hexane/*i*-propanol = 99/1; flow = 1.0 mL/min; Retention time: 14.4 min, 18.2 min (major), 79% ee.

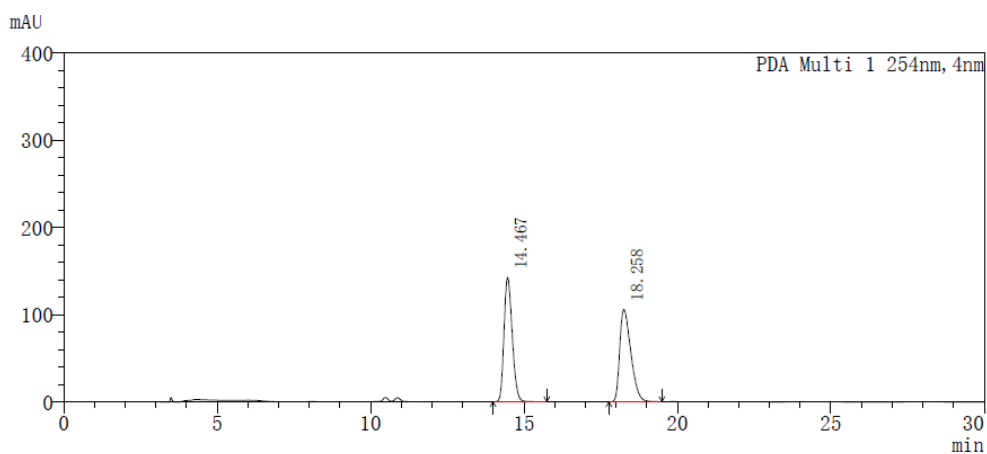

PDA Ch1 254nm

| Number | Retention | Area    | Height | Area%  |
|--------|-----------|---------|--------|--------|
| 1      | 14.467    | 2656376 | 142226 | 49.901 |
| 2      | 18.258    | 2666866 | 105675 | 50.099 |

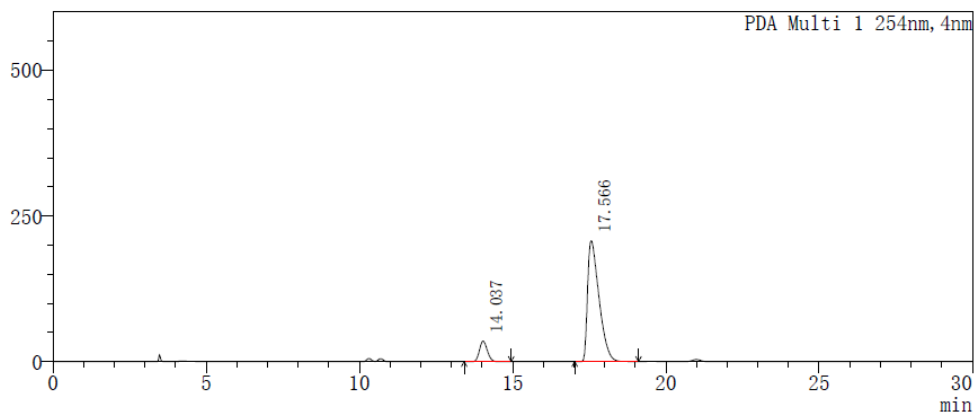

PDA Ch1 254nm

| Number | Retention | Area    | Height | Area%  |
|--------|-----------|---------|--------|--------|
| 1      | 14.037    | 638430  | 35392  | 10.550 |
| 2      | 17.566    | 5413235 | 207724 | 89.450 |

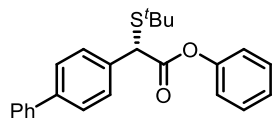

phenyl (*S*)-2-([1,1'-biphenyl]-4-yl)-2-(tert-butylthio)acetate (**3f**)

HPLC: Chiralpak IC-3 column (250 mm); detected at 254 nm; hexane/*i*-propanol = 99/1; flow = 1.0 mL/min; Retention time: 11.0 min, 13.9 min (major), 63% ee.

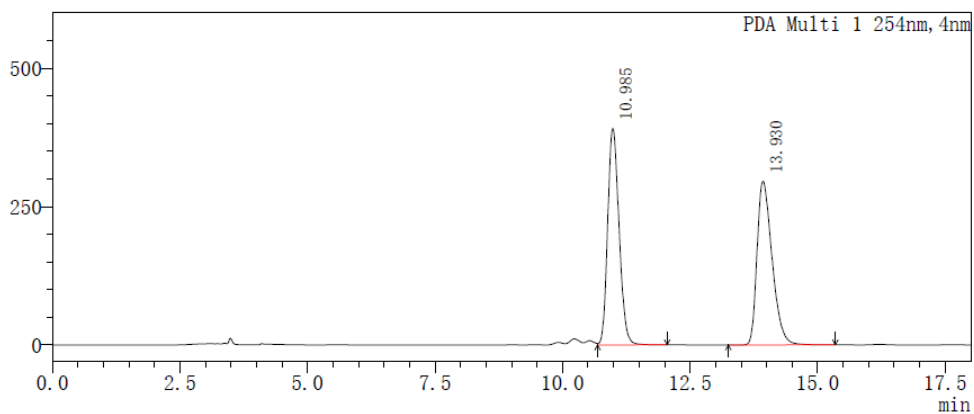

PDA Ch1 254nm

| Number | Retention | Area    | Height | Area%  |
|--------|-----------|---------|--------|--------|
| 1      | 10.985    | 6065830 | 390927 | 50.026 |
| 2      | 13.930    | 6059614 | 295792 | 49.974 |

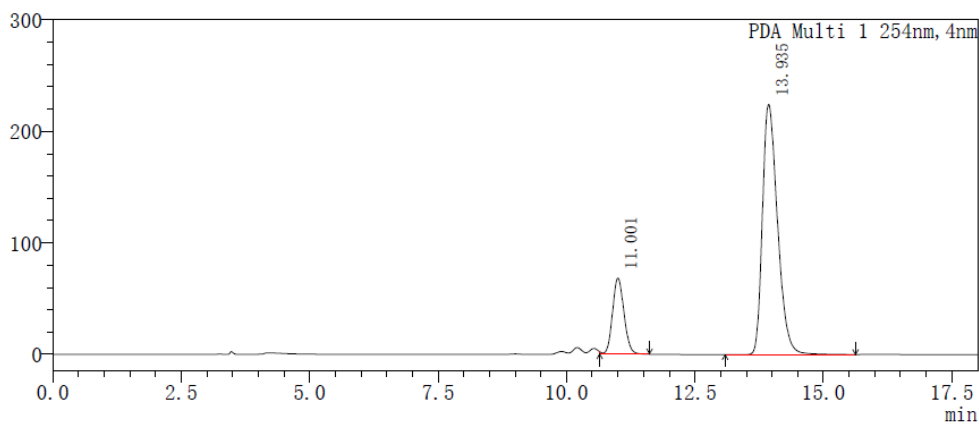

PDA Ch1 254nm

| Number | Retention | Area    | Height | Area%  |
|--------|-----------|---------|--------|--------|
| 1      | 11.001    | 1035956 | 67749  | 18.439 |
| 2      | 13.935    | 4582457 | 224405 | 81.561 |

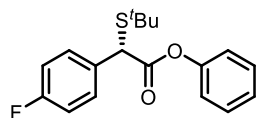

phenyl (*S*)-2-(*tert*-butylthio)-2-(4-fluorophenyl)acetate (**3g**).

HPLC: Chiralpak OJ-3 column (250 mm); detected at 220 nm; hexane/*i*-propanol = 99/1; flow = 0.7 mL/min; Retention time: 32.3 min (major), 36.6 min, 68% ee.

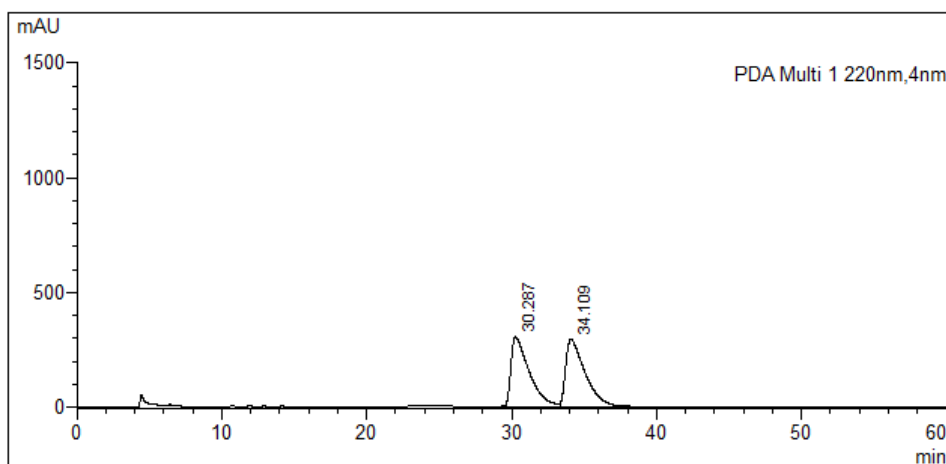

| PDA Ch1 220nm |          |        |          |          |
|---------------|----------|--------|----------|----------|
| Peak No.      | Ret Time | Height | Area     | Conc.(%) |
| 1             | 30.287   | 302723 | 26461867 | 49.299   |
| 2             | 34.109   | 293680 | 27214498 | 50.701   |

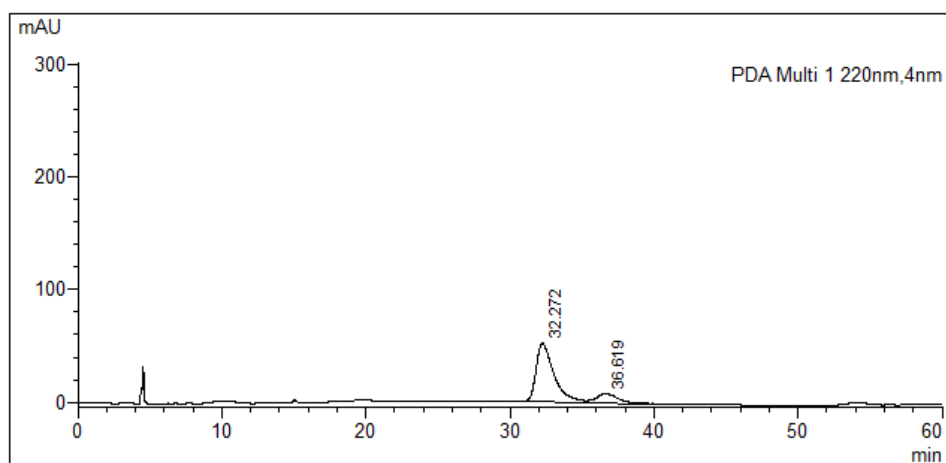

| PDA Ch1 220nm |          |        |         |          |
|---------------|----------|--------|---------|----------|
| Peak No.      | Ret Time | Height | Area    | Conc.(%) |
| 1             | 32.272   | 51750  | 4441800 | 84.294   |
| 2             | 36.619   | 7884   | 827595  | 15.706   |

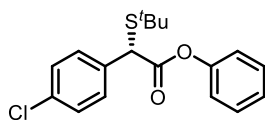

phenyl (*S*)-2-(*tert*-butylthio)-2-(4-chlorophenyl)acetate (**3h**).

HPLC: Chiralpak OJ-3 column (250 mm); detected at 220 nm; hexane/*i*-propanol = 99/1; flow = 0.7 mL/min; Retention time: 25.0 min (major), 31.2 min, 46% ee.

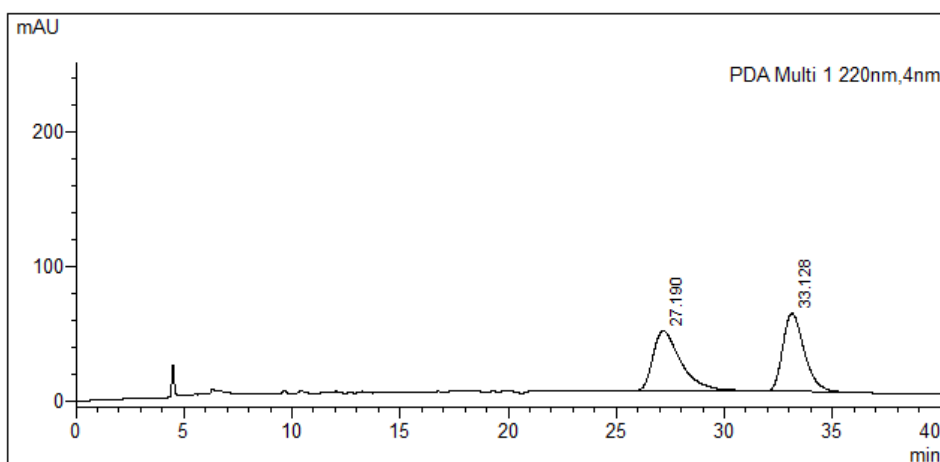

| Peak No. | Ret Time | Height | Area    | Conc. (%) |
|----------|----------|--------|---------|-----------|
| 1        | 27.190   | 44412  | 4057780 | 50.008    |
| 2        | 33.128   | 57964  | 4056452 | 49.992    |

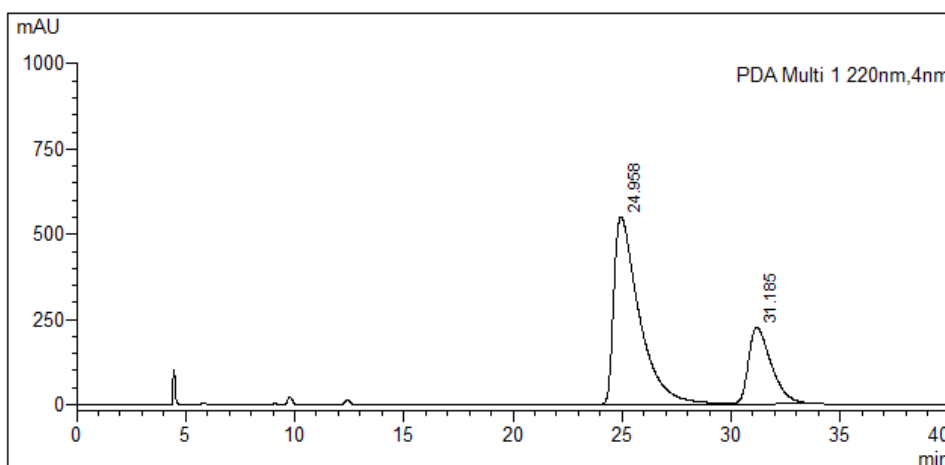

| Peak No. | Ret Time | Height | Area     | Conc. (%) |
|----------|----------|--------|----------|-----------|
| 1        | 24.958   | 551062 | 44721846 | 73.252    |
| 2        | 31.185   | 224572 | 16330096 | 26.748    |

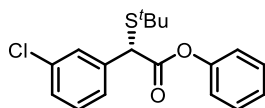

phenyl (*S*)-2-(*tert*-butylthio)-2-(3-chlorophenyl)acetate (**3i**).

HPLC: Chiralpak OZ-H column (250 mm); detected at 220 nm; hexane/*i*-propanol = 99/1; flow = 0.7 mL/min; Retention time: 6.6 min (major), 7.0 min, 40% ee.

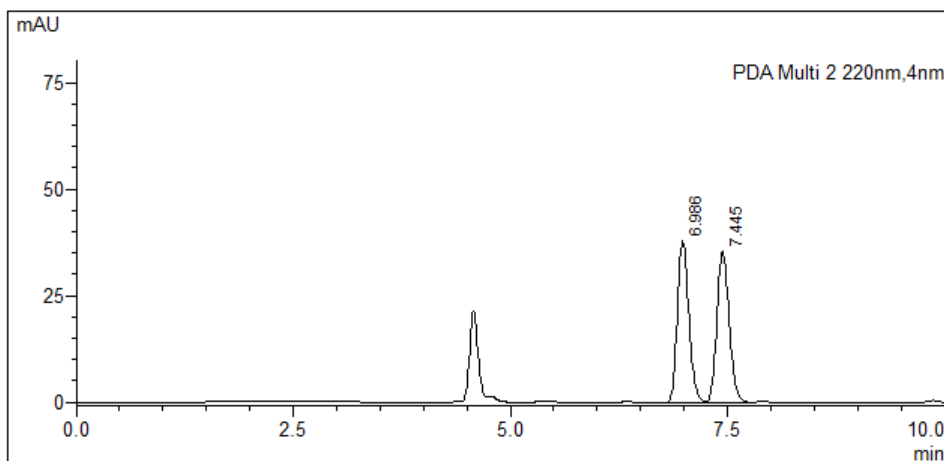

| PDA Ch2 220nm |          |        |        |           |
|---------------|----------|--------|--------|-----------|
| Peak No.      | Ret Time | Height | Area   | Conc. (%) |
| 1             | 6.986    | 37989  | 350977 | 49.925    |
| 2             | 7.445    | 35672  | 352028 | 50.075    |

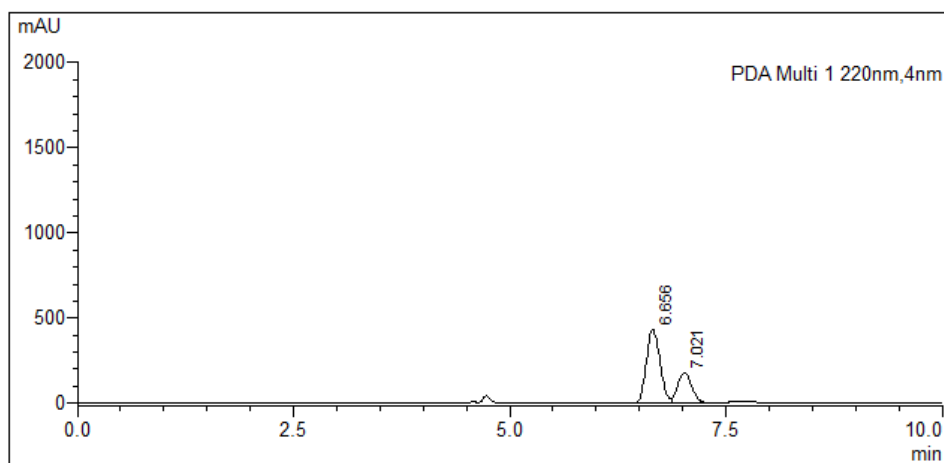

| PDA Ch1 220nm |          |        |         |           |
|---------------|----------|--------|---------|-----------|
| Peak No.      | Ret Time | Height | Area    | Conc. (%) |
| 1             | 6.656    | 432298 | 4784035 | 70.209    |
| 2             | 7.021    | 178505 | 2029920 | 29.791    |

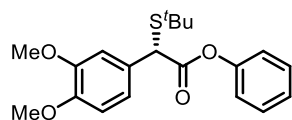

phenyl (*S*)-2-(*tert*-butylthio)-2-(3,4-dimethoxyphenyl)acetate (**3j**).

HPLC: Chiralpak IC column (250 mm); detected at 220 nm; hexane/*i*-propanol = 80/20;

flow = 1.0 mL/min; Retention time: 13.0 min (major), 19.9 min, 71% ee.

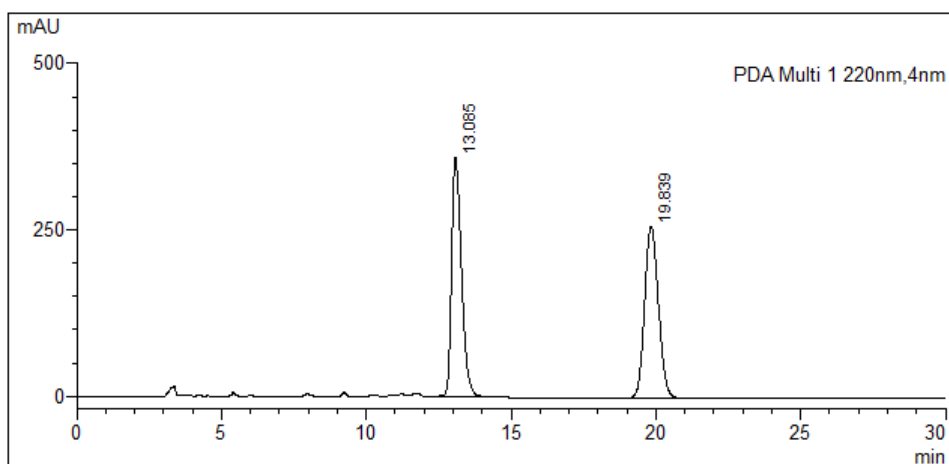

| PDA Ch1 220nm |          |        |         |          |
|---------------|----------|--------|---------|----------|
| Peak No.      | Ret Time | Height | Area    | Conc.(%) |
| 1             | 13.085   | 360093 | 8605829 | 50.272   |
| 2             | 19.839   | 258458 | 8512552 | 49.728   |

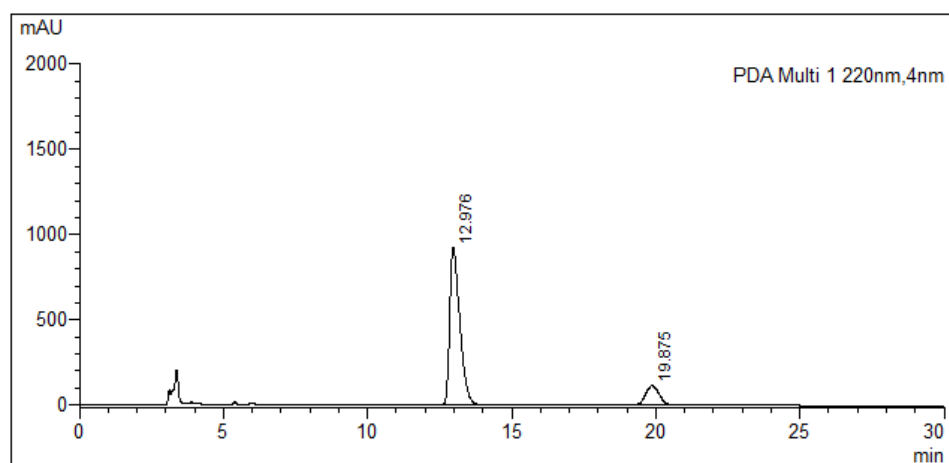

| PDA Ch1 220nm |          |        |          |          |
|---------------|----------|--------|----------|----------|
| Peak No.      | Ret Time | Height | Area     | Conc.(%) |
| 1             | 12.976   | 928663 | 22641858 | 85.601   |
| 2             | 19.875   | 116126 | 3808534  | 14.399   |

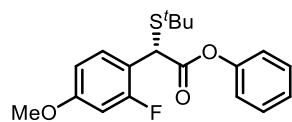

phenyl (*S*)-2-(tert-butylthio)-2-(2-fluoro-4-methoxyphenyl)acetate (**3k**)

HPLC: Chiralpak OZ-H column (250 mm); detected at 254 nm; hexane/*i*-propanol = 95/5; flow = 1.0 mL/min; Retention time: 4.5 min (major), 5.3 min, 60% ee.

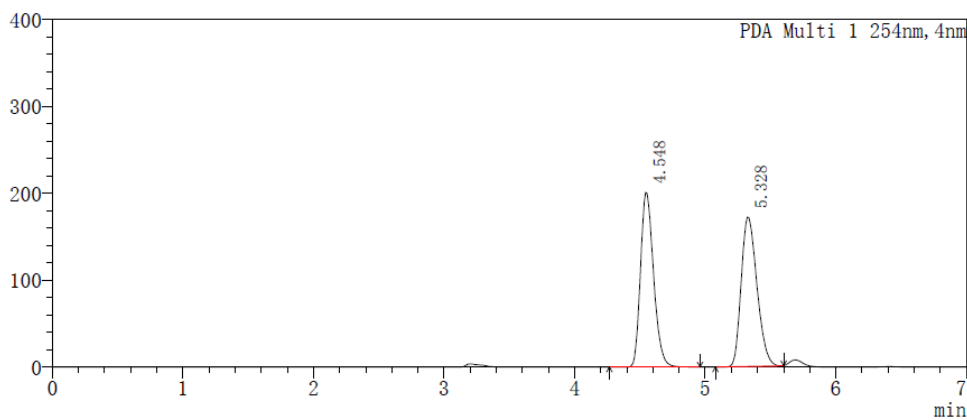

PDA Ch1 254nm

| Number | Retention | Area    | Height | Area%  |
|--------|-----------|---------|--------|--------|
| 1      | 4.548     | 1397028 | 201078 | 49.302 |
| 2      | 5.328     | 1436587 | 171696 | 50.698 |

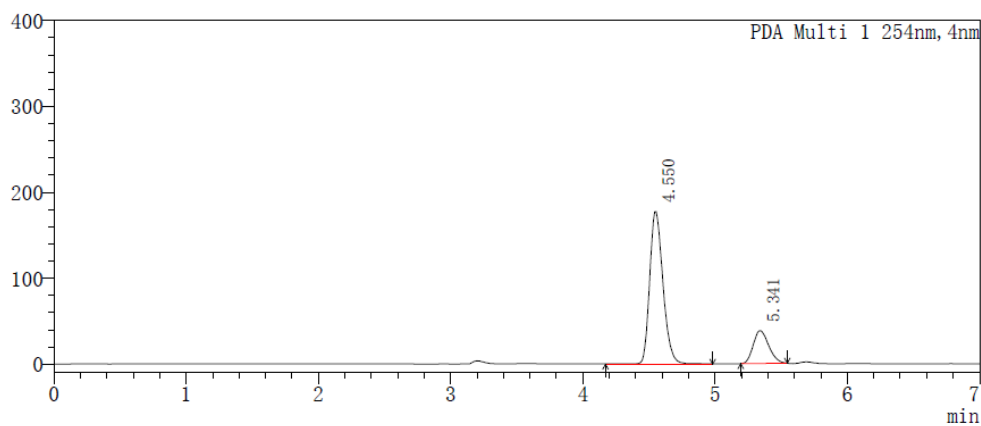

PDA Ch1 254nm

| Number | Retention | Area    | Height | Area%  |
|--------|-----------|---------|--------|--------|
| 1      | 4.550     | 1254726 | 177836 | 80.080 |
| 2      | 5.341     | 312119  | 38344  | 19.920 |

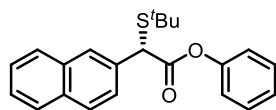

phenyl (*S*)-2-(*tert*-butylthio)-2-(naphthalen-2-yl)acetate (**3I**).

HPLC: Chiralpak OZ-H column (250 mm); detected at 220 nm; hexane/*i*-propanol = 99.5/0.5; flow = 0.7 mL/min; Retention time: 12.9 min (major), 13.8 min, 50% ee.

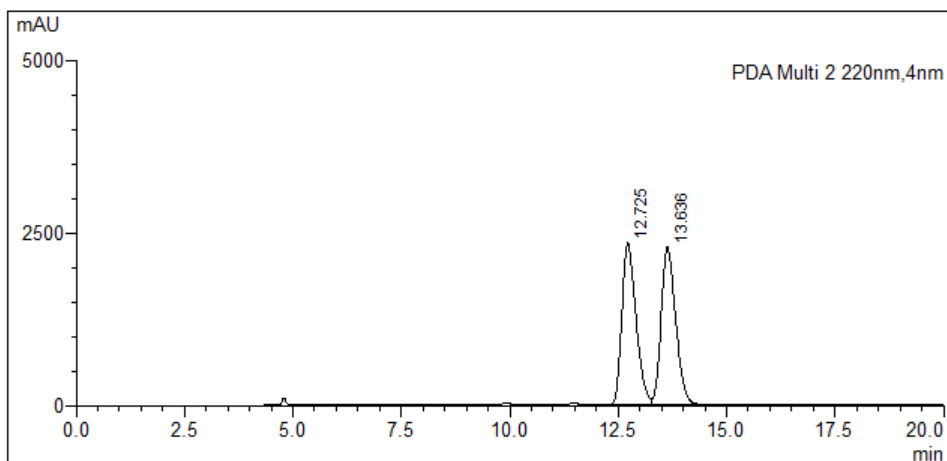

| PDA Ch2 220nm |          |         |          |          |
|---------------|----------|---------|----------|----------|
| Peak No.      | Ret Time | Height  | Area     | Conc.(%) |
| 1             | 12.725   | 2364011 | 53519722 | 49.741   |
| 2             | 13.636   | 2298965 | 54076043 | 50.259   |

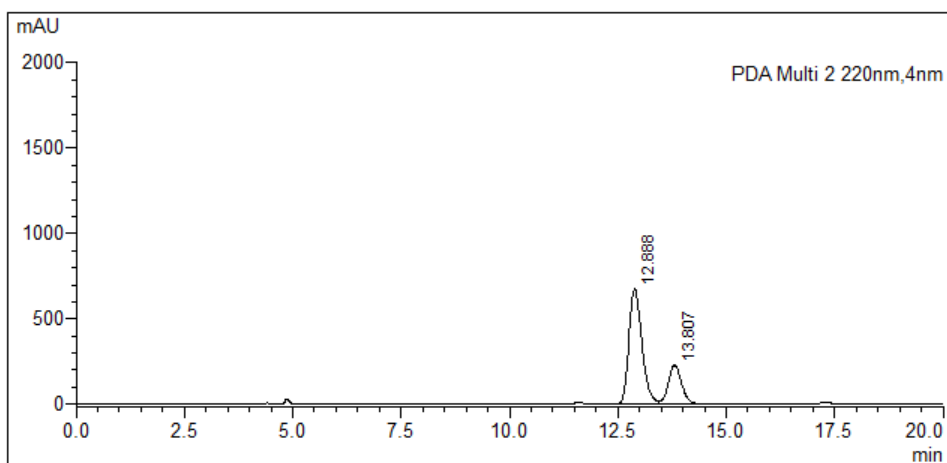

| PDA Ch2 220nm |          |        |          |          |
|---------------|----------|--------|----------|----------|
| Peak No.      | Ret Time | Height | Area     | Conc.(%) |
| 1             | 12.888   | 672500 | 13977272 | 74.843   |
| 2             | 13.807   | 225140 | 4698176  | 25.157   |



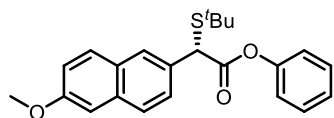

phenyl (*S*)-2-(tert-butylthio)-2-(6-methoxynaphthalen-2-yl)acetate (**3m**)

HPLC: Chiralpak IC-3 column (250 mm); detected at 254 nm; hexane/*i*-propanol = 99/1; flow = 1.0 mL/min; Retention time: 24.1 min, 29.4 min (major), 50% ee.

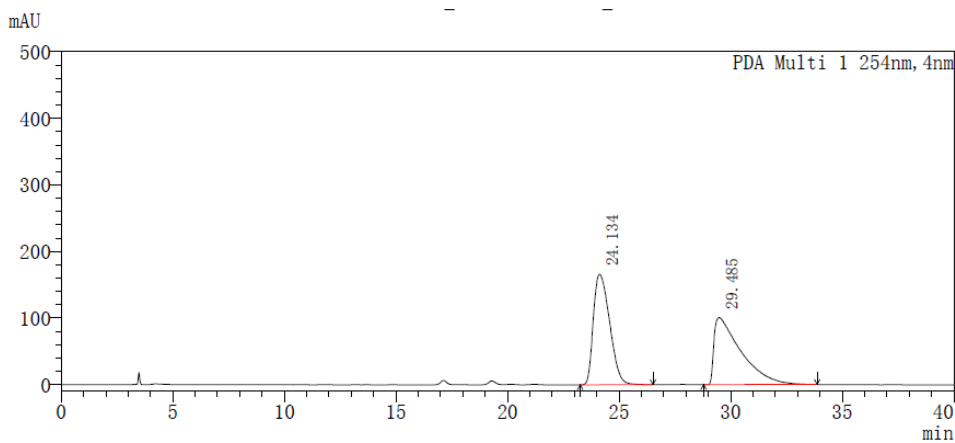

PDA Ch1 254nm

| Number | Retention | Area    | Height | Area%  |
|--------|-----------|---------|--------|--------|
| 1      | 24.134    | 8411555 | 165764 | 49.878 |
| 2      | 29.485    | 8452654 | 100744 | 50.122 |

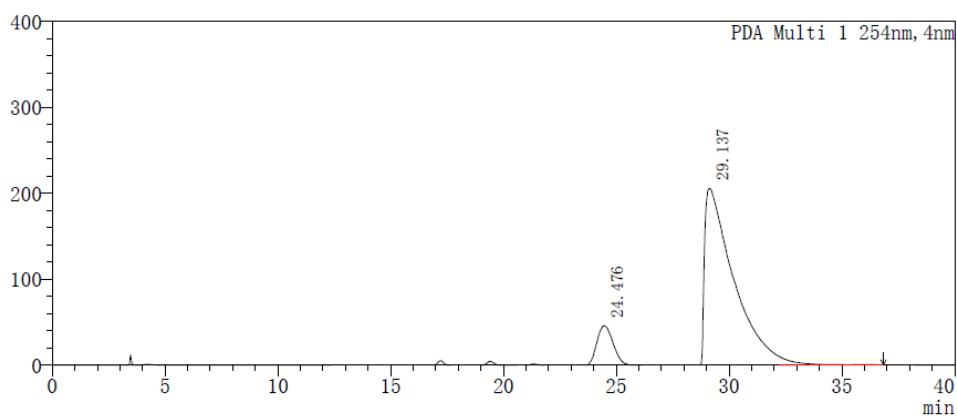

PDA Ch1 254nm

| Number | Retention | Area     | Height | Area%  |
|--------|-----------|----------|--------|--------|
| 1      | 24.476    | 2326036  | 46097  | 11.093 |
| 2      | 29.137    | 18642880 | 206045 | 88.907 |

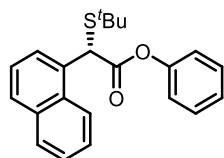

phenyl (*S*)-2-(tert-butylthio)-2-(naphthalen-1-yl)acetate (**3n**)

HPLC: Chiralpak OZ-H column (250 mm); detected at 254 nm; hexane/*i*-propanol = 95/5; flow = 1.0 mL/min; Retention time: 4.6 min (major), 5.1 min, 54% ee.

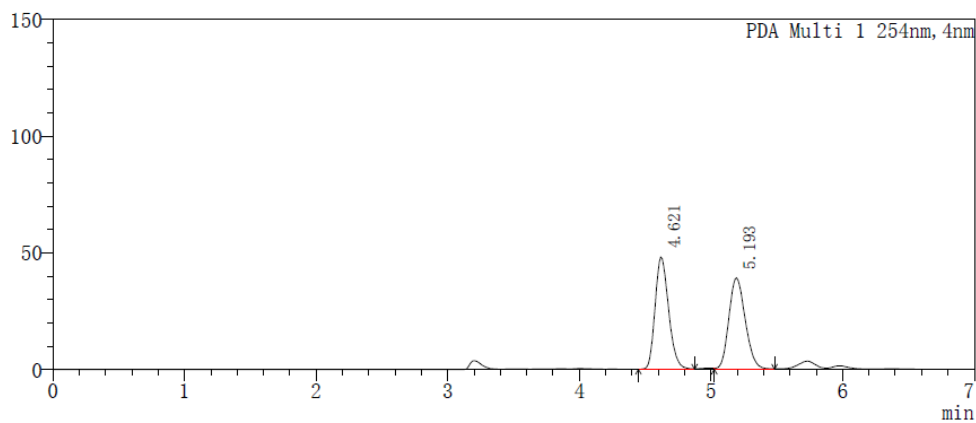

PDA Ch1 254nm

| Number | Retention | Area   | Height | Area%  |
|--------|-----------|--------|--------|--------|
| 1      | 4.621     | 342952 | 48042  | 50.285 |
| 2      | 5.193     | 339064 | 39125  | 49.715 |

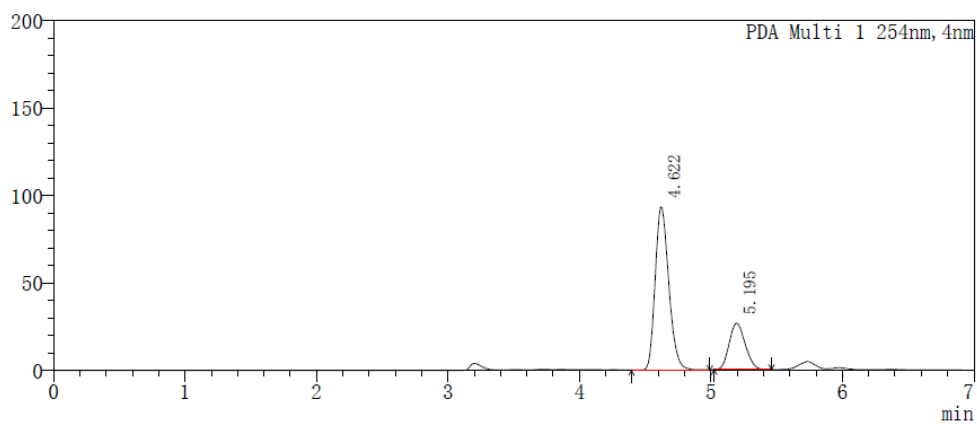

PDA Ch1 254nm

| Number | Retention | Area   | Height | Area%  |
|--------|-----------|--------|--------|--------|
| 1      | 4.622     | 687829 | 93761  | 75.352 |
| 2      | 5.195     | 224996 | 26612  | 24.648 |

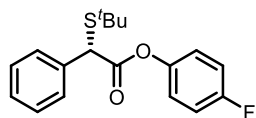

4-fluorophenyl (*S*)-2-(*tert*-butylthio)-2-phenylacetate (**30**).

HPLC: Chiralpak OZ-H column (250 mm); detected at 220 nm; hexane/*i*-propanol = 99/1; flow = 0.7 mL/min; Retention time: 6.6 min (major), 7.5 min, 54% ee.

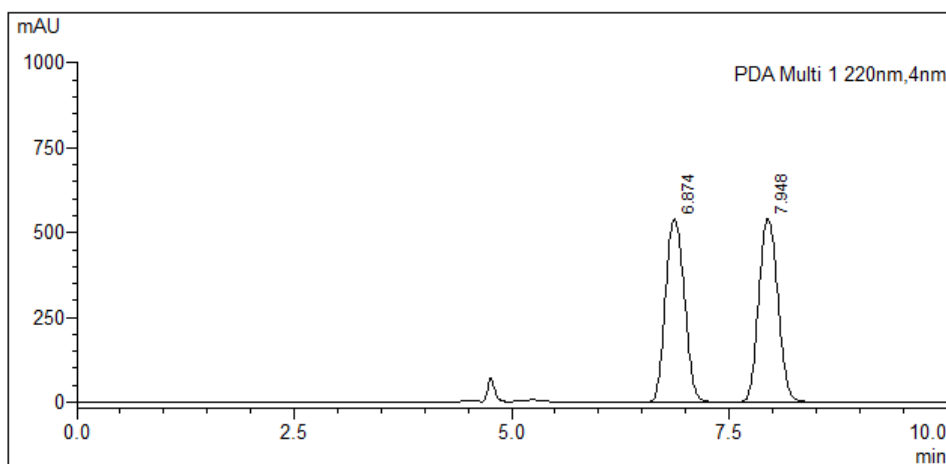

| PDA Ch1 220nm |          |        |         |          |
|---------------|----------|--------|---------|----------|
| Peak No.      | Ret Time | Height | Area    | Conc.(%) |
| 1             | 6.874    | 538625 | 8205871 | 49.846   |
| 2             | 7.948    | 541598 | 8256533 | 50.154   |

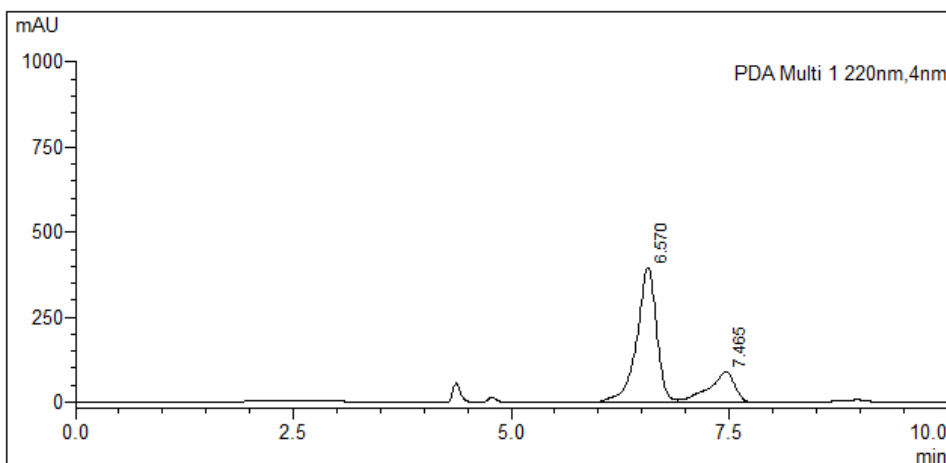

| PDA Ch1 220nm |          |        |         |          |
|---------------|----------|--------|---------|----------|
| Peak No.      | Ret Time | Height | Area    | Conc.(%) |
| 1             | 6.570    | 397526 | 6308279 | 77.066   |
| 2             | 7.465    | 90642  | 1877310 | 22.934   |

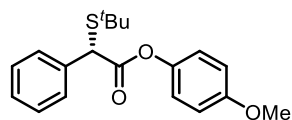

4-methoxyphenyl (*S*)-2-(*tert*-butylthio)-2-phenylacetate (**3p**).

HPLC: Chiralpak OZ-H column (250 mm); detected at 220 nm; hexane/*i*-propanol = 99/1; flow = 0.7 mL/min; Retention time: 12.8 min (major), 16.8 min, 51% ee.

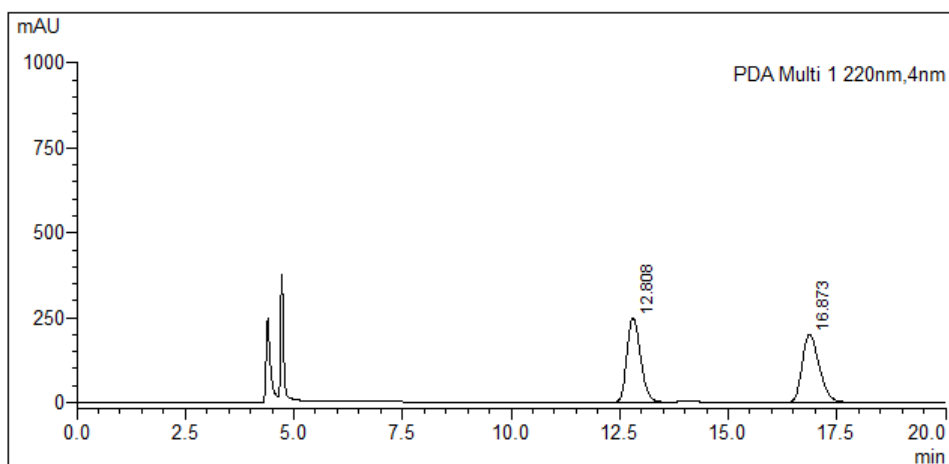

| PDA Ch1 220nm |          |        |         |          |
|---------------|----------|--------|---------|----------|
| Peak No.      | Ret Time | Height | Area    | Conc.(%) |
| 1             | 12.808   | 248102 | 5442884 | 50.160   |
| 2             | 16.873   | 200261 | 5408063 | 49.840   |

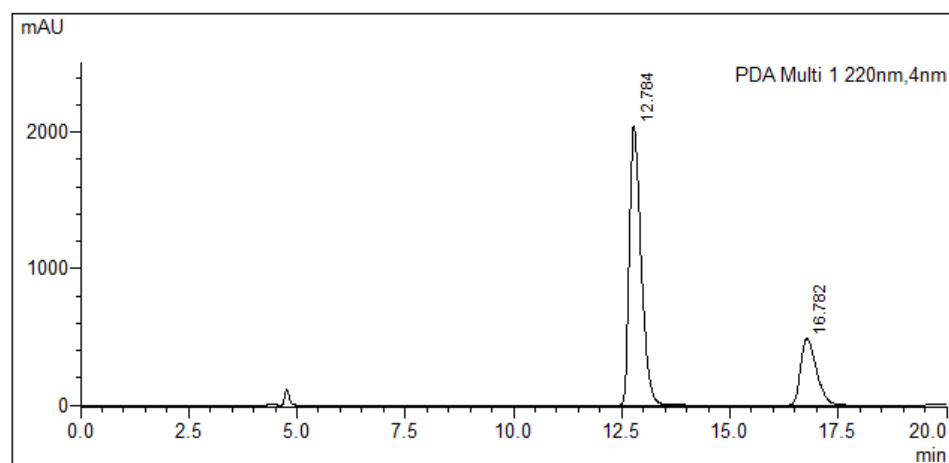

| PDA Ch1 220nm |          |         |          |          |
|---------------|----------|---------|----------|----------|
| Peak No.      | Ret Time | Height  | Area     | Conc.(%) |
| 1             | 12.784   | 2044296 | 38477012 | 75.694   |
| 2             | 16.782   | 485760  | 12355487 | 24.306   |

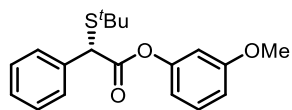

3-methoxyphenyl (*S*)-2-(*tert*-butylthio)-2-phenylacetate (**3q**).

HPLC: Chiralpak OZ-H column (250 mm); detected at 220 nm; hexane/*i*-propanol = 99/1; flow = 0.7 mL/min; Retention time: 12.8 min (major), 16.8 min, 68% ee.

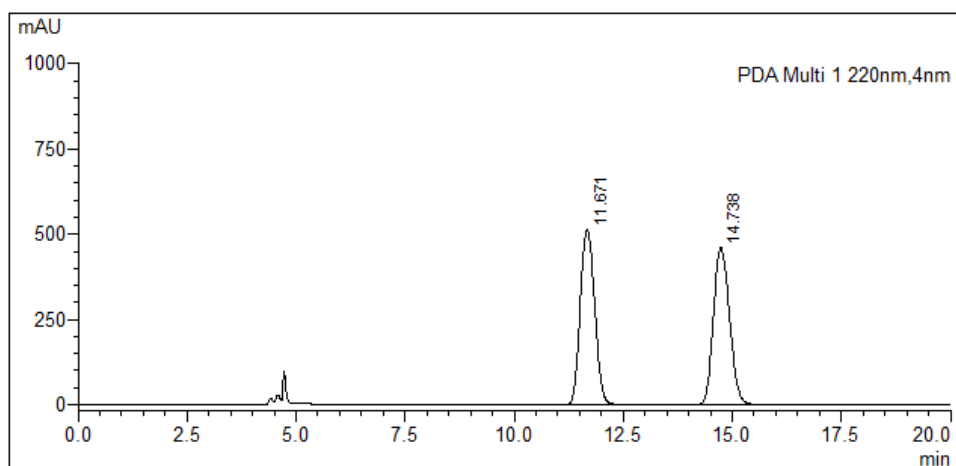

| PDA Ch1 220nm |          |        |          |           |
|---------------|----------|--------|----------|-----------|
| Peak No.      | Ret Time | Height | Area     | Conc. (%) |
| 1             | 11.671   | 512891 | 11841098 | 49.916    |
| 2             | 14.738   | 459981 | 11881107 | 50.084    |

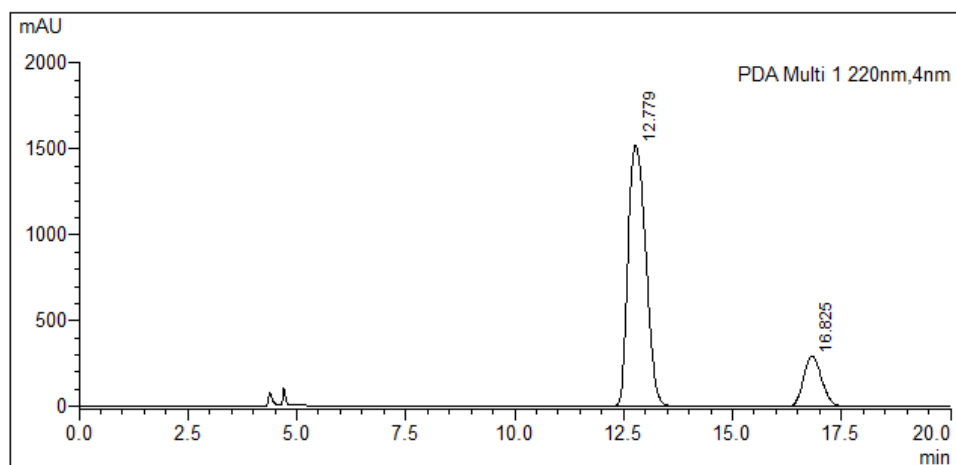

| PDA Ch1 220nm |          |         |          |           |
|---------------|----------|---------|----------|-----------|
| Peak No.      | Ret Time | Height  | Area     | Conc. (%) |
| 1             | 12.779   | 1522286 | 42953021 | 83.795    |
| 2             | 16.825   | 291864  | 8306897  | 16.205    |

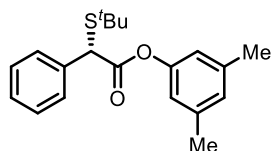

phenyl (*S*)-2-(4-bromophenyl)-2-(*tert*-butylthio)acetate (**3r**).

HPLC: Chiralpak OZ-H column (250 mm); detected at 220 nm; hexane/*i*-propanol = 99/1; flow = 0.7 mL/min; Retention time: 6.6 min, 7.9 min (major), 74% ee.

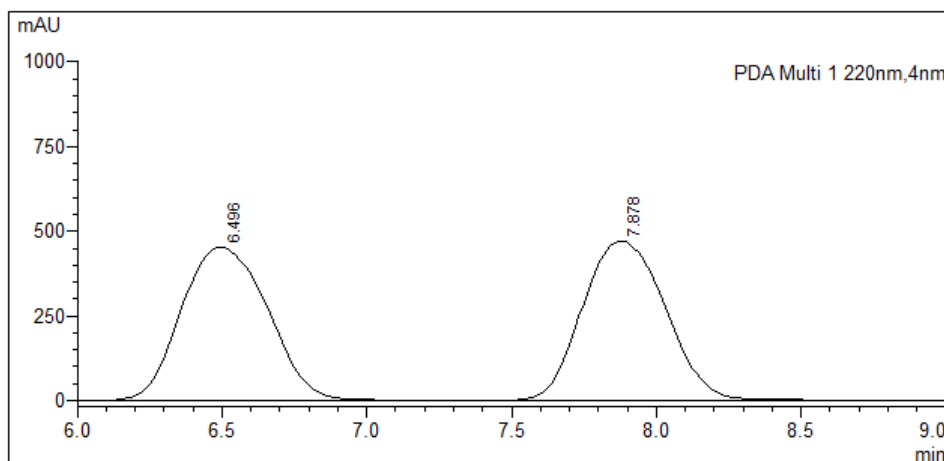

| PDA Ch1 220nm |          |        |         |          |
|---------------|----------|--------|---------|----------|
| Peak No.      | Ret Time | Height | Area    | Conc.(%) |
| 1             | 6.496    | 451604 | 9409210 | 49.923   |
| 2             | 7.878    | 470424 | 9438154 | 50.077   |

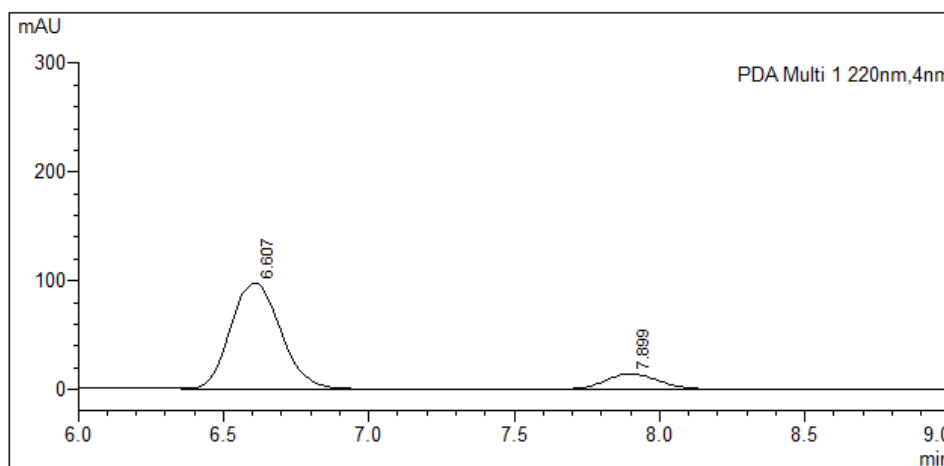

| PDA Ch1 220nm |          |        |         |          |
|---------------|----------|--------|---------|----------|
| Peak No.      | Ret Time | Height | Area    | Conc.(%) |
| 1             | 6.607    | 97949  | 1185538 | 86.928   |
| 2             | 7.899    | 14010  | 178285  | 13.072   |

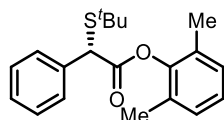

2,6-dimethylphenyl (*S*)-2-(*tert*-butylthio)-2-phenylacetate (**3s**).

HPLC: Chiralpak OZ-H column (250 mm); detected at 220 nm; hexane/*i*-propanol = 99/1; flow = 0.7 mL/min; Retention time: 7.6 min, 10.1 min (major), 30% ee.

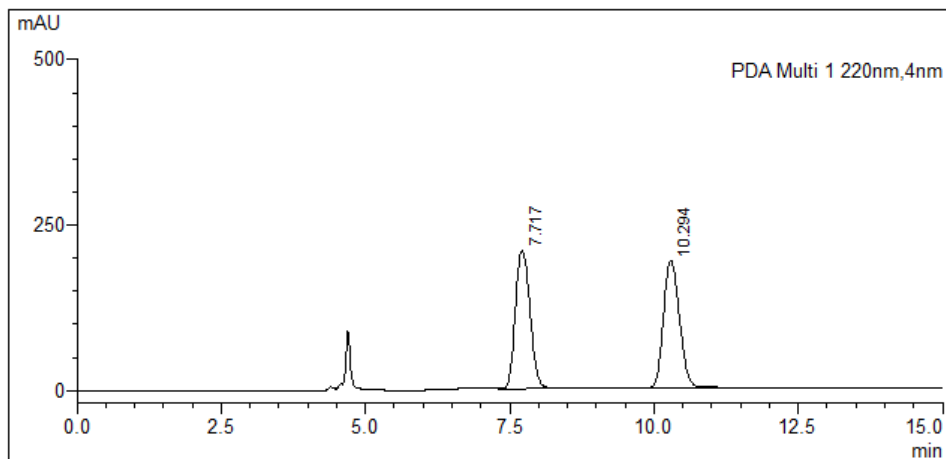

| PDA Ch1 220nm |          |        |         |          |
|---------------|----------|--------|---------|----------|
| Peak No.      | Ret Time | Height | Area    | Conc.(%) |
| 1             | 7.717    | 208799 | 3713548 | 49.737   |
| 2             | 10.294   | 192408 | 3752839 | 50.263   |

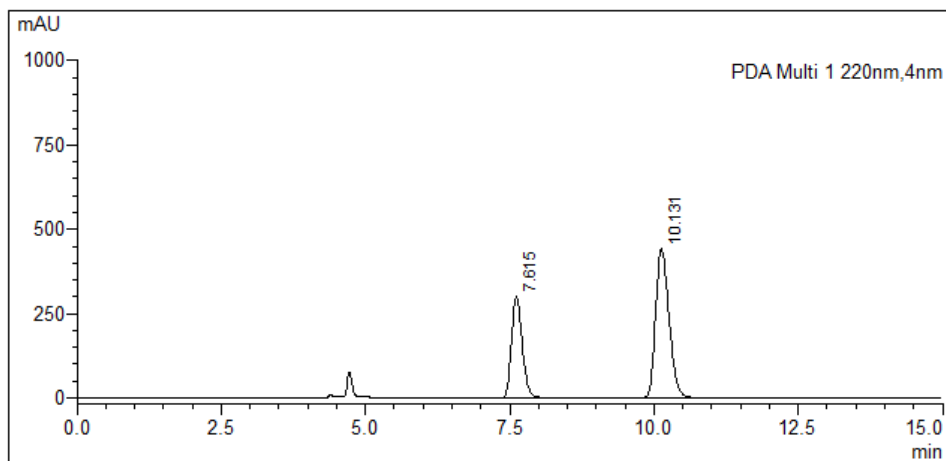

| PDA Ch1 220nm |          |        |         |          |
|---------------|----------|--------|---------|----------|
| Peak No.      | Ret Time | Height | Area    | Conc.(%) |
| 1             | 7.615    | 300027 | 3924112 | 35.315   |
| 2             | 10.131   | 442232 | 7187755 | 64.685   |

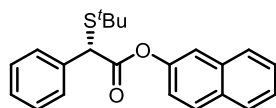

naphthalen-2-yl (*S*)-2-(*tert*-butylthio)-2-phenylacetate (**3t**).

HPLC: Chiralpak OZ-H column (250 mm); detected at 220 nm; hexane/*i*-propanol = 99/1; flow = 0.7 mL/min; Retention time: 9.0 min (major), 11.3 min, 59% ee.

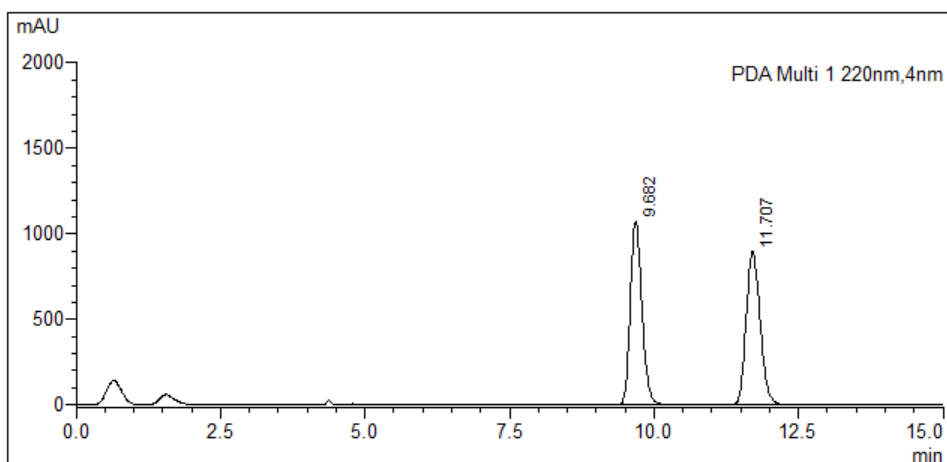

| PDA Ch1 220nm |          |         |          |          |
|---------------|----------|---------|----------|----------|
| Peak No.      | Ret Time | Height  | Area     | Conc.(%) |
| 1             | 9.682    | 1073278 | 15134277 | 49.800   |
| 2             | 11.707   | 898825  | 15255727 | 50.200   |

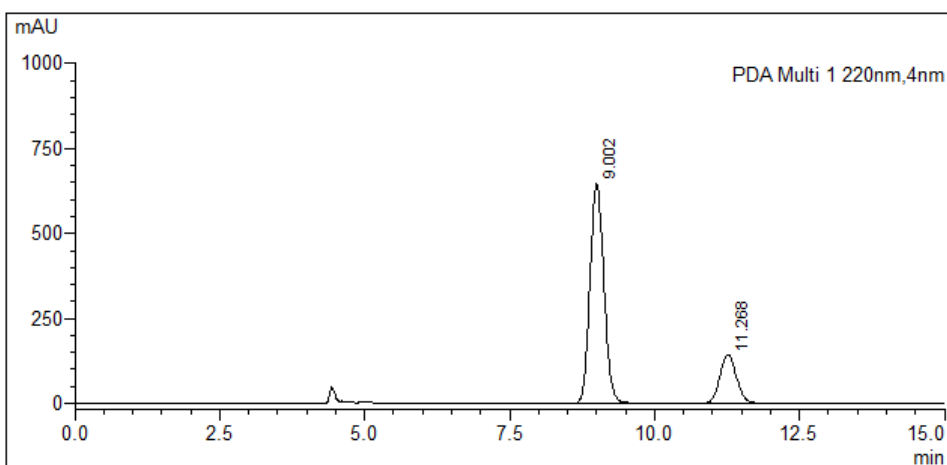

| PDA Ch1 220nm |          |        |          |          |
|---------------|----------|--------|----------|----------|
| Peak No.      | Ret Time | Height | Area     | Conc.(%) |
| 1             | 9.002    | 645494 | 10798097 | 79.184   |
| 2             | 11.268   | 143613 | 2838631  | 20.816   |



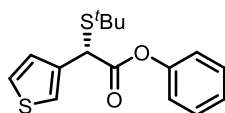

phenyl (*S*)-2-(tert-butylthio)-2-(thiophen-3-yl)acetate (**3u**)

HPLC: Chiralpak OJ-H column (250 mm); detected at 254 nm; hexane/*i*-propanol = 90/10; flow = 1.0 mL/min; Retention time: 15.7 min (major), 17.4 min, 40% ee.

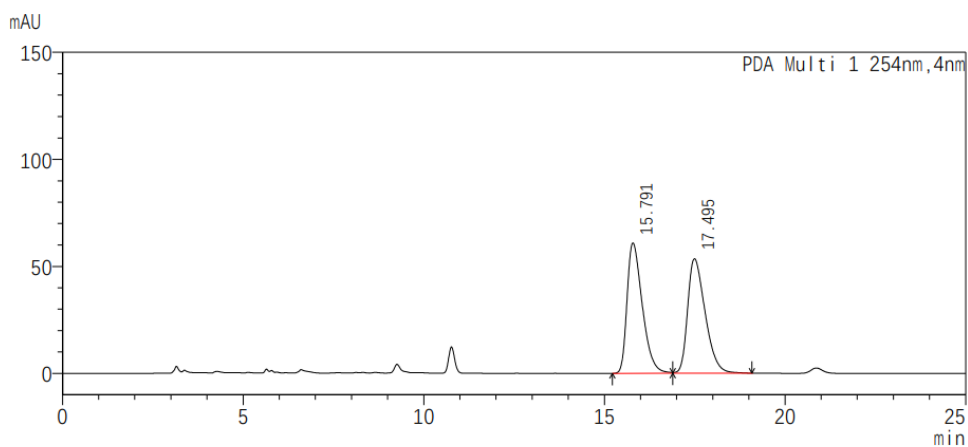

PDA Ch1 254nm

| Number | Retention | Area    | Height | Area%  |
|--------|-----------|---------|--------|--------|
| 1      | 15.791    | 1790853 | 60937  | 49.789 |
| 2      | 17.495    | 1806003 | 53537  | 50.211 |

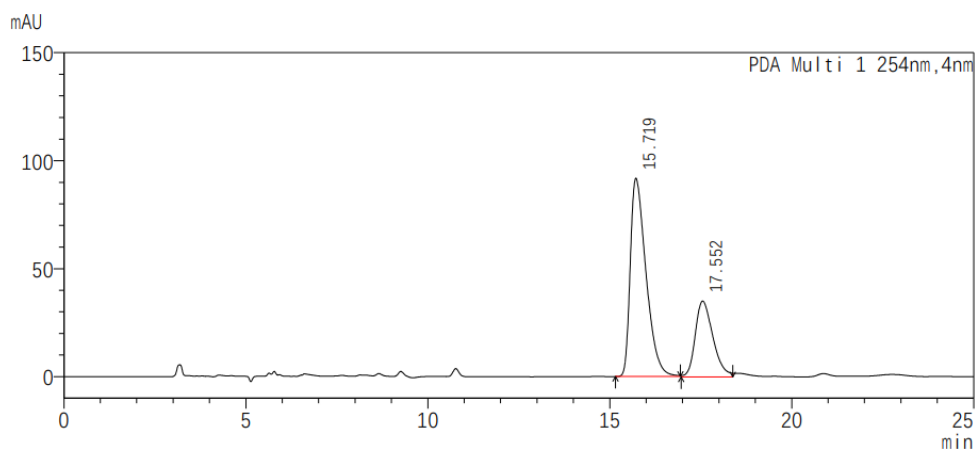

PDA Ch1 254nm

| Number | Retention | Area    | Height | Area%  |
|--------|-----------|---------|--------|--------|
| 1      | 15.719    | 2763096 | 91857  | 69.885 |
| 2      | 17.552    | 1190656 | 35175  | 30.115 |

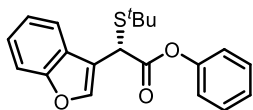

phenyl (*S*)-2-(benzofuran-3-yl)-2-(tert-butylthio)acetate (**3v**)

HPLC: Chiralpak OZ-H column (250 mm); detected at 254 nm; hexane/*i*-propanol = 99/1; flow = 0.7 mL/min; Retention time: 7.5 min (major), 8.2 min, 58% ee.

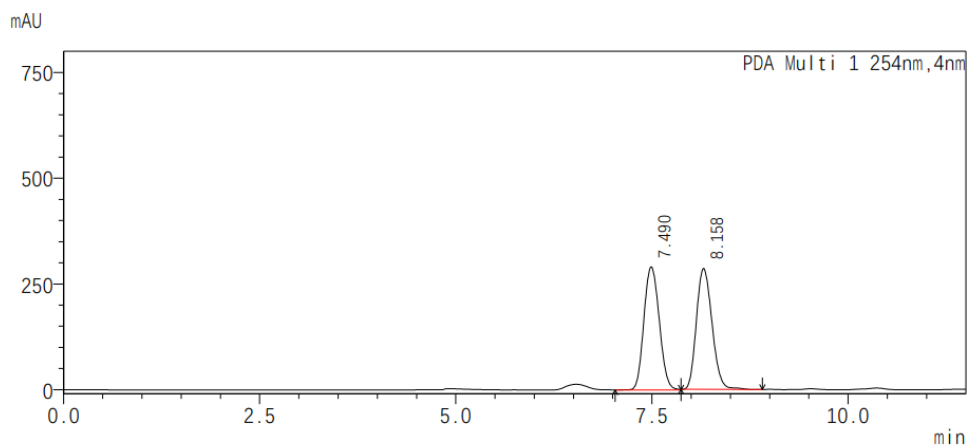

PDA\_Ch1\_254nm

| Number | Retention | Area    | Height | Area%  |
|--------|-----------|---------|--------|--------|
| 1      | 7.490     | 3977338 | 291336 | 50.041 |
| 2      | 8.158     | 3970863 | 285908 | 49.959 |

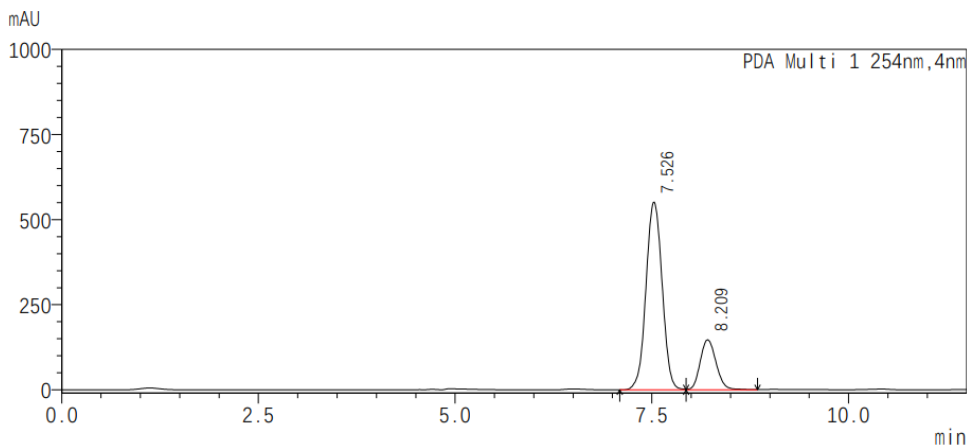

PDA\_Ch1\_254nm

| Number | Retention | Area    | Height | Area%  |
|--------|-----------|---------|--------|--------|
| 1      | 7.526     | 7881602 | 551420 | 79.148 |
| 2      | 8.209     | 2076456 | 146852 | 20.852 |

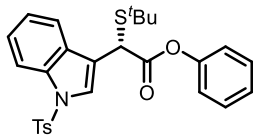

phenyl (S)-2-(tert-butylthio)-2-(1-tosyl-1H-indol-3-yl)acetate (**3w**)

HPLC: Chiralpak AD-H column (250 mm); detected at 254 nm; hexane/*i*-propanol = 95/5; flow = 1.0 mL/min; Retention time: 23.1 min, 27.2 min (major), 69% ee.

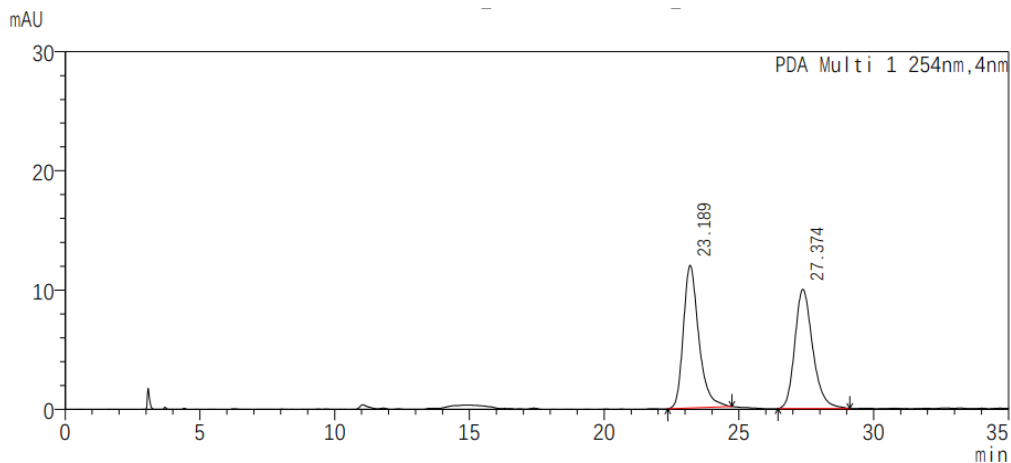

PDA Ch1 254nm

| Number | Retention | Area   | Height | Area%  |
|--------|-----------|--------|--------|--------|
| 1      | 23.189    | 477401 | 11958  | 50.794 |
| 2      | 27.374    | 462473 | 9991   | 49.206 |

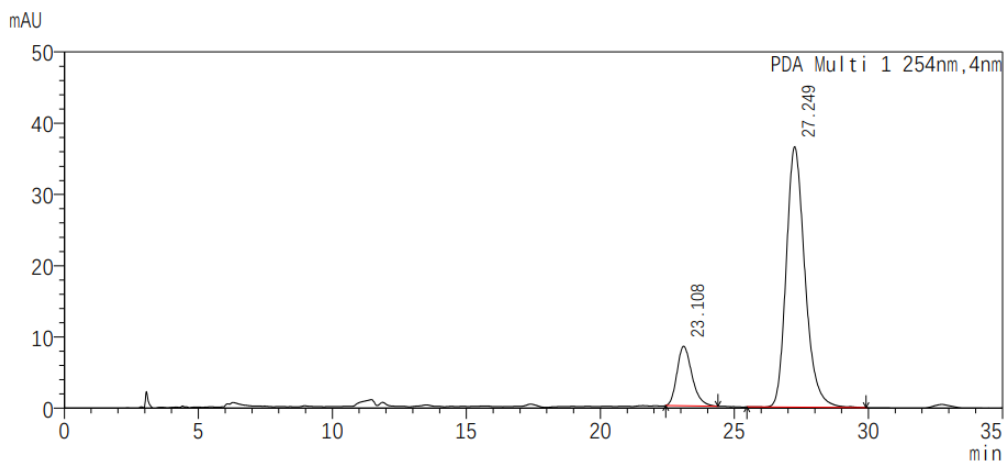

PDA Ch1 254nm

| Number | Retention | Area    | Height | Area%  |
|--------|-----------|---------|--------|--------|
| 1      | 23.108    | 323477  | 8346   | 15.448 |
| 2      | 27.249    | 1770519 | 36535  | 84.552 |

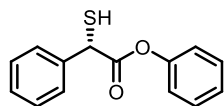

phenyl (*S*)-2-mercapto-2-phenylacetate (**4a**).

HPLC: Chiralpak OZ-H column (250 mm); detected at 220 nm; hexane/*i*-propanol = 80/20; flow = 0.7 mL/min; Retention time: 40.0 min, 49.2 min (major), 95% ee.

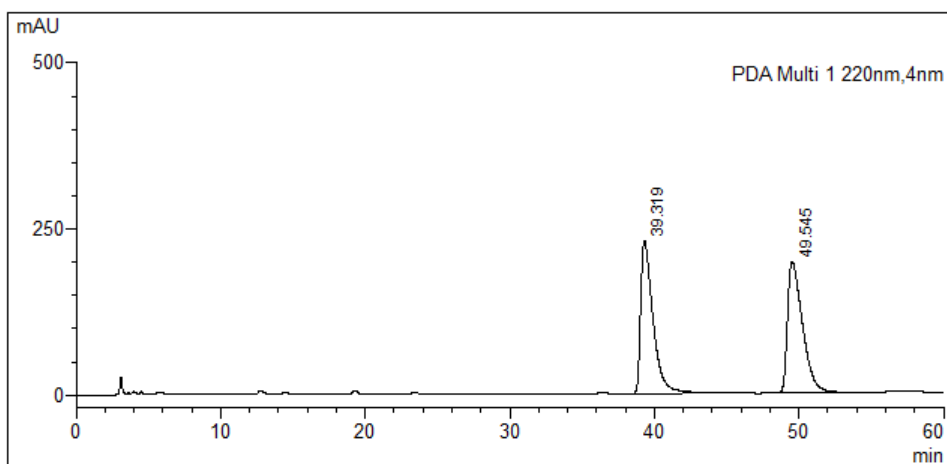

| PDA Ch1 220nm |          |        |          |          |
|---------------|----------|--------|----------|----------|
| Peak No.      | Ret Time | Height | Area     | Conc.(%) |
| 1             | 39.319   | 230310 | 13963063 | 49.334   |
| 2             | 49.545   | 197840 | 14340250 | 50.666   |

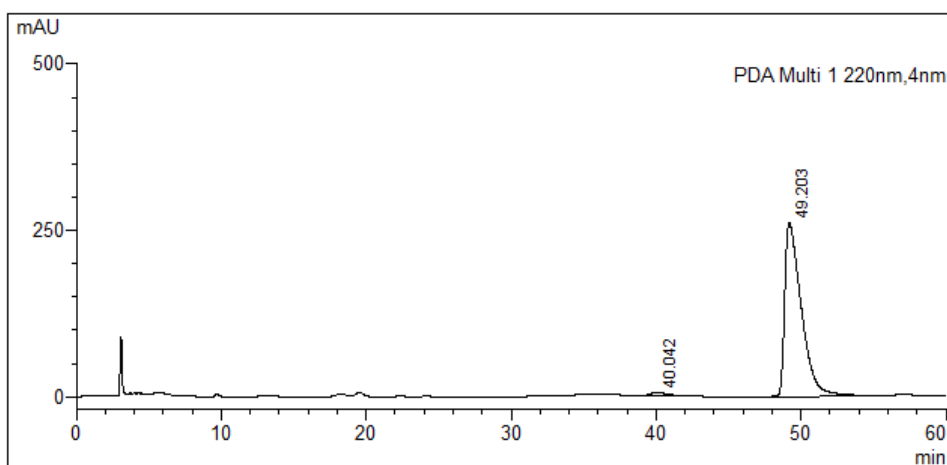

| PDA Ch1 220nm |          |        |          |          |
|---------------|----------|--------|----------|----------|
| Peak No.      | Ret Time | Height | Area     | Conc.(%) |
| 1             | 40.042   | 5847   | 553159   | 2.604    |
| 2             | 49.203   | 259823 | 20693317 | 97.396   |
